# Supplementary material for: An efficient and robust laboratory workflow and tetrapod database for larger scale environmental DNA studies
Source: PubMed Central journal article supplement (PMC6461710; doi:10.1093/gigascience/giz029), 2019-04-13

# GigaScience

## An efficient and improved laboratory workflow and tetrapod database for larger scale eDNA studies --Manuscript Draft--

|                                                      |                                                                                                                                                                                                                                                                                                                                                                                                                                                                                                                                                                                                                                                                                                                                                                                                                                                                                                                                                                                                                                                                                                                                                                                                                                                                                                                                                                                                                                                                                                                                                                                                                                                                                                                                                                                                                                                                                                                                                                                                                                                                                                                                                                                                                                           |
|------------------------------------------------------|-------------------------------------------------------------------------------------------------------------------------------------------------------------------------------------------------------------------------------------------------------------------------------------------------------------------------------------------------------------------------------------------------------------------------------------------------------------------------------------------------------------------------------------------------------------------------------------------------------------------------------------------------------------------------------------------------------------------------------------------------------------------------------------------------------------------------------------------------------------------------------------------------------------------------------------------------------------------------------------------------------------------------------------------------------------------------------------------------------------------------------------------------------------------------------------------------------------------------------------------------------------------------------------------------------------------------------------------------------------------------------------------------------------------------------------------------------------------------------------------------------------------------------------------------------------------------------------------------------------------------------------------------------------------------------------------------------------------------------------------------------------------------------------------------------------------------------------------------------------------------------------------------------------------------------------------------------------------------------------------------------------------------------------------------------------------------------------------------------------------------------------------------------------------------------------------------------------------------------------------|
| <b>Manuscript Number:</b>                            | GIGA-D-18-00219                                                                                                                                                                                                                                                                                                                                                                                                                                                                                                                                                                                                                                                                                                                                                                                                                                                                                                                                                                                                                                                                                                                                                                                                                                                                                                                                                                                                                                                                                                                                                                                                                                                                                                                                                                                                                                                                                                                                                                                                                                                                                                                                                                                                                           |
| <b>Full Title:</b>                                   | An efficient and improved laboratory workflow and tetrapod database for larger scale eDNA studies                                                                                                                                                                                                                                                                                                                                                                                                                                                                                                                                                                                                                                                                                                                                                                                                                                                                                                                                                                                                                                                                                                                                                                                                                                                                                                                                                                                                                                                                                                                                                                                                                                                                                                                                                                                                                                                                                                                                                                                                                                                                                                                                         |
| <b>Article Type:</b>                                 | Data Note                                                                                                                                                                                                                                                                                                                                                                                                                                                                                                                                                                                                                                                                                                                                                                                                                                                                                                                                                                                                                                                                                                                                                                                                                                                                                                                                                                                                                                                                                                                                                                                                                                                                                                                                                                                                                                                                                                                                                                                                                                                                                                                                                                                                                                 |
| <b>Funding Information:</b>                          | German Federal Ministry of Education and Research (BMBF) (01LN1301A) Dr. Andreas Wilting                                                                                                                                                                                                                                                                                                                                                                                                                                                                                                                                                                                                                                                                                                                                                                                                                                                                                                                                                                                                                                                                                                                                                                                                                                                                                                                                                                                                                                                                                                                                                                                                                                                                                                                                                                                                                                                                                                                                                                                                                                                                                                                                                  |
| <b>Abstract:</b>                                     | <p><b>Background</b><br/>The use of environmental DNA, 'eDNA,' for species detection via metabarcoding is growing rapidly and now, even terrestrial mammals can be monitored via 'invertebrate-derived DNA' or 'iDNA' from hematophagous invertebrates. We present a co-designed lab workflow and bioinformatic pipeline to mitigate the two most important risks of e/iDNA: sample contamination and taxonomic mis-assignment. These risks arise from the need for amplification to detect the trace amounts of DNA and the necessity of using short target regions due to DNA degradation.</p> <p><b>Findings</b><br/>Here we present a high-throughput laboratory workflow that minimises these risks via a three-step strategy: (1) each sample is sequenced for two PCR replicates from each of two extraction replicates; (2) we use a 'twin-tagging,' two-step PCR protocol; (3) and a multi-marker approach targeting three mitochondrial loci: 12S, 16S and CytB. As a test, 1532 leeches were analysed from Sabah, Malaysian Borneo. Twin-tagging allowed us to detect and exclude chimeric sequences. The smallest DNA fragment (16S) amplified best for all samples but often at lower taxonomic resolution. We only accepted assignments that were found in both extraction replicates, totalling 174 assignments for 96 samples.</p> <p>To avoid false taxonomic assignments, we also present an approach to create curated reference databases that can be used with the powerful taxonomic-assignment method PROTAX. For some taxonomic groups and some markers, curation resulted in over 50% of sequences being deleted from public reference databases, due mainly to: (1) limited overlap between our target amplicon and available reference sequences; (2) apparent mislabelling of reference sequences; (3) redundancy. A provided bioinformatics pipeline processes amplicons and conducts the PROTAX taxonomic assignment.</p> <p><b>Conclusions</b><br/>Our metabarcoding workflow should help research groups to increase the robustness of their results and therefore facilitate wider usage of e/iDNA, which is turning into a valuable source of ecological and conservation information on tetrapods.</p> |
| <b>Corresponding Author:</b>                         | Jan Axtner<br>Leibniz Institute for Zoo and Wildlife Research<br>Berlin, Germany GERMANY                                                                                                                                                                                                                                                                                                                                                                                                                                                                                                                                                                                                                                                                                                                                                                                                                                                                                                                                                                                                                                                                                                                                                                                                                                                                                                                                                                                                                                                                                                                                                                                                                                                                                                                                                                                                                                                                                                                                                                                                                                                                                                                                                  |
| <b>Corresponding Author Secondary Information:</b>   |                                                                                                                                                                                                                                                                                                                                                                                                                                                                                                                                                                                                                                                                                                                                                                                                                                                                                                                                                                                                                                                                                                                                                                                                                                                                                                                                                                                                                                                                                                                                                                                                                                                                                                                                                                                                                                                                                                                                                                                                                                                                                                                                                                                                                                           |
| <b>Corresponding Author's Institution:</b>           | Leibniz Institute for Zoo and Wildlife Research                                                                                                                                                                                                                                                                                                                                                                                                                                                                                                                                                                                                                                                                                                                                                                                                                                                                                                                                                                                                                                                                                                                                                                                                                                                                                                                                                                                                                                                                                                                                                                                                                                                                                                                                                                                                                                                                                                                                                                                                                                                                                                                                                                                           |
| <b>Corresponding Author's Secondary Institution:</b> |                                                                                                                                                                                                                                                                                                                                                                                                                                                                                                                                                                                                                                                                                                                                                                                                                                                                                                                                                                                                                                                                                                                                                                                                                                                                                                                                                                                                                                                                                                                                                                                                                                                                                                                                                                                                                                                                                                                                                                                                                                                                                                                                                                                                                                           |
| <b>First Author:</b>                                 | Jan Axtner                                                                                                                                                                                                                                                                                                                                                                                                                                                                                                                                                                                                                                                                                                                                                                                                                                                                                                                                                                                                                                                                                                                                                                                                                                                                                                                                                                                                                                                                                                                                                                                                                                                                                                                                                                                                                                                                                                                                                                                                                                                                                                                                                                                                                                |
| <b>First Author Secondary Information:</b>           |                                                                                                                                                                                                                                                                                                                                                                                                                                                                                                                                                                                                                                                                                                                                                                                                                                                                                                                                                                                                                                                                                                                                                                                                                                                                                                                                                                                                                                                                                                                                                                                                                                                                                                                                                                                                                                                                                                                                                                                                                                                                                                                                                                                                                                           |
| <b>Order of Authors:</b>                             | Jan Axtner<br>Alex Crampton-Platt<br>Lisa Hörig                                                                                                                                                                                                                                                                                                                                                                                                                                                                                                                                                                                                                                                                                                                                                                                                                                                                                                                                                                                                                                                                                                                                                                                                                                                                                                                                                                                                                                                                                                                                                                                                                                                                                                                                                                                                                                                                                                                                                                                                                                                                                                                                                                                           |

|                                                                                                                                                                                                                                                                                                                                                                                                                                                                                                                                     |                 |
|-------------------------------------------------------------------------------------------------------------------------------------------------------------------------------------------------------------------------------------------------------------------------------------------------------------------------------------------------------------------------------------------------------------------------------------------------------------------------------------------------------------------------------------|-----------------|
|                                                                                                                                                                                                                                                                                                                                                                                                                                                                                                                                     | Azlan Mohamed   |
|                                                                                                                                                                                                                                                                                                                                                                                                                                                                                                                                     | Charles C.Y. Xu |
|                                                                                                                                                                                                                                                                                                                                                                                                                                                                                                                                     | Douglas W. Yu   |
|                                                                                                                                                                                                                                                                                                                                                                                                                                                                                                                                     | Andreas Wilting |
| <b>Order of Authors Secondary Information:</b>                                                                                                                                                                                                                                                                                                                                                                                                                                                                                      |                 |
| <b>Additional Information:</b>                                                                                                                                                                                                                                                                                                                                                                                                                                                                                                      |                 |
| <b>Question</b>                                                                                                                                                                                                                                                                                                                                                                                                                                                                                                                     | <b>Response</b> |
| Are you submitting this manuscript to a special series or article collection?                                                                                                                                                                                                                                                                                                                                                                                                                                                       | No              |
| <p><b>Experimental design and statistics</b></p> <p>Full details of the experimental design and statistical methods used should be given in the Methods section, as detailed in our <a href="#">Minimum Standards Reporting Checklist</a>. Information essential to interpreting the data presented should be made available in the figure legends.</p> <p>Have you included all the information requested in your manuscript?</p>                                                                                                  | Yes             |
| <p><b>Resources</b></p> <p>A description of all resources used, including antibodies, cell lines, animals and software tools, with enough information to allow them to be uniquely identified, should be included in the Methods section. Authors are strongly encouraged to cite <a href="#">Research Resource Identifiers</a> (RRIDs) for antibodies, model organisms and tools, where possible.</p> <p>Have you included the information requested as detailed in our <a href="#">Minimum Standards Reporting Checklist</a>?</p> | Yes             |
| <p><b>Availability of data and materials</b></p> <p>All datasets and code on which the conclusions of the paper rely must be either included in your submission or deposited in <a href="#">publicly available repositories</a> (where available and ethically appropriate), referencing such data using a unique identifier in the references and in the “Availability of Data and Materials” section of your manuscript.</p>                                                                                                      | Yes             |

Have you have met the above requirement as detailed in our [Minimum Standards Reporting Checklist?](#)

1 An efficient and improved laboratory workflow and tetrapod database  
2 for larger scale eDNA studies

3  
4  
5  
6  
7 Jan Axtner<sup>1+</sup>, Alex Crampton-Platt<sup>1</sup>, Lisa A. Hörig<sup>1</sup>, Azlan Mohamed<sup>1</sup>, Charles C.Y. Xu<sup>2,3,4</sup>,  
8 Douglas W. Yu<sup>2,5</sup> and Andreas Wilting<sup>1</sup>  
9

10  
11  
12 **Affiliations:**

13 <sup>1</sup> Leibniz Institute for Zoo and Wildlife Research (*Leibniz-IZW*), Alfred-Kowalke-Str. 17,  
14 10315 Berlin, Germany

15  
16 <sup>2</sup> State Key Laboratory of Genetic Resources and Evolution, Kunming Institute of Zoology,  
17 Chinese Academy of Sciences, 32 Jiaochang East Road, Kunming, Yunnan 650223, China

18  
19 <sup>3</sup> Groningen Institute for Evolutionary Life Sciences, University of Groningen, P.O. Box  
20 11103, 9700 CC Groningen, The Netherlands

21 <sup>4</sup> Redpath Museum and Department of Biology, McGill University, Montreal, QC, Canada

22 <sup>5</sup> School of Biological Sciences, University of East Anglia, Norwich Research Park, Norwich,  
23 Norfolk NR47TJ, UK  
24

25 + corresponding author  
26

27  
28 **email addresses:**

29 Jan Axtner: axtner@izw-berlin.de

30 Alex Crampton-Platt: alex@naturemetrics.co.uk

31 Lisa A. Hörig: lisa.hoerig@arcor.de

32 Azlan Mohamed: mohamed@izw-berlin.de

33 Charles C.Y. Xu: charles.cong.xu@gmail.com

34 Douglas W. Yu: dougwyu@mac.com

35 Andreas Wilting: wilting@izw-berlin.de  
36  
37  
38  
39

40 **Keywords:**

41 metabarcoding, iDNA, eDNA, leeches  
42  
43  
44  
45  
46  
47  
48  
49  
50  
51  
52  
53  
54  
55  
56  
57  
58  
59  
60  
61  
62  
63  
64  
65

31

1  
2  
3  
4  
5  
6  
7  
8  
9  
10  
11  
12  
13  
14  
15  
16  
17  
18  
19  
20  
21  
22  
23  
24  
25  
26  
27  
28  
29  
30  
31  
32  
33  
34  
35  
36  
37  
38  
39  
40  
41  
42  
43  
44  
45  
46  
47  
48  
49  
50  
51  
52  
53  
54  
55  
56  
57  
58  
59  
60  
61  
62  
63  
64  
65

## Abstract

### Background

The use of environmental DNA, ‘eDNA,’ for species detection via metabarcoding is growing rapidly and now, even terrestrial mammals can be monitored via ‘invertebrate-derived DNA’ or ‘iDNA’ from hematophagous invertebrates. We present a co-designed lab workflow and bioinformatic pipeline to mitigate the two most important risks of e/iDNA: sample contamination and taxonomic mis-assignment. These risks arise from the need for amplification to detect the trace amounts of DNA and the necessity of using short target regions due to DNA degradation.

### Findings

Here we present a high-throughput laboratory workflow that minimises these risks via a three-step strategy: (1) each sample is sequenced for two *PCR replicates* from each of two *extraction replicates*; (2) we use a ‘twin-tagging,’ two-step PCR protocol; (3) and a multi-marker approach targeting three mitochondrial loci: *12S*, *16S* and *CytB*. As a test, 1532 leeches were analysed from Sabah, Malaysian Borneo. Twin-tagging allowed us to detect and exclude chimeric sequences. The smallest DNA fragment (*16S*) amplified best for all samples but often at lower taxonomic resolution. We only accepted assignments that were found in both *extraction replicates*, totalling 174 assignments for 96 samples.

To avoid false taxonomic assignments, we also present an approach to create curated reference databases that can be used with the powerful taxonomic-assignment method *PROTAX*. For some taxonomic groups and some markers, curation resulted in over 50% of sequences being deleted from public reference databases, due mainly to: (1) limited overlap between our target amplicon and available reference sequences; (2) apparent mislabelling of reference sequences; (3) redundancy. A provided bioinformatics pipeline processes amplicons and conducts the *PROTAX* taxonomic assignment.

### Conclusions

Our metabarcoding workflow should help research groups to increase the robustness of their results and therefore facilitate wider usage of e/iDNA, which is turning into a valuable source of ecological and conservation information on tetrapods.

## Introduction

Monitoring, or even detecting, elusive or cryptic species in the wild can be challenging, particularly in dense vegetation or difficult terrain. In recent years there has been a rise in the availability of cost-effective DNA-based methods made possible by advances in high-throughput DNA sequencing (HTS). One such method is eDNA metabarcoding, which seeks to identify the species present in a habitat from traces of ‘environmental DNA’ (eDNA) in

68 substrates such as water, soil, or faeces. A recent variation of eDNA metabarcoding, known  
69 as 'invertebrate-derived DNA' (iDNA) metabarcoding, targets the genetic material of prey or  
70 host species extracted from copro-, sarco- or haematophagous invertebrates. Examples  
71 include ticks [1], blow or carrion flies [2, 3, 4, 5], mosquitoes [6, 7, 8, 9] and leeches [10, 11,  
72 12,13]. Many of these parasites are ubiquitous, highly abundant, and easy to collect, making  
73 them an ideal source of biodiversity data, especially for terrestrial vertebrates that are  
74 otherwise difficult to detect [14, 15, 10]. In particular, the possibility for bulk collection and  
75 sequencing in order to screen large areas and minimise costs is attractive. However, most of  
76 the recent studies on iDNA studies focus on single-specimen DNA extracts and Sanger  
77 sequencing, and thus are not making use of the advances of HTS and a metabarcoding  
78 framework for carrying out larger scale biodiversity surveys.

79 That said, e/iDNA metabarcoding also poses several challenges, due to the low quality and  
80 low amounts of target DNA available, relative to non-target DNA (including the high-quality  
81 DNA of the live, invertebrate vector). In bulk iDNA samples comprised of many invertebrate  
82 specimens, this problem is further exacerbated by the variable time since each individual  
83 has fed, if at all, leading to differences in the relative amount and degradation of target DNA  
84 per specimen. This makes e/iDNA studies similar to ancient DNA samples, which also pose  
85 the problem of low quality and low amounts of target DNA [16, 17]. The great disparity in  
86 the ratio of target to non-target DNA and the low overall amount of the former requires an  
87 enrichment step, which is achieved via the amplification of a short target sequence  
88 (amplicon) by polymerase chain reaction (PCR), to obtain enough target material for  
89 sequencing. However, this enrichment step can result in false-positive species detections,  
90 either through contamination or through volatile short PCR amplicons in the laboratory, and  
91 false negative results, through primer bias and low concentrations of template DNA.  
92 Although laboratory standards to prevent and control for such false results are well  
93 established in the field of ancient DNA, there are still no best-practice guidelines for e/iDNA  
94 studies, and thus few studies sufficiently account for such problems (but see [18]).

95 The problem is exacerbated by the use of 'universal' primers used for the PCR, which  
96 maximise the taxonomic diversity of the amplified sequences. This makes the method a  
97 powerful biodiversity assessment tool, even where little is known *a priori* about which  
98 species might be found. However, using such primers, in combination with low quality and  
99 quantity of target DNA, which often requires a high number of PCR cycles to generate  
100 enough amplicon products for sequencing, makes metabarcoding studies particularly  
101 vulnerable to false-results [13, 19; 20]. The high number of PCR cycles, combined with the  
102 high sequencing depth of HTS, also increase the likelihood that contaminants are amplified  
103 and detected, possibly to the same or greater extent as some true-positive trace DNA. As  
104 e/iDNA have been proposed as tools to detect very rare and priority conservation species  
105 such as the Saola, *Pseudoryx nghetinhensis* [10], false detection might result in misguided  
106 conservation activities worth several hundreds of thousands of US dollars e.g. [21].  
107 Therefore, similar to ancient DNA studies, great care must be taken to minimise the

108 possibility for cross-contamination in the laboratory and to maximise the correct detection  
109 of species through proper experimental design. Replication in particular is an important tool  
110 for reducing the incidence of false negatives and detection of false positives but the trade-  
111 off is increased cost, workload, and analytical complexity [19].

112 A second source of false-positive species detections is the incorrect assignment of  
113 taxonomies to the millions of short HTS reads generated by metabarcoding. Although there  
114 has been a proliferation of tools focused on this step, most can be categorised into just  
115 three groups depending on whether the algorithm utilises sequence similarity searches,  
116 sequence composition models, or phylogenetic methods [22, 23, 24]. The one commonality  
117 among all methods is the need for a reliable reference database of correctly identified  
118 sequences, yet there are few curated databases currently appropriate for use in e/iDNA  
119 metabarcoding. Two exceptions are SILVA [25] for the nuclear markers SSU and LSU rRNA  
120 used in microbial ecology, and BOLD (Barcode of Life Database; citation) for the COI 'DNA  
121 barcode' region. For other loci, a non-curated database downloaded from the INSDC  
122 (International Nucleotide Sequence Database Collaboration, e.g. GenBank) is generally used.  
123 However, the INSDC places the burden for metadata accuracy, including taxonomy, on the  
124 sequence submitters, with no restriction on sequence quality or veracity. For instance,  
125 specimen identification is often carried out by non-specialists, which increases error rates,  
126 and common laboratory contaminant species (e.g. human DNA sequences) are submitted in  
127 lieu of the sample itself. The rate of sequence mislabelling has not been assessed for  
128 GenBank, but for several curated microbial databases (Greengenes, LTP, RDP, SILVA),  
129 mislabelling rates have been estimated at between 0.2% and 2.5% [26]. It is likely that the  
130 true proportion of mislabelled samples in GenBank is higher than this given the lack of  
131 professional curation. Moreover, correctly identifying such errors is labour-intensive, so  
132 most metabarcoding studies simply base their taxonomic assignments on sequence-  
133 similarity searches of the whole INSDC database (e.g. with BLAST) [3, 10, 12] and thus can  
134 only detect errors if assignments are ecologically unlikely. Furthermore, reference  
135 sequences for the species that are likely to be sampled in iDNA studies are often  
136 underrepresented in or absent from these databases, which increases the possibility of  
137 incorrect assignment. For instance, fewer than 50% of species occurring in a tropical  
138 megadiverse rainforest are represented in Genbank (see findings below). When species-  
139 level matches are ambiguous, it might still be possible to assign a sequence to a higher  
140 taxonomic rank by using an appropriate algorithm such as MEGAN's Lowest Common  
141 Ancestor [27] or *PROTAX* [28].

142 We present here a complete laboratory workflow and complementary bioinformatics  
143 pipeline, starting from DNA extraction to taxonomic assignment of HTS reads using a  
144 curated reference database. The laboratory workflow allows for efficient screening of  
145 hundreds of e/iDNA samples: (1) two *extraction replicates* are separated during DNA  
146 extraction, and each is sequenced in two *PCR replicates* (Fig. 1); (2) a 'twin-tagged', two-step  
147 PCR protocol prevents cross-sample contamination as no unlabelled PCR products are

148 produced (Fig. 2); (3) robustness of the taxonomic assignment is improved by using up to  
149 three mitochondrial markers. Our bioinformatics pipeline includes a standardized,  
150 automated, and replicable approach to create a curated database, which allows updating as  
151 new reference sequences become available, and to be expanded to other amplicons with  
152 minimal additional effort. We also provide scripts for processing the raw data to quality-  
153 controlled dereplicated reads and for taxonomic assignment of these reads using *PROTAX*  
154 [28], a probabilistic method that has been shown to be robust even when reference  
155 databases are incomplete [23, 4] (all scripts are available from URL  
156 <https://github.com/alexcrampton-platt/screenforbio-mbc>).

## 157 **Methods**

### 158 iDNA samples

159 We used 242 collections of haematophagous terrestrial leeches stored in *RNALater* (Sigma-  
160 Aldrich, Munich -Germany) from Deramakot Forest Reserve in Sabah, Malaysian Borneo as  
161 samples. Each sample consisted of one to 77 leech specimens (median 4). In total, 1532  
162 leeches were collected, exported under the permit (JKM/MBS.1000-2/3 JLD.2 (8) issued by  
163 the Sabah Biodiversity Council), and analysed at the laboratories of the Leibniz-IZW.

### 164 Laboratory workflow

165 The laboratory workflow is designed to both minimize the risk of sample cross-  
166 contamination and to aid identification of any instances that do occur. All laboratory steps  
167 (extraction, pre and post PCR steps, sequencing) took place in separate laboratories and no  
168 samples or materials were allowed to re-enter upstream laboratories at any point in the  
169 workflow. All sample handling was carried out under specific hoods that were wiped with  
170 bleach, sterilized, and UV irradiated for 30 minutes after each use. All labs are further UV  
171 irradiated for four hours each night.

### 172 *DNA extraction*

173 DNA was extracted from each sample in bulk. Leeches were cut into small pieces with a  
174 fresh scalpel blade and incubated in lysate buffer (proteinase K and ATL buffer at a ratio of  
175 1:10; 0.2 ml per leech) overnight at 55 °C (12 hours minimum) in an appropriately sized  
176 vessel for the number of leeches (2 or 5 ml reaction tube). For samples with more than 35  
177 leeches, the reaction volume was split in two and recombined after lysis.

178 Each lysate was split into two *extraction replicates* (A and B; maximum volume 600 µl) and  
179 all further steps were applied to these independently. We followed the DNeasy 96 Blood &  
180 Tissue protocol for animal tissues (Qiagen, Hilden -Germany) on 96 plates for clean-up. DNA  
181 was eluted twice with 100 µl TE buffer. DNA concentration was measured with PicoGreen  
182 dsDNA Assay Kit (Quant-iT, ThermoFisherScientific, Waltham -USA) in 384-well plate format  
183 using an appropriate plate reader (200 PRO NanoQuant, Tecan Trading AG, Männedorf -  
184 Switzerland). Finally, all samples were diluted to a maximum concentration of 10 ng/µl.



185 *Shot-gun sequencing to quantify mammalian DNA content*

186 To estimate the proportion of mammalian DNA in the leech samples, we ran a 75-cycle  
187 paired-end, shot-gun sequencing on an Illumina MiSeq on a subset of 58 samples. We used  
188 BLAST to compare the reads to GenBank and used MEGAN to find the lowest common  
189 ancestor for each read.

190 *PCR*

191 *Two-round PCR protocol.* – We amplified three mitochondrial markers – a short 93 bp  
192 fragment of *16S* rRNA (*16S*), a 389 bp fragment of *12S* rRNA (*12S*), and a 302 bp fragment of  
193 cytochrome b (*CytB*). For each marker, we ran a two-round PCR protocol (Figs. 1, 2). The  
194 first round amplified the target gene. The second round added the Illumina adapters for  
195 sequencing.

196 *Primer design.* – We used ‘twin-tagged’ PCR primers, meaning that *both* the forward and  
197 reverse primers were given the *same* sample-identifying sequence (i.e. ‘tags’) added as  
198 primer extensions (Fig. 2). This ensured that unlabelled PCR products were never produced  
199 and allowed us later to detect and delete tag jumping events [29] (Fig. 2). Primer sequences  
200 are in Table 1 [30, 31].

201 In the first PCR round, we used 25 different 5-bp *sample*-identifying tags (*tag 1*), with a  
202 minimum pairwise distance of three (Faircloth et al, 2012; Supplement Table 1). These  
203 primers also contained different forward and reverse sequences (*Read 1 & Read 2 sequence*  
204 *primers*) (Supplement table 1) to act priming sites for the second PCR round (Fig. 2).

205 In the second PCR round, we used 20 different 5-bp *plate*-identifying tags (*tag 2*), with a  
206 minimum pairwise distance of three [32]. These primers also contained the Illumina P5 and  
207 P7 adapter sequences (Fig. 2). The product of the second PCR round could thus be cleaned  
208 up, quantified, pooled, and sequenced without needing to carry out a separate library  
209 preparation step (e.g. Nextera, TruSeq).

210 *Cycle number considerations.* – Because we know that our target DNA is at low  
211 concentration in the samples, we are faced with a trade-off between (1) using fewer PCR  
212 cycles (e.g. 30 cycles) to minimise amplification bias (caused by some target DNA binding  
213 better to the primer sequences and thus outcompeting during PCR other target sequences  
214 that bind less well, [33]) and (2) using more PCR cycles (e.g. 40 cycles) to ensure that low-  
215 concentration target DNA is sufficiently amplified in the first place. Rather than choose  
216 between these two extremes, we ran both low- and a high-cycle protocols and sequenced  
217 both sets of amplicons.

218 Thus, each of the two *extraction replicates* A and B was split and amplified using different  
219 cycle numbers (*PCR replicates* 1 and 2) for a total of four (= 2 *extraction replicates* X 2 *PCR*  
220 *replicates* -> A1/A2 and B1/B2 ) replicates per sample per marker (Fig. 1). For *PCR replicates*  
221 A1/B1, we used 30 cycles in the first PCR round to minimize the effect of amplification bias.  
222 For *PCR replicates* A2/B2, we used 40 cycles in the first PCR round to increase the likelihood  
223 of detecting species with very low input DNA (Fig. 1).

224 *PCR protocol.* – The first-round PCR reaction volume was 20 µl, including 0.1 µM primer mix,  
225 0.2 mM dNTPs, 1.5 mM MgCl<sub>2</sub>, 1x PCR buffer, 0.5 U AmpliTaq Gold™ (Invitrogen, Karlsruhe -  
226 Germany), and 2 µl of template DNA. Initial denaturation was 5 minutes at 95°C, followed  
227 by repeated cycles of 30 seconds at 95°C, 30 seconds at 54°C, and 45 seconds at 72°C. Final  
228 elongation was 5 minutes at 72°C. Samples were amplified in batches of 24 plus a negative  
229 (water) and a positive control (bank vole, *Myodes glareolus* DNA). All three markers were  
230 amplified simultaneously for each batch of samples in a single PCR plate. Non-target by-  
231 products were removed as required from some *12S* PCRs by purification with magnetic  
232 Agencourt AMPure beads (Beckman Coulter, Krefeld -Germany).

233 In the second-round PCR, we used the same PCR protocol as above with 2 µl of the product  
234 of the first-round PCR and 10 PCR cycles.

#### 235 *Quality control and sequencing*

236 Amplification was visually verified after the second-round PCR by gel electrophoresis on  
237 1.5% agarose gels. Controls were additionally checked with a TapeStation 2200 (D1000  
238 ScreenTape assay, Agilent, Waldbronn -Germany). All samples were purified with AMPure  
239 beads, using a beads-to-template ratio of 0.7:1 for *12S* and *CytB* products, and a ratio of 1:1  
240 for *16S* products. DNA concentration was measured with PicoGreen dsDNA as described  
241 above. Sequencing libraries were made for each PCR plate by equimolar pooling of all  
242 positive samples; final concentrations were between 2 and 4 nmol. Generally, *12S* and *CytB*  
243 products were combined in a single library, whereas *16S* products were always separate,  
244 because of the difference in amplicon length. Up to 11 libraries were sequenced on each run  
245 of Illumina MiSeq following standard protocols. Libraries were sequenced with MiSeq  
246 Reagent Kit V3 (600 cycles, 300 bp paired-end reads) and had a final concentration of 11 pM  
247 spiked with 20 to 30% of PhiX control.

#### 248 Establishment of the tetrapod reference database

##### 249 *Reference database*

250 A custom bash script was written to generate a tetrapod reference database for each of the  
251 three markers, and additionally for a 250 bp mitochondrial cytochrome *c* oxidase subunit I  
252 amplicon (*COI*), which has previously been used in iDNA studies [2]. An important time-  
253 saving step was the use of the FASTA-formatted MIDORI mitochondrial databases [34]. The  
254 script updated the FASTA files for a subset of target species, removed errors and  
255 redundancy, and output FASTA files with species names and GenBank accessions in the  
256 headers. The script accepts four data inputs, two of which are optional. The required inputs  
257 are: (i) the MIDORI sequences (December 2015 ‘UNIQUE’, downloaded from  
258 <http://www.reference-midori.info/download.php#>) for the relevant genes and (ii) an initial  
259 reference taxonomy. This taxonomy is needed to find or generate a full taxonomic  
260 classification for each sequence. Here we used the Integrated Taxonomic Information  
261 System (ITIS) classification for Tetrapoda, obtained with the R package *taxize* version 0.9.0  
262 [35], functions *downstream* and *classification*). The optional inputs are: (iii) supplementary  
263 FASTA files of reference sequences that should be added to the database, and (iv) a list of

264 target species to be queried on GenBank to capture any sequences published since the  
265 MIDORI set was generated. For this study, 72 recently published [36] and 7 unpublished  
266 partial mitochondrial mammal genomes (Accession Numbers MH464789, MH464790,  
267 MH464791, MH464792, MH464793, MH464794, MH464795, MH464796, MH464797,  
268 MH464798, MH464799, MH464800, MH464801) were added as input (iii). A list of 103  
269 mammal species known to be present in the sampling area was added as input (iv).

270 With the above inputs, the seven curation steps are: 1) remove sequences not identified to  
271 species; 2) add any extra sequences from optional inputs (iii) and (iv) above; 3) select the  
272 target amplicon; 4) remove sequences with ambiguities; 5) compare species labels to the  
273 reference taxonomy from input (ii) and create a consensus taxonomy including any species  
274 known only from sequence data if genus already exists in reference; 6) identify and remove  
275 putatively mislabelled sequences; 7) discard redundant sequences, retaining one  
276 representative per haplotype per species.

277 The script is split into four modules, allowing optional manual curation at three key steps.  
278 The steps covered by each of the four modules are summarized in Table 2. The main  
279 programs used are highlighted and cited in the text where relevant, but many intermediate  
280 steps used common UNIX tools and unpublished lightweight utilities freely available from  
281 GitHub (Table 3).

282 *Module 1* - The first step is to select the tetrapod sequences from the MIDORI database for  
283 each of the four selected loci (input (i) above). This, and the subsequent step to discard  
284 sequences without strict binomial species names and reduce subspecies identifications to  
285 species-level, are made possible by the inclusion of the full NCBI taxonomic classification of  
286 each sequence in the FASTA header by the MIDORI pipeline. The headers of the retained  
287 sequences are then reformatted to include just the species name and GenBank accession  
288 separated by underscores. If desired, additional sequences from local FASTA files are then  
289 added to the MIDORI set (input (iii)). The headers of these FASTA files are required to be in  
290 the same format. Next, optional queries are made to the NCBI GenBank and RefSeq  
291 databases for each species in a provided list (input (iv)) for each of the four target loci, using  
292 NCBI's Entrez Direct [37]. Matching sequences are downloaded in FASTA format, sequences  
293 prefixed as "UNVERIFIED" are discarded, the headers are simplified as previously, and those  
294 sequences not already in the MIDORI set are added. The region of each sequence matching  
295 to the relevant target marker was extracted with a two-step process in which *usearch* (-  
296 *search\_pcr*) was used to select sequences where both primers were present, and these  
297 were in turn used as a reference to select partially matching sequences with *blastn* [38, 39].  
298 Sequences with a hit length of at least 90% of the expected marker length were retained by  
299 extracting the relevant subsequence based on the BLAST hit co-ordinates. Sequences with  
300 ambiguous bases were discarded at this stage. In the final step in module 1 a multiple-  
301 sequence alignment was generated with MAFFT [40, 41] for each partially curated amplicon  
302 dataset. The script then breaks to allow the user to check for any obviously problematic  
303 sequences that should be discarded before continuing.

304 *Module 2* - The species labels of the edited alignments are compared with the reference  
305 taxonomy (input (ii)). Any species not found is queried against the Catalogue of Life  
306 database (CoL) via *taxize* in case these are known synonyms, and their correct species label  
307 and classification is added to the reference taxonomy. The original species label is retained  
308 as a key to facilitate sequence renaming, and a note is added to indicate its status as a  
309 synonym. Finally, the genus name of any species not found in the CoL is searched against  
310 the consensus taxonomy, and if found, the novel species is added by taking the higher  
311 classification levels from of the other species in the genus. Orphan species labels are printed  
312 to a text file, and the script breaks to allow the user to check this list and manually create  
313 classifications for some or all if appropriate.

314 *Module 3* - This module begins by checking for any manually generated classification files  
315 (from the end of Module 2) and merging them with the reference taxonomy from Module 2.  
316 Any remaining sequences with unverifiable classifications are removed at this step. The next  
317 steps convert the sequences and taxonomy file to the correct formats for SATIVA [26].  
318 Sequence headers in the edited MAFFT alignments are reformatted to include only the  
319 GenBank accession and a taxonomy key file is generated with the correct classification listed  
320 for each accession number. In cases where the original species label was found to be a  
321 synonym, the corrected label is used. Putatively mislabelled sequences in each amplicon are  
322 then detected with SATIVA, and the script breaks to allow inspection of the results. The user  
323 may choose to make appropriate edits to the taxonomy key file or list of putative mislabels  
324 at this point.

325 *Module 4* - Any sequences that are still flagged as mislabelled at the start of the fourth  
326 module are deleted from the SATIVA input alignments, and all remaining sequences are  
327 relabelled with the correct species name and accession. A final consensus taxonomy file is  
328 generated in the format required by *PROTAX*. Alignments are subsequently unaligned prior  
329 to species-by-species selection of a single representative per unique haplotype. Sequences  
330 that are the only representative of a species are automatically added to the final database.  
331 Otherwise, all sequences for each species are extracted in turn, aligned with MAFFT, and  
332 collapsed to unique haplotypes with *collapsetypes\_4.6.pl* (zero differences allowed; [42]).  
333 Representative sequences are then unaligned and added to the final database.

334 Bioinformatics workflow

335 *Read processing*

336 Although the curation of the reference databases is our main focus, it is just one part of the  
337 bioinformatics workflow for e/iDNA metabarcoding. A custom bash script was used to  
338 process raw basecall files to demultiplexed, cleaned, and dereplicated reads in FASTQ  
339 format on a run-by-run basis. All runs and amplicons were processed with the same settings  
340 unless otherwise indicated. *bcl2fastq* (Illumina) was used to convert basecall files to  
341 demultiplexed, paired-end FASTQ files for each library, allowing up to 1 mismatch in each  
342 *tag 2*. Each library was further demultiplexed into samples via unique *tag 1* pairs with  
343 *AdapterRemoval* (Schubert, Lindgreen and Orlando 2016), again allowing up to 1 mismatch

344 in each tag. These steps allowed reads to be assigned to the correct samples via their four  
345 tags e.g. ABBA, ADDA, BDDB.

346 In all cases, amplicons were short enough to expect paired reads to overlap. Pairs were  
347 merged with *usearch* (*-fastq\_mergepairs*; [43; 44]), and only successfully merged pairs were  
348 retained. Primer sequences were trimmed with *cutadapt* [45], and only successfully  
349 trimmed reads at least 90% of expected amplicon length were passed to a quality filtering  
350 step with *usearch* (*-fastq\_filter*). Lastly, reads were dereplicated with *usearch* (*-*  
351 *derep\_fulllength*) to retain only unique sequences, and singletons were discarded. The  
352 number of replicates that each unique sequence represented was also added to the read  
353 header at this step (option *-sizeout*).

#### 354 *Taxonomic assignment*

355 The curated reference sequences and associated taxonomy were used for taxonomic  
356 classification of dereplicated reads using *PROTAX*, a recently published probabilistic method  
357 [28, 24]. *PROTAX* gives unbiased estimates of placement probability for each read at each  
358 taxonomic rank, allowing some assignments to be made to a higher rank even when there is  
359 a high degree of uncertainty at the species level. In other words, and unlike other taxonomic  
360 assignment methods, *PROTAX* can estimate the probability that a sequence belongs to a  
361 taxon that is not included in the reference database. This was considered an important  
362 feature due to the expected incompleteness of the reference databases for tetrapods in the  
363 sampled location. As other studies have compared *PROTAX* with more established methods,  
364 e.g. MEGAN [27] (see [28, 4]), it was beyond the scope of this study to evaluate the  
365 performance of *PROTAX*.

366 Classification with *PROTAX* is a two-step process. Firstly, *PROTAX* selected a subset of the  
367 reference database that was used as training data to parameterise a *PROTAX* model for  
368 each marker, and secondly, the fitted models were used to assign four taxonomic ranks  
369 (species, genus, family, order) to each of the dereplicated reads, along with a probability  
370 estimate at each level. We also included the best similarity score of the assigned species or  
371 genus, mined from the LAST results (see below) for each read. This was helpful for flagging  
372 problematic assignments for downstream manual inspection, i.e. high probability  
373 assignments based on low similarity scores (implying that there are no better matches  
374 available) and low probability assignments based on high similarity scores (indicates  
375 conflicting database signal from several species with highly similar sequences).

376 Fitting the *PROTAX* model followed Somervuo et al. [24] except that 5000 training  
377 sequences were randomly selected for each target marker due to the large size of the  
378 reference database. In each case, 4500 training sequences represented a mix of known  
379 species with reference sequences (conspecific sequences retained in the database) and  
380 known species without reference sequences (conspecific sequences omitted, simulating  
381 species missing from the database), and 500 sequences represented previously unknown  
382 lineages distributed evenly across the four taxonomic levels (i.e. mimicked a mix of  
383 completely novel species, genera, families and orders). Pairwise sequence similarities of

384 queries and references were calculated with LAST [46] following the approach of Somervuo  
1 385 et al. [24]. The models were weighted towards the Bornean mammals expected in the  
2 386 sampled area by assigning a prior probability of 90% to these 103 species and a 10%  
3 387 probability to all others ([24]; Supplement table 2). In cases of missing interspecific variation  
4 388 this helped to avoid unlikely assignments, especially in case of the very short 93 bp fragment  
5 389 of *16S*. Maximum *a posteriori* (MAP) parameter estimates were obtained following the  
6 390 approach of Somervuo et al. [28], but the models were parameterised for each of the four  
7 391 taxonomic levels independently, with a total of five parameters at each level (four  
8 392 regression coefficients and the probability of mislabelling).

13 393 Dereplicated reads for each sample were then classified using a custom bash script on a run-  
14 394 by-run basis. For each sample, reads in FASTQ format were converted to FASTA, and  
15 395 pairwise similarities were calculated against the full reference sequence database for the  
16 396 applicable marker with LAST. Assignments of each read to a taxonomic node based on these  
17 397 sequence similarities were made using a Perl script and the trained model for that level. The  
18 398 taxonomy of each node assignment was added with a second Perl script for a final table  
19 399 including the node assignment, probability, taxonomic level, and taxonomic path for each  
20 400 read. Read count information was included directly in the classification output via the size  
21 401 annotation added to the read headers during dereplication. All Perl scripts to convert input  
22 402 files into the formats expected by *PROTAX*, *R* code for training the model following  
23 403 Somervuo et al. [24], and Perl scripts for taxonomic assignment were provided by P.  
24 404 Somervuo (personal communication).

#### 31 405 *Acceptance criteria*

32 406 In total we had twelve PCR reactions per sample: two *extraction replicates A and B* X two  
33 407 *PCR replicates 1 and 2* per extraction replication X the three markers (Fig. 1). We only  
34 408 accepted taxonomic assignments that were positively detected in both *extraction replicates*  
35 409 (*A & B*, Figure 3). The reason for conservatively omitting assignments that appeared in only  
36 410 one extraction replicate was to rule out sample cross-contamination during DNA extraction.  
37 411 In addition, we only accepted assignments with ten or more reads per marker, if only one  
38 412 marker was sequenced. If a species was assigned in more than one marker (e.g. *12S* and  
39 413 *16S*), we accepted the assignment even if in one sequencing run the number of reads was  
40 414 below ten.

41 415 Due to the imperfect PCR amplification of markers (the small *16S* fragment amplified better  
42 416 than the longer *CytB* fragment) and missing reference sequences in the database or shared  
43 417 sequence motifs between species, reads sometimes were assigned to species level for one  
44 418 marker but only to genus level for another marker. Thus, the final identification of species  
45 419 could not be automated and manual inspection and curation was needed. For each  
46 420 assignment, three parameters were taken into consideration: number of sequencing reads,  
47 421 the mean probability estimate derived from *PROTAX*, and the mean sequence similarity to  
48 422 the reference sequences based on LAST.

## 423 Findings & Discussion

### 424 *Database curation*

425 The MIDORI UNIQUE database (December 2015 version) contains 1,019,391 sequences  
426 across the four mitochondrial loci of interest (*12S*: 66,937; *16S*: 146,164; *CytB*: 223,247; *COI*:  
427 583,043), covering all Metazoa. Of these, 258,225 (25.3%) derive from the four tetrapod  
428 classes (Amphibia: 55,254; Aves: 51,096; Mammalia: 101,106; Reptilia: 50,769). The  
429 distribution of these sequences between classes and loci, and the losses at each curation  
430 step are shown in Figure 4. In three of the four classes, there is a clear bias towards *CytB*  
431 sequences, with over 50% of sequences derived from this locus. In both Aves and  
432 Mammalia, the *16S* and *12S* loci are severely underrepresented at less than 10% each, while  
433 for Reptilia, *COI* is the least sequenced locus in the database.

434 The numbers of sequences and rates of loss due to our curation steps varied among  
435 taxonomic classes and the four loci, although losses were observed between steps in almost  
436 all instances. The most significant losses followed amplicon selection and removal of non-  
437 unique sequences. Amplicon selection led to especially high losses in Amphibia and *16S*,  
438 indicating that data published on GenBank for this class and marker do not generally overlap  
439 with the primer sets used here. Meanwhile, the high level of redundancy in public databases  
440 was highlighted by the significant reduction in the number of sequences during the final  
441 step of removing redundant sequences – in all cases over 10% of sequences were discarded,  
442 but some losses exceeded 50% (Mammalia: *COI*, *CytB*, *16S*; Amphibia: *16S*).

443 Data loss due to apparent mislabelling ranged between 1.9% and 7.4% and was thus  
444 generally higher than similar estimates for curated microbial databases [26]. SATIVA flags  
445 potential mislabels and suggests an alternative label supported by the phylogenetic  
446 placement of the sequences, allowing the user to make an appropriate decision on a case by  
447 case basis. The pipeline pauses after this step to allow such manual inspection to take place.  
448 However, for the current database, the number of sequences flagged was large (4378 in  
449 total), and the required taxonomic expertise was lacking, so all flagged sequences from non-  
450 target species were discarded to be conservative. The majority of mislabels were identified  
451 at species level (3053), but there were also significant numbers at genus (788), family (364)  
452 and order (102) level. Two to three sequences from Bornean mammal species were  
453 unflagged in each amplicon to retain the sequences in the database. This was important as  
454 in each case these were the only reference sequences available for the species. Additionally,  
455 *Muntiacus vaginalis* sequences that were automatically synonymised to *M. muntjak* based  
456 on the available information in the Catalogue of Life were revised back to their original  
457 identifications to reflect current taxonomic knowledge.

### 458 *Database composition*

459 The final database was skewed even more strongly towards *CytB* than was the raw  
460 database. It was the most abundant locus for each class and representing over 60% of  
461 sequences for both Mammalia and Reptilia. In all classes, *16S* made up less than 10% of the  
462 final database, with Reptilia *COI* also at less than 10%.

463 Figure 5 (frequency distributions) shows that most species represented in the curated  
464 database for any locus have just one unique haplotype against which HTS reads can be  
465 compared, while a few species have many haplotypes. The prevalence of species with 20 or  
466 more haplotypes is particularly notable in *CytB* where the four classes have between 25  
467 (Aves) and 265 (Mammalia) species in this category. Figure 5 (coloured circles in each plot)  
468 also shows, that the species in the taxonomy are incompletely sampled across all loci, but  
469 coverage varies significantly between categories. In spite of global initiatives to generate  
470 *COI* sequences [47], this marker does not offer the best species-level coverage in any class  
471 and is a poor choice for Amphibia and Reptilia (<15% of species included). Even the best  
472 performing marker, *CytB*, is not a universally appropriate choice, as Amphibia is better  
473 covered by *12S*. These differences in underlying database composition will impact the  
474 likelihood of obtaining accurate taxonomic assignment for any one species from any single  
475 marker. Further barcoding campaigns are clearly needed to fill gaps in all markers and all  
476 classes to increase the power of future e/iDNA studies. As the costs of HTS decrease, we  
477 expect that such gap-filling will increasingly shift towards whole mitochondrial genomes  
478 [36], reducing the effect of marker choice on detection likelihood. In the meantime,  
479 however, the total number of species covered by the database can be increased by  
480 combining multiple loci (here, up to four) and thus the impacts of database gaps on  
481 correctly detecting species can be minimized ([48]; Fig. 6).

482 In the present study, the primary target for iDNA sampling was the mammal fauna of  
483 Malaysian Borneo, and the 103 species expected in the sampling area represent an  
484 informative case study highlighting the deficiencies in existing databases (Fig. 6). Nine  
485 species are completely unrepresented while only slightly over half (554 species) have at  
486 least one sequence for all of the loci. Individually, each marker covers over half of the target  
487 species, but none achieves more than 85% coverage (*12S*: 75 species; *16S*: 68; *CytB*: 88; *COI*:  
488 66). Equally striking is the lack of within-species diversity, as most of the incorporated  
489 species are represented by only a single haplotype per locus. Some of the species have large  
490 distribution ranges, so it is likely that in some cases the populations on Borneo differ  
491 genetically from the available reference sequences, possibly limiting assignment success.  
492 Only a few expected species have been sequenced extensively, and most are of economic  
493 importance to humans (e.g. *Bos taurus*, *Bubalus bubalis*, *Macaca* spp, *Paradoxurus*  
494 *hermaphroditus*, *Rattus* spp, *Sus scrofa*), with as many as 100 haplotypes available (*Canis*  
495 *lupus*). Other well-represented species ( $\geq 20$  haplotypes) present in the sampling area  
496 include several Muridae (*Chiropodomys gliroides*, *Leopoldamys sabanus*, *Maxomys surifer*,  
497 *Maxomys whiteheadi*) and leopard cat (*Prionailurus bengalensis*).

#### 498 *Laboratory workflow*

499 Shotgun sequencing of a subset of our samples revealed that the median mammalian DNA  
500 content was only 0.9%, ranging from 0% to 98%. These estimates are approximate, but with  
501 more than 75% of the samples being below 5%, this shows clearly the scarcity of target DNA  
502 in bulk iDNA samples. The generally low DNA content and the fact that the target DNA is



1 503 often degraded make enrichment of the target barcoding loci necessary. We used PCR with  
2 504 high cycle numbers to obtain enough DNA for sequencing. However, this second step  
3 505 increases the risk of PCR error: artificial sequence variation, non-target amplification, and/or  
4 506 raising contaminations up to a detectable level.

5  
6 507 We addressed these problems by running two *extraction replicates*, two *PCR replicates*, and  
7  
8 508 a multi-marker approach. The need for *PCR replicates* has been acknowledged and  
9  
10 509 addressed extensively in ancient DNA studies [16] and has also been highlighted for  
11 510 metabarcoding studies [18, 19, 20, 49]. Despite this, many e/iDNA studies do not carry out  
12 511 multiple *PCR replicates* to detect and omit potential false sequences. In addition, *extraction*  
13 512 *replicates* are seldom applied, despite the evidence that cross-sample DNA contamination  
14 513 can occur during DNA extraction [50, 51, 52]. Here we only accepted sequences that  
15 514 appeared in a minimum of two independent PCRs, one from each *extraction replicate A* and  
16 515 *B* (Fig. 1).

17  
18  
19  
20 516 We also used three different loci to correct for potential PCR-amplification biases. We were,  
21 517 however, unable to quantify this bias in this study due to the high degradation of the target  
22 518 mammalian DNA, which resulted in much higher overall amplification rates for *16S*, the  
23 519 shortest of our PCR amplicons. For *16S*, 85% of the samples amplified, whereas for *CytB* and  
24 520 *12S*, only 57% and 44% amplified, respectively. Despite the greater taxonomic resolution of  
25 521 the longer *12S* and *CytB* fragments, our poorer amplification results for these longer  
26 522 fragments emphasize that e/iDNA studies should generally focus on short PCR fragments to  
27 523 increase the likelihood of positive amplifications of the degraded target DNA. In the case of  
28 524 mammal-focussed e/iDNA studies, a shorter (100 bp) *CytB* fragment will likely be very  
29 525 useful.

30  
31  
32  
33  
34  
35  
36 526 Our second major precaution was the use of twin-tagging for both PCRs (Fig. 2). This ensures  
37 527 that unlabelled PCR products are never produced and allows us to multiplex a large number  
38 528 of samples on a single run of Illumina MiSeq run. Just 24 sample *tags 1* and 20 plate *tags 2*  
39 529 allow the differentiation of up to 480 samples. This greatly reduced sequencing and primer  
40 530 purchase costs while also largely eliminating sample-misassignment via tag jumping,  
41 531 because tag jump sequences have non-matching forward and reverse *tag 1* sequences [29].  
42 532 For our sequenced PCR plates, the rate of correct matching *tag 2* tags was 96%. We  
43 533 estimated the rate of tag jumps producing chimeric *tag 1* sequences to be of 1 to 5 % and  
44 534 these were removed from the dataset (Table 4). Twin-tagging increases costs because of the  
45 535 need to purchase a larger number of primer pairs. However, the risk of reporting false  
46 536 positives should compensate this, especially when it comes to rare or threatened species.

47  
48  
49  
50  
51  
52 537 For the second PCR round, we used the same tag pair *tag 2* for all 24 samples of a PCR plate.  
53 538 In order to reduce cost we tested pooling these 24 samples prior to the second PCR round,  
54 539 but we detected a very high tag jumping rate of over 40% (Table 4), which ultimately would  
55 540 increase cost through reduced sequencing efficiency.

1 541 Tagging primers in the first PCR reduces the risk of cross-contamination via aerosolised PCR  
2 542 products. Previous studies have shown that unlabelled volatile PCR products pose a great  
3 543 risk of false detections [53], a risk that is greatly increased if a high number of samples are  
4 544 analysed in the laboratories [13]. Also, in laboratories where other research projects are  
5 545 conducted, this approach allows the detection of cross-experiment contamination.  
6 546 Therefore, we see a clear advantage of our approach over ligation techniques when it  
7 547 comes to producing sequencing libraries, as the Illumina tags are only added after the first  
8 548 PCR, and thus the risk of cross contamination with unlabelled PCR amplicons is very low.

#### 9 549 *Assignment results*

10 550 A robust assignment of species is an important factor in metabarcoding as an incorrect  
11 551 identification might result in incorrect management interventions. The reliability of taxonomic  
12 552 assignments is expected to vary with respect to both marker choice and database  
13 553 completeness, and this is reflected in the probability estimates provided by *PROTAX*. In a  
14 554 recent study, less than 10% of the mammal assignments made at species level against a  
15 555 worldwide reference database were considered reliable with the short 16S amplicon, but  
16 556 this increased to 46% with full-length 16S sequences [24]. In contrast, in the same study  
17 557 over 80% of insect assignments at species level were considered reliable with a more  
18 558 complete, geographically restricted database of full-length COI barcodes. A similar pattern  
19 559 was observed in our data during manual curation of the assignment results – there was  
20 560 more ambiguity in the results for the short 16S amplicon than for other markers. However,  
21 561 due to the limited amount of often degraded target DNA in e/iDNA samples, short  
22 562 amplicons amplify much better. In our case, this had the drawback that some species lacked  
23 563 any interspecific variation, and thus sequencing reads shared 99%-100% identity for several  
24 564 species. For example, our only 16S reference of *Sus barbatus* was 100% identical to *S.*  
25 565 *scrofa*. But as latter species does not occur in the studied area we could assign all reads  
26 566 manually to *S. barbatus*. In several cases we were able to confirm *S. barbatus* by additional  
27 567 *CytB* results, highlighting the advantage of using multiple markers. Another important  
28 568 advantage of multiple markers is the opportunity to fill gaps in the reference database. For  
29 569 example, we lacked 16S reference sequences for *Hystrix brachyura*, and reads were  
30 570 assigned by *PROTAX* only to the genus level: *Hystrix sp.*. In one sample, however, almost  
31 571 5000 *CytB* reads were assigned to *Hystrix brachyura* and thus we used the *Hystrix sp.* 16S  
32 572 sequences in the same sample to build a consensus 16S reference sequence for *Hystrix*  
33 573 *brachyura* for future analyses. We also inferred that PCR and sequencing errors resulted in  
34 574 reads being assigned to sister taxa. We observed that a high number of reads of a true  
35 575 sequence were assigned to a species and a lower number of noise sequences were assigned  
36 576 to a sister taxa. Such a pattern was observed for ungulates, especially deer that showed  
37 577 little variance in 16S. It is hard to identify and control for such pattern automatically, and it  
38 578 highlights the importance of visual inspection of the results.

39 579 In total, we accepted 174 vertebrate detections (i.e. having positive detections in both  
40 580 *extraction replicates A and B*) within 96 bulk samples. 48% of these assignments were

581 present in all four *A1*, *A2*, *B1* and *B2*. 35% were present in at least three of replicates (e.g.  
582 *A1*, *A2*, *B1*). Although the true occurrence of species within our leeches was unknown, by  
583 accepting only positive *AB* assignment results, we increase the confidence of species  
584 detection, even if the total number of reads for that species was low. In almost all cases,  
585 however, the number of reads was high (median= 52,386; mean= 300,996; SD= 326,883).  
586 Keeping this in mind we do not believe that raw read numbers are the most reliable  
587 indicators of tetrapod DNA quantity in iDNA samples. PCR stochasticity, primer biases,  
588 multiple species in individual samples, and pooling of samples exert too many uncertainties  
589 that could bias the sequencing results. Replication of detection is inherently more reliable.  
590 In contrast to our expectation that higher cycle number might be necessary to amplify even  
591 the lowest amounts of target DNA, our data does not support this hypothesis. Although we  
592 observed an increase in positive PCRs for *A2/B2* (the 40-cycle PCR replicates), the total  
593 number of accepted assignments in *A1/B1* and *A2/B2* samples did not differ. This indicates  
594 first that high PCR cycle numbers mainly increased the risk of false positives and second that  
595 our multiple precautions successfully minimized the acceptance of false detections.

## 596 Conclusion

597 Metabarcoding of e/iDNA samples will certainly become a very valuable tool in assessing  
598 biodiversity, as it allows to detect species non-invasively without the need to capture and  
599 handle the animals [54]. However, the technical and analytical challenges linked to sample  
600 types (low quantity and quality DNA) and poor reference databases have so far been  
601 insufficiently recognized. In contrast to ancient DNA studies where standardized laboratory  
602 procedures and specialized bioinformatics pipelines have been established and are followed  
603 in most cases, there is limited methodological consensus in e/iDNA studies, which reduces  
604 rigour. In this study, we present a robust metabarcoding workflow for e/iDNA studies. We  
605 hope that the provided scripts and protocols facilitate further development of rigour in this  
606 field. The use of e/iDNA metabarcoding to study the rarest and most endangered species  
607 such as the saola is exciting, but geneticists bear the heavy responsibility of providing  
608 correct answers to conservationists.

## 609 Acknowledgements

610 All authors thank the German Federal Ministry of Education and Research (BMBF FKZ:  
611 01LN1301A) and the Leibniz-IZW for funding this study. We also thank the Sabah Forestry  
612 Department, especially Johnny Kissing, Peter Lagan and Datuk Sam Mannan for supporting  
613 the fieldwork and the Sabah Biodiversity Council for providing research, collection and export  
614 permits for this work. We are grateful to John Mathai, Seth Timothy Wong for conducting  
615 the field work and collecting the leeches. The laboratory analysis was supported by  
616 Sebastian Wieser.

## References

- [1] Garipey TD, Lindsay R, Odgen N, Greory TR. Identifying the last supper: utility of the DNA barcode library for bloodmeal identification in ticks. *Mol Ecol Res.* 2012; 12: 646-52; doi: 10.1111/j.1755-0998.2012.03140.x
- [2] Lee P-S, Gan HM, Clements GR, Wilson J-J. Field calibration of blowfly-derived DNA against traditional methods for assessing mammal diversity in tropical forests. *Genome* 2016; 59: 1008-22; doi:10.1139/gen-2015-0193
- [3] Calvignac-Spencer S, Merkel K, Kutzner N, et al.. Carrion fly-derived DNA as a tool for comprehensive and cost-effective assessment of mammalian biodiversity. *Mol Ecol.* 2013; 22: 915-24; doi:10.1111/mec.12183
- [4] Rodgers, TW, Xu CCY, Giacalone J, et al.. Carrion fly-derived DNA metabarcoding is an effective tool for mammal surveys: Evidence from a known tropical mammal community. *Mol Ecol Res.* 2017; 17(6): 1-13; doi:10.1111/1755-0998.12701
- [5] Hoffmann C, Merkel K, Sachse A, et al.. Blow flies as urban wildlife sensors. *Mol Ecol Res* 2018; 18(3): 502-10; doi: 10.1111/1755-0998.12754
- [6] Schönberger AC, Wagner S, Tuten HC, et al.. Host preferences in host-seeking and blood-fed mosquitoes in Switzerland. *Med Vet Entomol.* 2015; 30(1): 39-52.
- [7] Taylor L, Cummings RF, Velten R, et al.. Host (Avian) Biting Preference of Southern California *Culex* Mosquitoes (Diptera: Culicidae). *J Med Entomol.* 2012; 49(3): 687-96.
- [8] Townzen JS, Brower AVZ, Judd DD. Identification of mosquito bloodmeals using mitochondrial cytochrome oxidase subunit I and cytochrome b gene sequences. *Med Vet Entomol.* 2008; 22: 386-93.
- [9] Kocher A, Thoisy B, Catzeflies F, et al.. iDNA screening: Disease vectors as vertebrate samplers. *Mol Ecol.* 2017; 26(22): 6478-86.
- [10] Schnell IB, Thomsen PF, Wilkinson N, et al.. Screening mammal biodiversity using DNA from leeches. *Curr Biol.* 2012, 22(8): R262—3.
- [11] Tessler M, Weiskopf SR, Berniker L, et al.. Bloodlines: mammals, leeches, and conservation in southern Asia. *Syst Biodivers.* 2018; 1-9.
- [12] Weiskopf SR, McCarthy KP, Tessler M, et al.. Using terrestrial haematophagous leeches to enhance tropical biodiversity monitoring programmes in Bangladesh. *J Appl Ecol.* 2018: 1-11.
- [13] Schnell IB, Bohmann K, Schultze SE, et al.. Debugging diversity - a pan-continental exploration of the potential of terrestrial blood-feeding leeches as a vertebrate monitoring tool. *Mol Ecol Res.*2018; doi: 10.1111/1755-0998.12912
- [14] Calvignac-Spencer S, Leendertz FH, Gilbert MT, Schubert G. An invertebrate stomach's view on vertebrate ecology: certain invertebrates could be used as "vertebrate

- 653 samplers" and deliver DNA-based information on many aspects of vertebrate ecology.  
654 BioEssays. 2013; 35(11): 1004-13.
- 655 [15] Schnell IB, Sollmann R, Calvignac-Spencer S, et al.. iDNA from terrestrial  
656 haematophagous leeches as a wildlife surveying and monitoring tool – prospects,  
657 pitfalls and avenues to be developed. Front Zool. 2015; 12:24.
- 658 [16] Pääbo S, Poinar H, Serre D, et al.. Genetic analyses from ancient DNA. Annu Rev  
659 Genet. 2004; 38: 645-79.
- 660 [17] Hofreiter M, Paijmans JL, Goodchild H, et al. The future of ancient DNA: Technical  
661 advances and conceptual shifts. BioEssays. 2015; 37(3): 284-93.
- 662 [18] Bonin A, Taberlet P, Zinger L, Coissac E. Environmental DNA: For Biodiversity Research  
663 and Monitoring. 1<sup>st</sup> ed. Oxford University Press; 2018.
- 664 [19] Ficetola GF, Pansu J, Bonin A, et al.. Replication levels, false presences and the  
665 estimation of the presence/absence from eDNA metabarcoding data. Mol Ecol Res.  
666 2014; 15(3): 543-56.
- 667 [20] Ficetola GF, Taberlet P., Coissac E. How to limit false positives in environmental DNA  
668 and metabarcoding? Mol Ecol Res. 2016; 16(3): 604-7.
- 669 [21] Dalton R. Still looking for that woodpecker. Nature. 2010; 463: 718-9.
- 670 [22] Bazinet AL, Cummings MP. A comparative evaluation of sequence classification  
671 programs. BMC bioinformatics. 2012; 13(1): 92.
- 672 [23] Richardson RT, Bengtsson-Palme J, Johnson RM. Evaluating and optimizing the  
673 performance of software commonly used for the taxonomic classification of DNA  
674 metabarcoding sequence data. Mol Ecol Res. 2017; 17(4): 760-9.
- 675 [24] Somervuo P, Yu DW, Xu CC, Ji Y, et al.. Quantifying uncertainty of taxonomic  
676 placement in DNA barcoding and metabarcoding. Methods Ecol Evol. 2017; 8(4): 398-  
677 407.
- 678 [25] Quast C, Gerken J, Schweer T, et al. SILVA Databases. In: Nelson KE. Encyclopedia of  
679 Metagenomics. 1<sup>st</sup> ed. Springer US; 2015. p. 626-635.
- 680 [26] Kozlov AM, Zhang J, Yilmaz P, Glöckner FO, Stamatakis A. (2016). Phylogeny-aware  
681 identification and correction of taxonomically mislabeled sequences. Nucleic Acids  
682 Res. 2016; 44(11): 5022-33.
- 683 [27] Huson DH, Auch AF, Qi J, Schuster SC. MEGAN analysis of metagenomic data. Genome  
684 Res. 2007; 17(3): 377-86.
- 685 [28] Somervuo P, Koskela S, Pennanen J, Henrik Nilsson R, Ovaskainen O. Unbiased  
686 probabilistic taxonomic classification for DNA barcoding. Bioinformatics. 2016; 32(19):  
687 2920-7.

688 [29] Schnell IB, Bohmann K, Gilbert MTP. (2015). Tag jumps illuminated—reducing  
689 sequence-to-sample misidentifications in metabarcoding studies. *Mol Ecol Res.* 2015;  
690 15(6): 1289-1303.

691 [30] Kocher TD, Thomas WK, Meyer A, et al.. Dynamics of mitochondrial DNA evolution in  
692 animals: amplification and sequencing with conserved primers. *Proc. Natl. Acad. Sci.*  
693 U.S.A.. 1989; 86(16): 6196-6200.

694 [31] Taylor PG. Reproducibility of ancient DNA sequences from extinct Pleistocene fauna.  
695 *Mol Biol Evol.* 2996; 13(1): 283-5.

696 [32] Faircloth BC, Glenn TC. Not all sequence tags are created equal: designing and  
697 validating sequence identification tags robust to indels. *PLoS One.* 2012; 7(8): e42543

698 [33] Murray DC, Coghlan ML, Bunce M. From benchtop to desktop: important  
699 considerations when designing amplicon sequencing workflows. *PLoS One.* 2015;  
700 10(4): e0124671.

701 [34] Machida RJ, Leray M, Ho SL, Knowlton N. Metazoan mitochondrial gene sequence  
702 reference datasets for taxonomic assignment of environmental samples. *Sci Data.*  
703 2017; 4: 170027.

704 [35] Chamberlain SA, Szöcs E. taxize: taxonomic search and retrieval in R. Version 2.  
705 *F1000Res.* 2013; 2: 191.

706 [36] Salleh FM, Ramos-Madriral J, Peñaloza F, et al.. An expanded mammal mitogenome  
707 dataset from Southeast Asia. *GigaScience.* 2017; 6(8): 1-8

708 [37] Kans, Jonathan. Entrez Direct: E-utilities on the UNIX Command Line. In: Entrez  
709 Programming Utilities Help [Internet]. Bethesda (MD): National Center for  
710 Biotechnology Information (US). 2010.

711 [38] Altschul SF, Gish W, Miller W, Myers EW, Lipman DJ. Basic local alignment search tool.  
712 *Journal of molecular biology.* 1990; 215(3):, 403-10.

713 [39] Camacho C, Coulouris G, Avagyan V, et al.. BLAST+: architecture and applications. *BMC*  
714 *bioinformatics.* 2009; 10(1): 421.

715 [40] Katoh K, Standley DM. (2013). MAFFT multiple sequence alignment software version  
716 7: improvements in performance and usability. *Mol Biol Evol.* 2013; 30(4): 772-80.

717 [41] Katoh K, Misawa K, Kuma KI, Miyata T. MAFFT: a novel method for rapid multiple  
718 sequence alignment based on fast Fourier transform. *Nucleic Acids Res.* 2002; 30(14):  
719 3059-66.

720 [42] Chesters D. (2013) *collapsetypes.pl* [computer software available at  
721 <http://sourceforge.net/projects/collapsetypes/>]

722 [43] Edgar RC. Search and clustering orders of magnitude faster than BLAST.  
723 *Bioinformatics.* 2010; 26(19): 2460-2461.

1  
2  
3  
4  
5  
6  
7  
8  
9  
10  
11  
12  
13  
14  
15  
16  
17  
18  
19  
20  
21  
22  
23  
24  
25  
26  
27  
28  
29  
30  
31  
32  
33  
34  
35  
36  
37  
38  
39  
40  
41  
42  
43  
44  
45  
46  
47  
48  
49  
50  
51  
52  
53  
54  
55  
56  
57  
58  
59  
60  
61  
62  
63  
64  
65

724 [44] Edgar RC, Flyvbjerg H. Error filtering, pair assembly and error correction for next-  
725 generation sequencing reads. *Bioinformatics*. 2015; 31(21): 3476-82.

726 [45] Martin M. Cutadapt removes adapter sequences from high-throughput sequencing  
727 reads. *EMBnet. Jjournal*. 2011; 17(1): 10-12.

728 [46] Kiełbasa SM, Wan R, Sato K, Horton P, Frith MC. Adaptive seeds tame genomic  
729 sequence comparison. *Genome Res*. 2011; 21(3): 487-493.

730 [47] Ratnasingham S, Hebert PDN. BOLD: The Barcode of Life Data System  
731 ([www.barcodinglife.org](http://www.barcodinglife.org)). *Mol Ecol Notes*. 2007; 3: 355-64.

732 [48] Evans NT, Li Y, Renshaw MA, et al. Fish community assessment with eDNA  
733 metabarcoding: effects of sampling design and bioinformatic filtering. *Can J Fish Aquat  
734 Sci*. 2017; 74(9):, 1362-74.

735 [49] Zepeda-Mendoza ML, Bohmann K, Baez AC, Gilbert MTP. DAME: a toolkit for the initial  
736 processing of datasets with PCR replicates of double-tagged amplicons for DNA  
737 metabarcoding analyses. *BMC Res Notes*. 2016; 9(1): 255.

738 [50] Racimo F, Renaud G, Slatkin M. Joint estimation of contamination, error and  
739 demography for nuclear DNA from ancient humans. *PLoS Genet*. 2016; 12(4):  
740 e1005972.

741 [51] Orlando L, Gilbert MTP, Willerslev E. Reconstructing ancient genomes and  
742 epigenomes. *Nat Rev Genet* 2015; 16(7): 395

743 [52] Laurin-Lemay S, Brinkmann H, Philippe H. Origin of land plants revisited in the light of  
744 sequence contamination and missing data. *Current Biology*. 2012; 22(15): R593-4.

745 [53] Kwok S, Higuchi R. Avoiding false positives with PCR. *Nature*. 1989; 339: 237-8.

746 [54] Bush A, Sollmann R, Wilting A, et al.. Connecting Earth observation to high-throughput  
747 biodiversity data. *Nat Ecol Evol* 2017; 1(7): 0176.

748 **Table 1:** Sequence motifs that compose the 25 different target primers for the first and the  
 749 second PCR. First PCR primers consist of target specific primer followed by an overhang out  
 750 of sample specific *tag 1* and *read 1* and *read 2* sequencing primer, respectively. The second  
 751 PCR primers consist of the *read 1* or the *read 2* sequencing primer followed by an plate  
 752 specific *tag 2* and the P5 and P7 adapters, respectively (see also Fig. 2).  
 753

| Name                         | Sequence                             | Reference                             |
|------------------------------|--------------------------------------|---------------------------------------|
| tag A                        | TGCAT                                | Faircloth & and Glenn 2012            |
| tag B                        | TCAGC                                | Faircloth & and Glenn 2012            |
| tag C                        | AAGCG                                | Faircloth & and Glenn 2012            |
| tag D                        | ACAAG                                | Faircloth & and Glenn 2012            |
| tag E                        | AGTGG                                | Faircloth & and Glenn 2012            |
| tag F                        | TTGAC                                | Faircloth & and Glenn 2012            |
| tag G                        | CCTAT                                | Faircloth & and Glenn 2012            |
| tag H                        | GGATG                                | Faircloth & and Glenn 2012            |
| tag I                        | CTAGG                                | Faircloth & and Glenn 2012            |
| tag K                        | CACCT                                | Faircloth & and Glenn 2012            |
| tag L                        | GTCAA                                | Faircloth & and Glenn 2012            |
| tag M                        | GAAGT                                | Faircloth & and Glenn 2012            |
| tag N                        | CGGTT                                | Faircloth & and Glenn 2012            |
| tag O                        | ACCGA                                | Faircloth & and Glenn 2012            |
| tag P                        | ACGTC                                | Faircloth & and Glenn 2012            |
| tag Q                        | AGACT                                | Faircloth & and Glenn 2012            |
| tag R                        | AGGAA                                | Faircloth & and Glenn 2012            |
| tag S                        | ATCC                                 | Faircloth & and Glenn 2012            |
| tag T                        | CAATC                                | Faircloth & and Glenn 2012            |
| tag V                        | CATGA                                | Faircloth & and Glenn 2012            |
| tag W                        | CCACA                                | Faircloth & and Glenn 2012            |
| tag X                        | GCTTA                                | Faircloth & and Glenn 2012            |
| tag Y                        | GGTAC                                | Faircloth & and Glenn 2012            |
| tag Z                        | AACAC                                | Faircloth & and Glenn 2012            |
| Tag Control                  | ATCTG                                | Faircloth & and Glenn 2012            |
| <i>CytB</i> -fw              | AAAAAGCTTCCATCCAACATCTCAGCATGATGAAA  | Kocher et al. 1989                    |
| <i>CytB</i> -rv              | AAACTGCAGCCCCTCAGAATGATATTTGTCCTCA   | Kocher et al. 1989                    |
| <i>16S</i> -fw               | CGGTTGGGGTGACCTCGGA                  | Taylor 1996                           |
| <i>16S</i> -rv               | GCTGTTATCCCTAGGGTAACT                | Taylor 1996                           |
| <i>12S</i> -fw               | AAAAAGCTTCAAACCTGGGATTAGATACCCCACTAT | Kocher et al. 1989                    |
| <i>12S</i> -rv               | TGACTGCAGAGGGTGACGGCGGTGTGT          | Kocher et al. 1989                    |
| Read 1<br>sequence<br>primer | ACACTCTTTCCCTACACGACGCTCTTCCGATCT    | Illumina Document # 1000000002694 v03 |
| Read 2<br>sequence<br>primer | GTGACTGGAGTTCAGACGTGTGCTCTTCCGATCT   | Illumina Document # 1000000002694 v03 |
| P5 adapter                   | AATGATACGGCGACCACCGAGATCTACAC        | Illumina Document # 1000000002694 v03 |
| P7 adapter                   | CAAGCAGAAGACGGCATACGAGAT             | Illumina Document # 1000000002694 v03 |



**Table 2:** Main steps undertaken by each module of the database curation script.

| <b>MODULE</b> | <b>STEPS</b>                                                                                                                                                                                                                                                                                                                                                                                                                                                                      |
|---------------|-----------------------------------------------------------------------------------------------------------------------------------------------------------------------------------------------------------------------------------------------------------------------------------------------------------------------------------------------------------------------------------------------------------------------------------------------------------------------------------|
| Module 1      | <p>Extract subset of raw MIDORI database for query taxon and loci.</p> <p>Remove sequences with non-binomial species names, reduce subspecies to species labels</p> <p>Add local sequences (optional)</p> <p>Check for relevant new sequences for list of query species on NCBI (GenBank and RefSeq) (optional)</p> <p>Select amplicon region and remove primers</p> <p>Remove sequences with ambiguous bases</p> <p>Align</p> <p>End of module: Optional check of alignments</p> |
| Module 2      | <p>Compare sequence species labels with taxonomy</p> <p>Non-matching labels queried against Catalogue of Life to check for known synonyms</p> <p>Remaining mismatches kept if genus already exists in taxonomy, otherwise flagged for removal</p> <p>End of module: Optional check of flagged species labels</p>                                                                                                                                                                  |
| Module 3      | <p>Discard flagged sequences</p> <p>Update taxonomy key file for sequences found to be incorrectly labelled in Module 2</p> <p>Run SATIVA</p> <p>End of module: Optional check of putatively mislabelled sequences</p>                                                                                                                                                                                                                                                            |
| Module 4      | <p>Discard flagged sequences</p> <p>Finalise consensus taxonomy and relabel sequences with correct species label and accession number</p> <p>Select one representative sequence per haplotype per species</p>                                                                                                                                                                                                                                                                     |

756 **Table 3:** GNU core utilities and other lightweight tools used for manipulation of text and  
757 sequence files

| TOOL                                      | FUNCTION                               | SOURCE                                                                                          |
|-------------------------------------------|----------------------------------------|-------------------------------------------------------------------------------------------------|
| awk, cut, grep,<br>join, sed, sort,<br>tr | Processing text files                  | GNU core utilities                                                                              |
| seqbuddy                                  | Processing FASTA/Q files               | <a href="https://github.com/biologyguy/BuddySuite">https://github.com/biologyguy/BuddySuite</a> |
| seqkit                                    | Processing FASTA/Q files               | <a href="https://github.com/shenwei356/seqkit">https://github.com/shenwei356/seqkit</a>         |
| seqtk                                     | Processing FASTA/Q files               | <a href="https://github.com/lh3/seqtk">https://github.com/lh3/seqtk</a>                         |
| tabtk                                     | Processing tab-delimited<br>text files | <a href="https://github.com/lh3/tabtk">https://github.com/lh3/tabtk</a>                         |

758

15  
16  
17  
18  
19  
20  
21  
22  
23  
24  
25  
26  
27  
28  
29  
30  
31  
32  
33  
34  
35  
36  
37  
38  
39  
40  
41  
42  
43  
44  
45  
46  
47  
48  
49  
50  
51  
52  
53  
54  
55  
56  
57  
58  
59  
60  
61  
62  
63  
64  
65

759 **Table 4:** Number of reads per sequencing run and the numbers of reads with matching, chimeric or unidentifiable tags.

|                 | <b>total</b> | <b>matching</b> | <b>chimeric</b> |                      | <b>matching</b> | <b>chimeric</b> |                      | <b>erroneous</b> |                      |
|-----------------|--------------|-----------------|-----------------|----------------------|-----------------|-----------------|----------------------|------------------|----------------------|
|                 | <b>reads</b> | <b>tag 2</b>    | <b>tag 2</b>    | <b>%<sup>1</sup></b> | <b>tag 1</b>    | <b>tag 1</b>    | <b>%<sup>2</sup></b> | <b>tag 1</b>     | <b>%<sup>2</sup></b> |
|                 |              | <b>reads</b>    | <b>reads</b>    |                      | <b>reads</b>    | <b>reads</b>    |                      | <b>reads</b>     |                      |
| <b>SeqRun01</b> | 18,438,517   | 18,102,702      | 282,419         | 1.5                  | 17,514,515      | 451,028         | 2.5                  | 137,159          | 0.8                  |
| <b>SeqRun02</b> | 25,385,558   | 24,596,380      | 626,245         | 2.5                  | 23,426,084      | 612,045         | 2.5                  | 558,251          | 2.3                  |
| <b>SeqRun03</b> | 14,875,796   | 14,393,884      | 343,528         | 2.3                  | 13,766,187      | 426,181         | 3.0                  | 201,516          | 1.4                  |
| <b>SeqRun04</b> | 2,027,794    | 1,935,149       | 56,077          | 2.8                  | 1,806,655       | 88,307          | 4.6                  | 40,187           | 2.1                  |
| <b>SeqRun05</b> | 18,221,504   | 17,500,366      | 421,588         | 2.3                  | 16,793,851      | 482,365         | 2.8                  | 161,458          | 0.9                  |
| <b>SeqRun06</b> | 20,718,202   | 19,874,913      | 429,048         | 2.1                  | 19,317,305      | 371,048         | 1.9                  | 81,422           | 0.4                  |
| <b>SeqRun07</b> | 24,604,610   | 23,746,938      | 663,730         | 2.7                  | 22,446,187      | 497,366         | 2.1                  | 803,385          | 3.4                  |
| <b>Total</b>    | 124,271,981  | 120,150,332     | 2,822,635       | 2.3                  | 115,070,784     | 2,928,340       | 2.5                  | 1,983,378        | 1.7                  |
| <b>IndexRun</b> | 10,276,093   | 10,116,808      | NA              | NA                   | 5,841,190       | 4,186,688       | 41.4                 | 88,930           | 0.9                  |

<sup>1</sup> refers to total reads  
<sup>2</sup> refers to matching tag 2

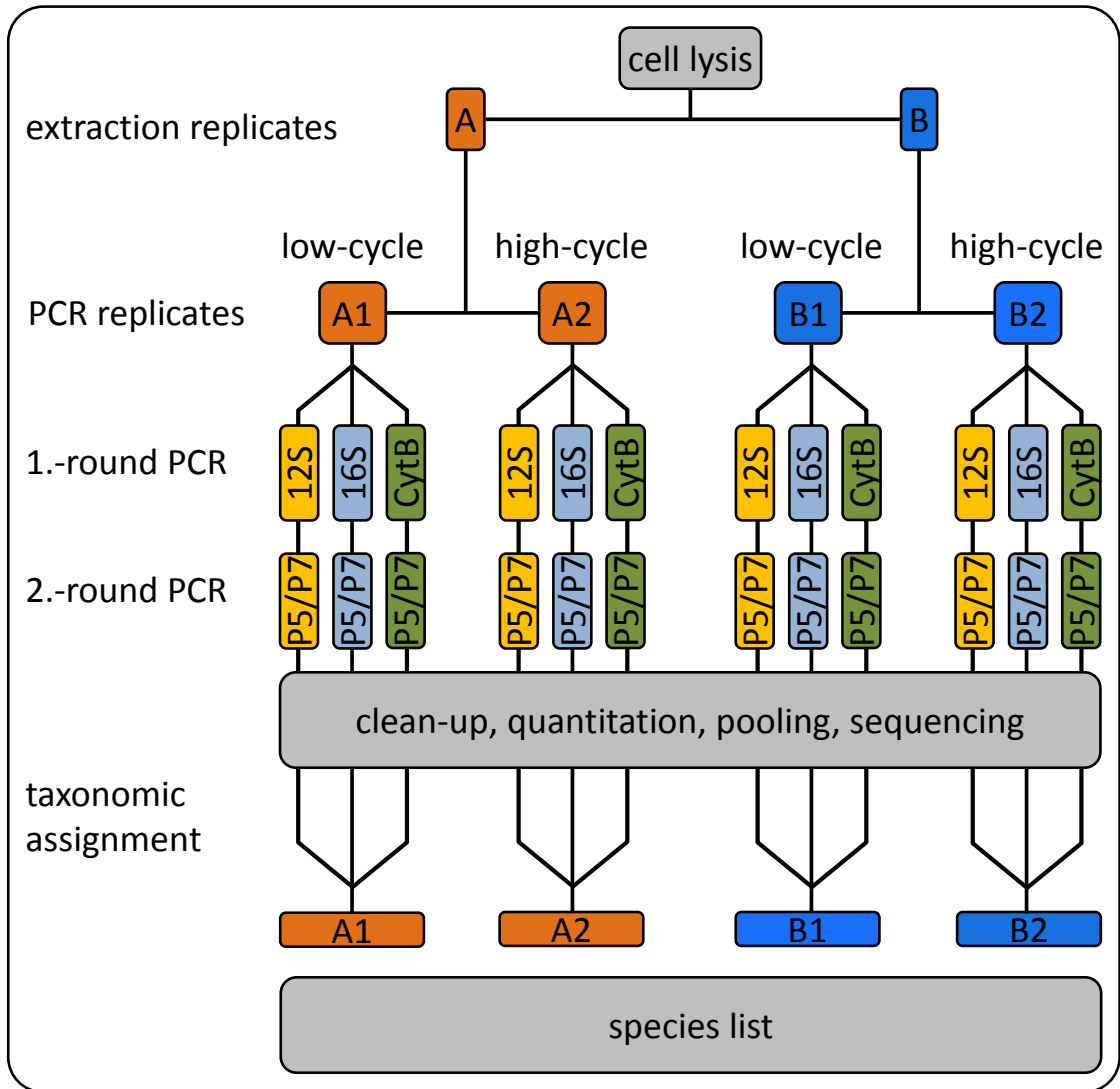

760  
761  
762  
763  
764  
765  
766

**Figure 1:** laboratory scheme; during DNA extraction the sample is split into two extraction replicates A & B. Our Protocol consists of two rounds of PCR that were the sample tags, the necessary sequencing primer and sequencing adapters are added to the the amplicons. For each extraction replicate we ran a low cycle PCR and a high cycle PCR for each marker that we have twelve independent PCR replicates per sample. All PCR products were sequenced and the obtained reads were taxonomically identified with PROTAX.

## 1.-round PCR

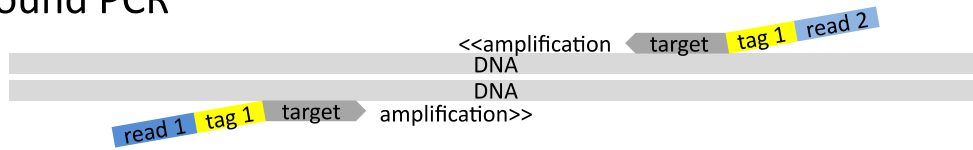

## 1.-round product:

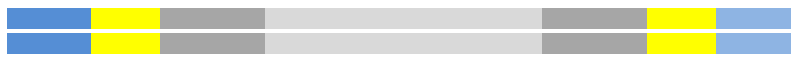

## 2.-round PCR

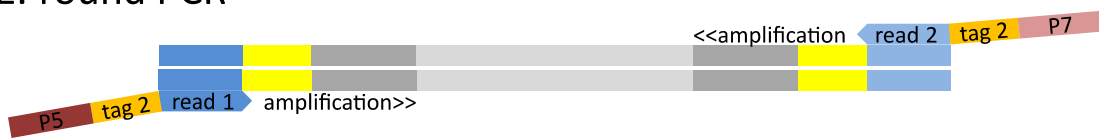

## 2.-round product:

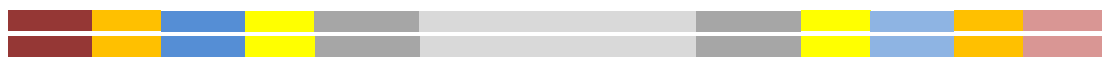

**Figure 2:** Scheme to build double 'twin-tagged' PCR libraries. The first round of PCR uses target-specific primers (12S, 16S, or CytB, dark grey) that have both been extended with the same (i.e. 'twin') sample-identifying *tag* sequences *tag 1* (yellow) and then with the different *read 1* (dark blue) and *read 2* (light blue) sequence primers. The second round of PCR uses the priming sites of the *read 1* and *read 2* sequencing primers to add twin plate-identifying *tag* sequences *tag 2* (orange) and the P5 (dark red) and P7 (light red) Illumina adapters.

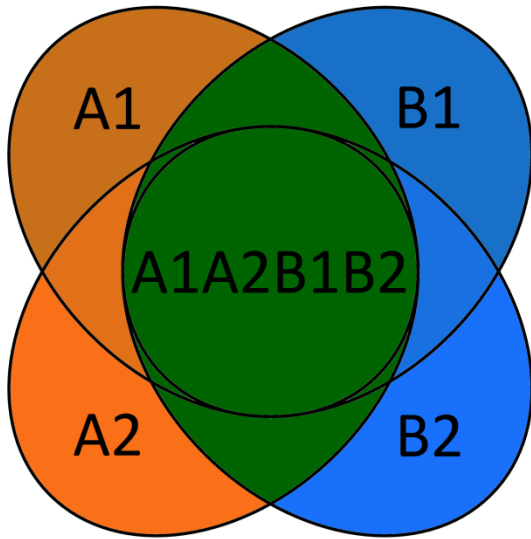

775  
776  
777

**Figure 3:** We only accepted taxonomic assignments that were positively detected in both *extraction replicates* A and B (green colour).

1  
2  
3  
4  
5  
6  
7  
8  
9  
10  
11  
12  
13  
14  
15  
16  
17  
18  
19  
20  
21  
22  
23  
24  
25  
26  
27  
28  
29  
30  
31  
32  
33  
34  
35  
36  
37  
38  
39  
40  
41  
42  
43  
44  
45  
46  
47  
48  
49  
50  
51  
52  
53  
54  
55  
56  
57  
58  
59  
60  
61  
62  
63  
64  
65

1  
2  
3  
4  
5  
6  
7  
8  
9  
10  
11  
12  
13  
14  
15  
16  
17  
18  
19  
20  
21  
22  
23  
24  
25  
26  
27  
28  
29  
30  
31  
32  
33  
34  
35  
36  
37  
38  
39  
40  
41  
42  
43  
44  
45  
46  
47  
48  
49  
50  
51  
52  
53  
54  
55  
56  
57  
58  
59  
60  
61  
62  
63  
64  
65

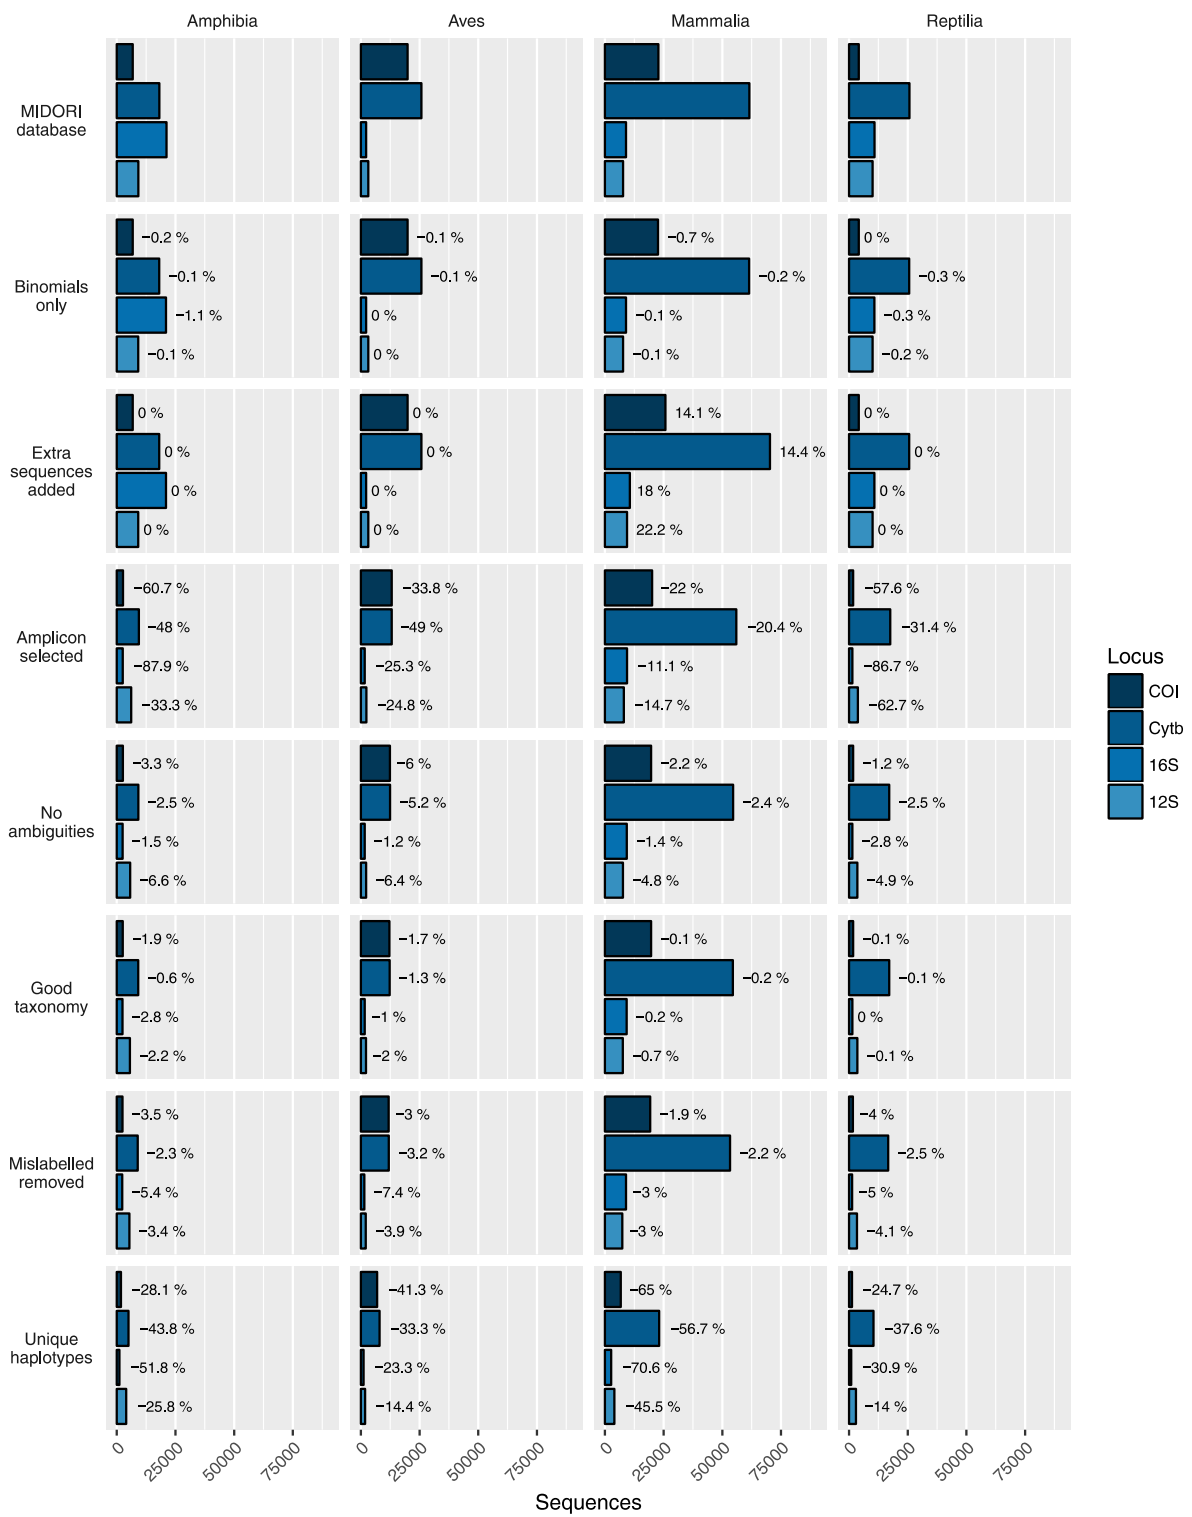

**Figure 4:** Data availability and percentage loss at each major step in the database curation procedure for each target amplicon and class of Tetrapoda. The number of sequences decreases between steps except “Extra sequences added” where additional target sequences are included for Mammalia and there is no change for the other three classes.

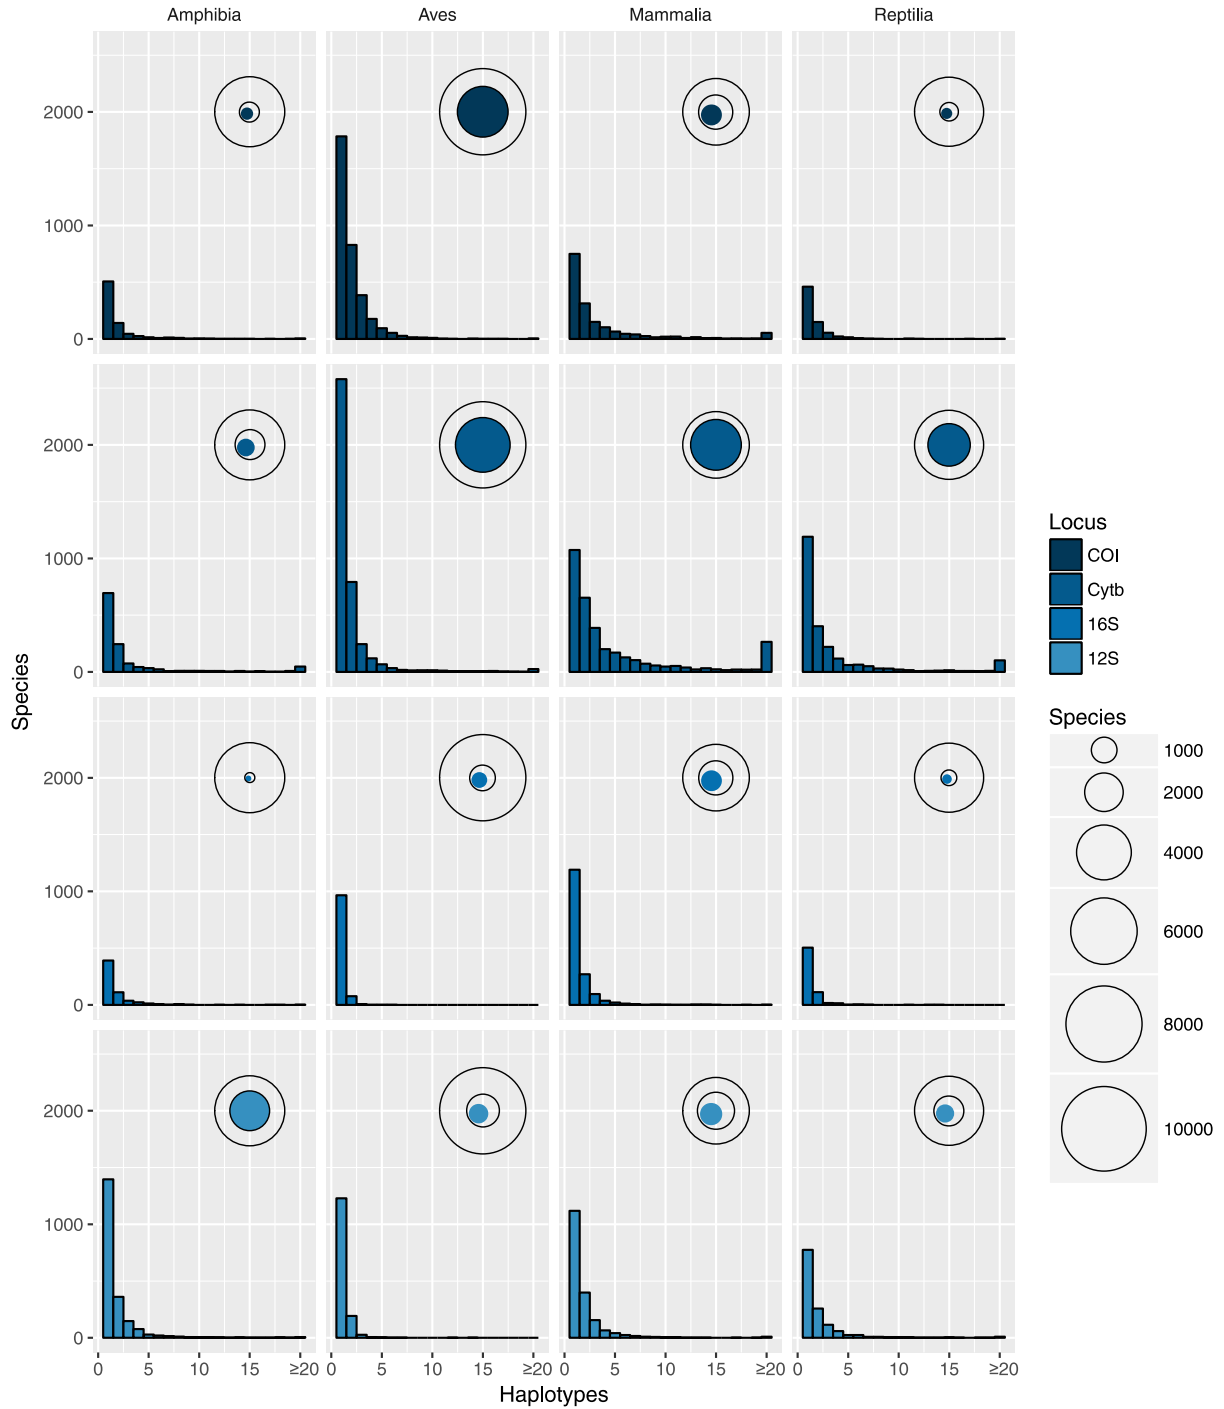

783  
784  
785  
786  
787  
788

**Figure 5:** Haplotype number by species (frequency distribution) and the total number of species with at least one haplotype, shown relative to the total number of species in the taxonomy for that category (bubbles), shown for each marker and class of Tetrapoda. The proportion of species covered by the database varies between categories but in all cases a majority of recovered species are represented by a single unique haplotype.



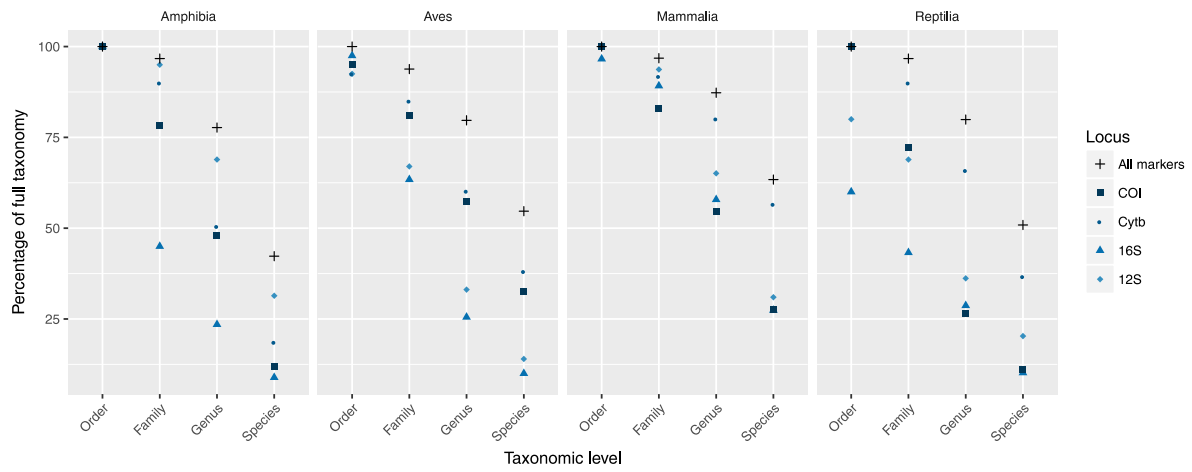

789  
 790 **Figure 6:** The percentage of the full taxonomy covered by the final database at each taxonomic level  
 791 for each class of Tetrapoda. Includes the percentage of taxa represented by each marker and all  
 792 markers combined. In all cases taking all four markers together increases the proportion of species,  
 793 genera and families covered by the database but it remains incomplete when compared with the full  
 794 taxonomy.

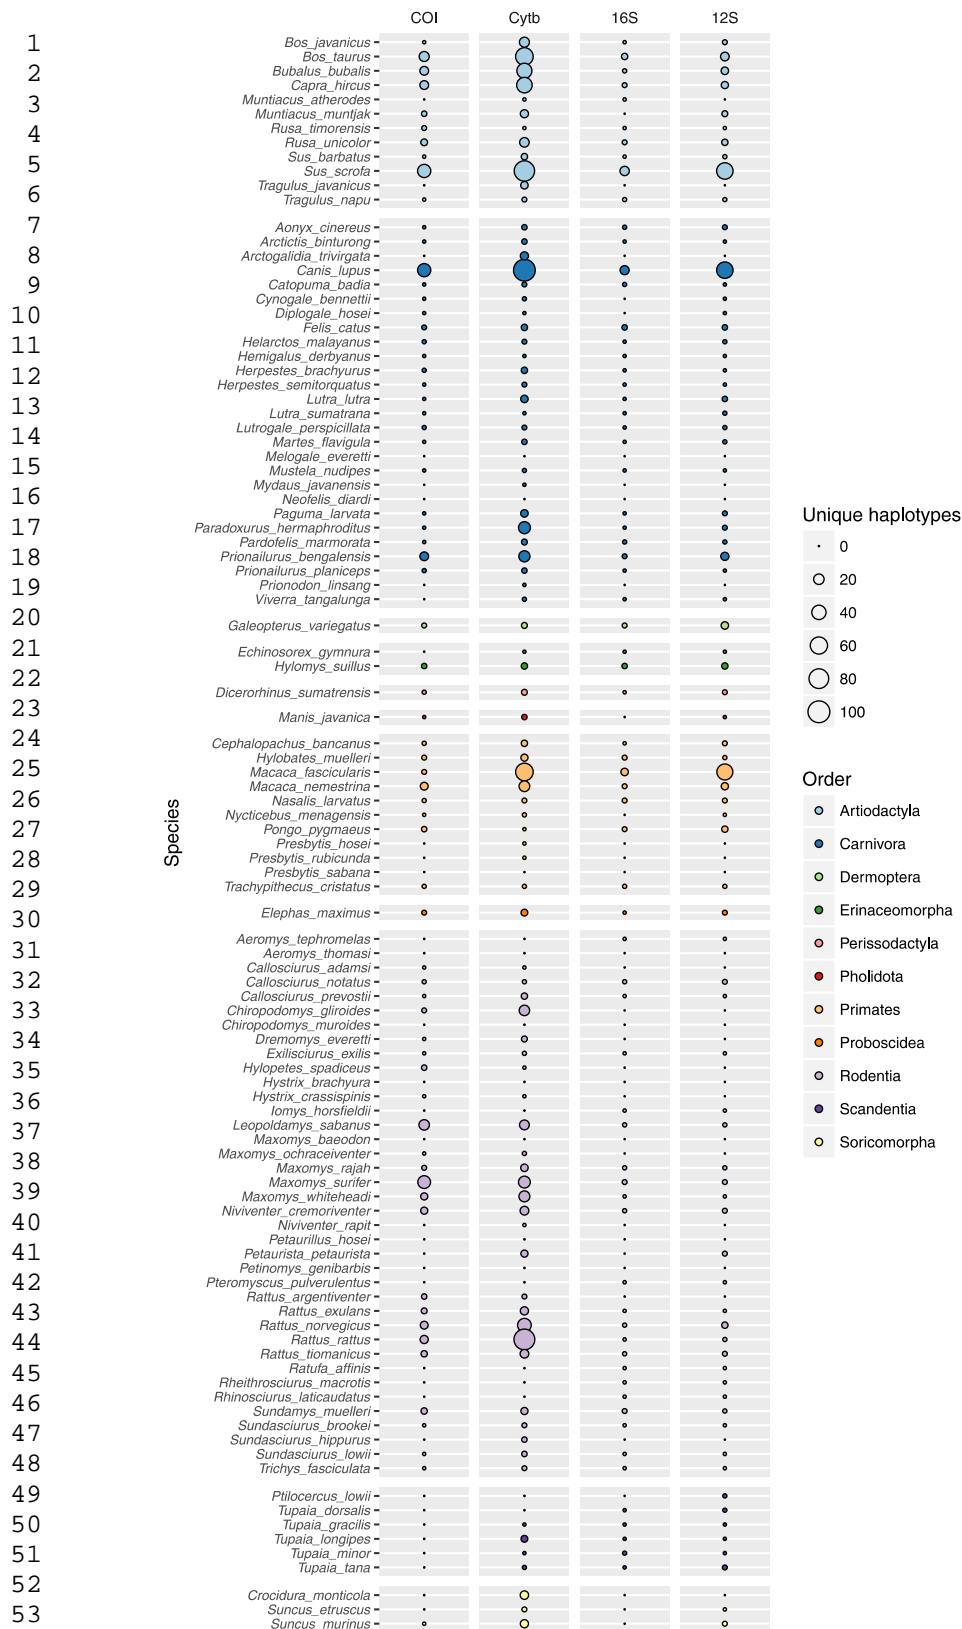

**Figure 7:** The number of unique haplotypes per marker for each of the 103 mammal species expected in the study area. Bubble size is proportional to the number of haplotypes and varies between 0 and 100. Only 554 species have at least one sequence per marker and nine species are completely unrepresented in the current database.



Click here to access/download  
**Supplementary Material**  
Supplement figure 1.pdf





Click here to access/download  
**Supplementary Material**  
Supplement table 1.pdf





Click here to access/download  
**Supplementary Material**  
Supplement table 2.pdf



Supplement: giz029_giga-d-18-00219_original_submission.pdf [file giz029_giga-d-18-00219_original_submission.pdf]
