# Supplementary material for: An efficient and robust laboratory workflow and tetrapod database for larger scale environmental DNA studies
Source: PubMed Central journal article supplement (PMC6461710; doi:10.1093/gigascience/giz029), 2019-04-13
Supplement: giz029_giga-d-18-00219_revision_2.pdf [file giz029_giga-d-18-00219_revision_2.pdf]

# GigaScience

## An efficient and robust laboratory workflow and tetrapod database for larger scale eDNA studies

--Manuscript Draft--

|                                                      |                                                                                                                                                                                                                                                                                                                                                                                                                                                                                                                                                                                                                                                                                                                                                                                                                                                                                                                                                                                                                                                                                                                                                                                                                                                                                                                                                                                                                                                                                                                                                                                                                                                                                                                                                                                                                                                                                                                                                                                                                                                                                                                                                                                                                                           |                     |
|------------------------------------------------------|-------------------------------------------------------------------------------------------------------------------------------------------------------------------------------------------------------------------------------------------------------------------------------------------------------------------------------------------------------------------------------------------------------------------------------------------------------------------------------------------------------------------------------------------------------------------------------------------------------------------------------------------------------------------------------------------------------------------------------------------------------------------------------------------------------------------------------------------------------------------------------------------------------------------------------------------------------------------------------------------------------------------------------------------------------------------------------------------------------------------------------------------------------------------------------------------------------------------------------------------------------------------------------------------------------------------------------------------------------------------------------------------------------------------------------------------------------------------------------------------------------------------------------------------------------------------------------------------------------------------------------------------------------------------------------------------------------------------------------------------------------------------------------------------------------------------------------------------------------------------------------------------------------------------------------------------------------------------------------------------------------------------------------------------------------------------------------------------------------------------------------------------------------------------------------------------------------------------------------------------|---------------------|
| <b>Manuscript Number:</b>                            | GIGA-D-18-00219R2                                                                                                                                                                                                                                                                                                                                                                                                                                                                                                                                                                                                                                                                                                                                                                                                                                                                                                                                                                                                                                                                                                                                                                                                                                                                                                                                                                                                                                                                                                                                                                                                                                                                                                                                                                                                                                                                                                                                                                                                                                                                                                                                                                                                                         |                     |
| <b>Full Title:</b>                                   | An efficient and robust laboratory workflow and tetrapod database for larger scale eDNA studies                                                                                                                                                                                                                                                                                                                                                                                                                                                                                                                                                                                                                                                                                                                                                                                                                                                                                                                                                                                                                                                                                                                                                                                                                                                                                                                                                                                                                                                                                                                                                                                                                                                                                                                                                                                                                                                                                                                                                                                                                                                                                                                                           |                     |
| <b>Article Type:</b>                                 | Technical Note                                                                                                                                                                                                                                                                                                                                                                                                                                                                                                                                                                                                                                                                                                                                                                                                                                                                                                                                                                                                                                                                                                                                                                                                                                                                                                                                                                                                                                                                                                                                                                                                                                                                                                                                                                                                                                                                                                                                                                                                                                                                                                                                                                                                                            |                     |
| <b>Funding Information:</b>                          | German Federal Ministry of Education and Research (BMBF) (01LN1301A)                                                                                                                                                                                                                                                                                                                                                                                                                                                                                                                                                                                                                                                                                                                                                                                                                                                                                                                                                                                                                                                                                                                                                                                                                                                                                                                                                                                                                                                                                                                                                                                                                                                                                                                                                                                                                                                                                                                                                                                                                                                                                                                                                                      | Dr. Andreas Wilting |
| <b>Abstract:</b>                                     | <p><b>Background</b><br/>The use of environmental DNA, 'eDNA,' for species detection via metabarcoding is growing rapidly and now, even terrestrial mammals can be monitored via 'invertebrate-derived DNA' or 'iDNA' from hematophagous invertebrates. We present a co-designed lab workflow and bioinformatic pipeline to mitigate the two most important risks of e/iDNA: sample contamination and taxonomic mis-assignment. These risks arise from the need for amplification to detect the trace amounts of DNA and the necessity of using short target regions due to DNA degradation.</p> <p><b>Findings</b><br/>Here we present a high-throughput laboratory workflow that minimises these risks via a three-step strategy: (1) each sample is sequenced for two PCR replicates from each of two extraction replicates; (2) we use a 'twin-tagging,' two-step PCR protocol; (3) and a multi-marker approach targeting three mitochondrial loci: 12S, 16S and CytB. As a test, 1532 leeches were analysed from Sabah, Malaysian Borneo. Twin-tagging allowed us to detect and exclude chimeric sequences. The smallest DNA fragment (16S) amplified best for all samples but often at lower taxonomic resolution. We only accepted assignments that were found in both extraction replicates, totalling 174 assignments for 96 samples.</p> <p>To avoid false taxonomic assignments, we also present an approach to create curated reference databases that can be used with the powerful taxonomic-assignment method PROTAX. For some taxonomic groups and some markers, curation resulted in over 50% of sequences being deleted from public reference databases, due mainly to: (1) limited overlap between our target amplicon and available reference sequences; (2) apparent mislabelling of reference sequences; (3) redundancy. A provided bioinformatics pipeline processes amplicons and conducts the PROTAX taxonomic assignment.</p> <p><b>Conclusions</b><br/>Our metabarcoding workflow should help research groups to increase the robustness of their results and therefore facilitate wider usage of e/iDNA, which is turning into a valuable source of ecological and conservation information on tetrapods.</p> |                     |
| <b>Corresponding Author:</b>                         | Jan Axtner<br>Leibniz Institute for Zoo and Wildlife Research<br>Berlin, Germany GERMANY                                                                                                                                                                                                                                                                                                                                                                                                                                                                                                                                                                                                                                                                                                                                                                                                                                                                                                                                                                                                                                                                                                                                                                                                                                                                                                                                                                                                                                                                                                                                                                                                                                                                                                                                                                                                                                                                                                                                                                                                                                                                                                                                                  |                     |
| <b>Corresponding Author Secondary Information:</b>   |                                                                                                                                                                                                                                                                                                                                                                                                                                                                                                                                                                                                                                                                                                                                                                                                                                                                                                                                                                                                                                                                                                                                                                                                                                                                                                                                                                                                                                                                                                                                                                                                                                                                                                                                                                                                                                                                                                                                                                                                                                                                                                                                                                                                                                           |                     |
| <b>Corresponding Author's Institution:</b>           | Leibniz Institute for Zoo and Wildlife Research                                                                                                                                                                                                                                                                                                                                                                                                                                                                                                                                                                                                                                                                                                                                                                                                                                                                                                                                                                                                                                                                                                                                                                                                                                                                                                                                                                                                                                                                                                                                                                                                                                                                                                                                                                                                                                                                                                                                                                                                                                                                                                                                                                                           |                     |
| <b>Corresponding Author's Secondary Institution:</b> |                                                                                                                                                                                                                                                                                                                                                                                                                                                                                                                                                                                                                                                                                                                                                                                                                                                                                                                                                                                                                                                                                                                                                                                                                                                                                                                                                                                                                                                                                                                                                                                                                                                                                                                                                                                                                                                                                                                                                                                                                                                                                                                                                                                                                                           |                     |
| <b>First Author:</b>                                 | Jan Axtner                                                                                                                                                                                                                                                                                                                                                                                                                                                                                                                                                                                                                                                                                                                                                                                                                                                                                                                                                                                                                                                                                                                                                                                                                                                                                                                                                                                                                                                                                                                                                                                                                                                                                                                                                                                                                                                                                                                                                                                                                                                                                                                                                                                                                                |                     |
| <b>First Author Secondary Information:</b>           |                                                                                                                                                                                                                                                                                                                                                                                                                                                                                                                                                                                                                                                                                                                                                                                                                                                                                                                                                                                                                                                                                                                                                                                                                                                                                                                                                                                                                                                                                                                                                                                                                                                                                                                                                                                                                                                                                                                                                                                                                                                                                                                                                                                                                                           |                     |
| <b>Order of Authors:</b>                             | Jan Axtner                                                                                                                                                                                                                                                                                                                                                                                                                                                                                                                                                                                                                                                                                                                                                                                                                                                                                                                                                                                                                                                                                                                                                                                                                                                                                                                                                                                                                                                                                                                                                                                                                                                                                                                                                                                                                                                                                                                                                                                                                                                                                                                                                                                                                                |                     |
|                                                      | Alex Crampton-Platt                                                                                                                                                                                                                                                                                                                                                                                                                                                                                                                                                                                                                                                                                                                                                                                                                                                                                                                                                                                                                                                                                                                                                                                                                                                                                                                                                                                                                                                                                                                                                                                                                                                                                                                                                                                                                                                                                                                                                                                                                                                                                                                                                                                                                       |                     |
|                                                      | Lisa Hörig                                                                                                                                                                                                                                                                                                                                                                                                                                                                                                                                                                                                                                                                                                                                                                                                                                                                                                                                                                                                                                                                                                                                                                                                                                                                                                                                                                                                                                                                                                                                                                                                                                                                                                                                                                                                                                                                                                                                                                                                                                                                                                                                                                                                                                |                     |

|                                                |                                                                                                                                                                                                                                                                                                                                                                                                                                                                                                                                                                                                                                                                                                                                                                                                                                                                                                                                                                                                                                                                                                                                                                                                                                                                                                                                                                                                                                                                                                                                                                                                                                                                                                                                                                                                                                                                                                                                                                                                                                                                                                                                                                                                                                                                                                                                                                                                                                                                                                                                                                                                                                                                                                                                                                                                                                                                                                                                                                                                                                                                                                                                                                                                                                                                                                                                                                                                                                                                                                                                                                |
|------------------------------------------------|----------------------------------------------------------------------------------------------------------------------------------------------------------------------------------------------------------------------------------------------------------------------------------------------------------------------------------------------------------------------------------------------------------------------------------------------------------------------------------------------------------------------------------------------------------------------------------------------------------------------------------------------------------------------------------------------------------------------------------------------------------------------------------------------------------------------------------------------------------------------------------------------------------------------------------------------------------------------------------------------------------------------------------------------------------------------------------------------------------------------------------------------------------------------------------------------------------------------------------------------------------------------------------------------------------------------------------------------------------------------------------------------------------------------------------------------------------------------------------------------------------------------------------------------------------------------------------------------------------------------------------------------------------------------------------------------------------------------------------------------------------------------------------------------------------------------------------------------------------------------------------------------------------------------------------------------------------------------------------------------------------------------------------------------------------------------------------------------------------------------------------------------------------------------------------------------------------------------------------------------------------------------------------------------------------------------------------------------------------------------------------------------------------------------------------------------------------------------------------------------------------------------------------------------------------------------------------------------------------------------------------------------------------------------------------------------------------------------------------------------------------------------------------------------------------------------------------------------------------------------------------------------------------------------------------------------------------------------------------------------------------------------------------------------------------------------------------------------------------------------------------------------------------------------------------------------------------------------------------------------------------------------------------------------------------------------------------------------------------------------------------------------------------------------------------------------------------------------------------------------------------------------------------------------------------------|
|                                                | Azlan Mohamed                                                                                                                                                                                                                                                                                                                                                                                                                                                                                                                                                                                                                                                                                                                                                                                                                                                                                                                                                                                                                                                                                                                                                                                                                                                                                                                                                                                                                                                                                                                                                                                                                                                                                                                                                                                                                                                                                                                                                                                                                                                                                                                                                                                                                                                                                                                                                                                                                                                                                                                                                                                                                                                                                                                                                                                                                                                                                                                                                                                                                                                                                                                                                                                                                                                                                                                                                                                                                                                                                                                                                  |
|                                                | Charles C.Y. Xu                                                                                                                                                                                                                                                                                                                                                                                                                                                                                                                                                                                                                                                                                                                                                                                                                                                                                                                                                                                                                                                                                                                                                                                                                                                                                                                                                                                                                                                                                                                                                                                                                                                                                                                                                                                                                                                                                                                                                                                                                                                                                                                                                                                                                                                                                                                                                                                                                                                                                                                                                                                                                                                                                                                                                                                                                                                                                                                                                                                                                                                                                                                                                                                                                                                                                                                                                                                                                                                                                                                                                |
|                                                | Douglas W. Yu                                                                                                                                                                                                                                                                                                                                                                                                                                                                                                                                                                                                                                                                                                                                                                                                                                                                                                                                                                                                                                                                                                                                                                                                                                                                                                                                                                                                                                                                                                                                                                                                                                                                                                                                                                                                                                                                                                                                                                                                                                                                                                                                                                                                                                                                                                                                                                                                                                                                                                                                                                                                                                                                                                                                                                                                                                                                                                                                                                                                                                                                                                                                                                                                                                                                                                                                                                                                                                                                                                                                                  |
|                                                | Andreas Wilting                                                                                                                                                                                                                                                                                                                                                                                                                                                                                                                                                                                                                                                                                                                                                                                                                                                                                                                                                                                                                                                                                                                                                                                                                                                                                                                                                                                                                                                                                                                                                                                                                                                                                                                                                                                                                                                                                                                                                                                                                                                                                                                                                                                                                                                                                                                                                                                                                                                                                                                                                                                                                                                                                                                                                                                                                                                                                                                                                                                                                                                                                                                                                                                                                                                                                                                                                                                                                                                                                                                                                |
| <b>Order of Authors Secondary Information:</b> |                                                                                                                                                                                                                                                                                                                                                                                                                                                                                                                                                                                                                                                                                                                                                                                                                                                                                                                                                                                                                                                                                                                                                                                                                                                                                                                                                                                                                                                                                                                                                                                                                                                                                                                                                                                                                                                                                                                                                                                                                                                                                                                                                                                                                                                                                                                                                                                                                                                                                                                                                                                                                                                                                                                                                                                                                                                                                                                                                                                                                                                                                                                                                                                                                                                                                                                                                                                                                                                                                                                                                                |
| <b>Response to Reviewers:</b>                  | <p>Dear Hongling Zhou,</p> <p>First we would like to thank both reviewers for their positive feedback and the editor for the potential interest to publish our paper in GigaScience. Below we provide a detailed response to the remaining comments and suggestions by the reviewers. These certainly helped to improve the manuscript further and we thank the reviewers for their valuable comments.</p> <p>On behalf of our co-authors,</p> <p>Jan Axtner &amp; Andreas Wilting</p> <p>Reviewer reports:</p> <p>Reviewer #1: Thank you for taking the time to address all comments in detail. The corrections I think have improved the clarity of the piece, and I feel convinced where you explained where I misunderstood. One possible reference to consider (given a comment about the availability of models to account for errors at multiple levels):</p> <p>Guillera-Arroita. 2017. Dealing with false-positive and false-negative errors about species occurrence at multiple levels. <i>Methods in Ecology and Evolution</i>.<br/> <a href="https://doi.org/10.1111/2041-210X.12743">https://doi.org/10.1111/2041-210X.12743</a></p> <p># Thank you for the positive feedback and the interesting article. So far we were not aware of it, but as it fit's so perfectly to our topic, thus we now refer to it in line 561</p> <p>Reviewer #2: I am overall satisfied with the responses provided by the authors. In general, it is quite unlikely nowadays that there will be a consensus for the "right/best" way forward. It is always subject to practicality/funding. If i were to conduct my own amplicon seq project, will I follow this protocol to the dots - no. However, the bioinformatics scripts and data generated will be useful for better experimental design in the future. Furthermore, even if a method is robust, lab competency / human error (mislabeling, mixing the wrong index etc) is still going to be an issue.</p> <p>-----</p> <p>Reviewer 1 raised the concern of similar tag1 being used repeatedly for multiple samples. I wonder if instead of using "Twin" tag, having a different tag1 combination (non-Twin tag?!) will be helpful (obviously for discussion). In other words, the forward and reverse primer combination in the 1st PCR round can be Tag1a for forward Tag1b for reverse. This is somewhat similar to dual indexing in Illumina but you're doing it at the initial stage and should will expand the 24 sample limitation for the tag1 based on my current understanding the twin-tag but happy to be proven wrong. With the increasing problem of index hopping particularly with the patterned flowcell for the Novaseq and Iseq (relevant to amplicon seq) , this should be useful and worth looking into.</p> <p>See <a href="https://www.biorxiv.org/content/early/2017/10/19/205799">https://www.biorxiv.org/content/early/2017/10/19/205799</a></p> <p># We agree that are other factors like lab skills or human errors that are an important issue and in fact our whole laboratory procedure is designed to minimize human-related errors. The whole workflow is designed to allow a high-throughput of samples in a maximum standardized way, i.e. sample aliquots are arranged already in eight-well stripes for the use of eight-channel pipets in order to minimize the risk of pipetting the wrong sample into the wrong well between the different replicates. That is also one of the reasons why we do not start mixing the tag1 combinations and re-use the 24 tags</p> |

for each PCR plate. Our forward and reverse primers are already pre-mixed in an eight-well stripe and we use the same pipetting scheme with an eight-channel pipet for every 96-well PCR plate. If we would start using different tag combinations for each PCR plate we would have a much higher risk of pipetting errors mixing the wrong indices (handling 48 tubes is much more error prone than handling just three 8-well stripes).

In addition to this rather practical lab-work related reason we highlighted (Line: 602 to 605) that it is still very unlikely that the repeated use of tags for multiple samples causes accepted false positives in the end, as the final acceptance is not based on single occurrence but on repeated occurrence in independent replicates. We fully agree that the use of non-matching tags (e.g. A/B) would increase the number of samples that could be analysed in one sequencing run. But at the same time it would make it much harder to identify contaminations or tag jumps as we discuss in line 575 to 599. Contaminations of a PCR with another differently labelled PCR product would increase the number of chimeras in your PCR which would remain undetected if you would also use non-matching tag combination. The same holds true for tag-jumps, which are an issue in Illumina sequencing (see Schnell et al. 2015) and where we could demonstrate that our PCR libraries reduce the read-losses compared to adapter-ligation techniques (lines 585-594). Particular for the last reasons we favoured to use only twin-tag combinations.

# We also thank the reviewer for the interesting paper, which also used quadruple-indexed libraries. We do however not see the application of RAD sequencing to identify invertebrate-derived DNA of unknown origin. Generally RAD sequencing requires high molecular weight genomic DNA. Our samples have a mixed pools of genomic and mitochondrial DNA from different organisms and our target DNA is often highly degraded, of poor quality and of low quantities. In addition we have the presence of high amounts of leech DNA. Therefore we currently do not see an application of this sequencing method.

"Also the read losses due to trimming and quality filtering were significantly lower for the 16S sequencing runs (1.3% and 5.3% in average, Supplemental Table 3) compared to the sequencing runs for the longer fragments of 12S and CytB (65.3% and 44.3% in average, Supplemental Table 3)."

The Usearch read overlapping pipeline is sensitive to number of mismatches in alignment. The Read2 in MiSeq 600 cycles run is particularly notoriously for being low quality towards the end of the run. Try trimming both R1 and R2 to 250 bp (length trimming) and redo the overlap and read loss calculation.

# Thank you, for this valuable advice. We tested it for one of our 12S runs and compared results. As you suggested we trimmed the reads to 250 base pairs adjusted the -fastq\_minovlen parameter for usearch from 50bp to just 25bp as we would expect to have a smaller overlap of the trimmed reads. In fact we obtained more read after merging (13,129,505 vs. 13,388,933). However, most of those reads were lost again after filtering so that our original settings produced in fact the most reads in the end (4,694,624 vs. 4,227,346). Thus we think it is reasonable to stick to the current settings in the pipeline.

Results original pipeline:

raw reads:13,766,169

merging: 13,129,505

clipping:6,498,738

filtering:4,694,624

Trimmed reads (trimm 250bp, overlap 25bp):

raw reads:13,766,169

merging:13,388,933

clipping:6,684,766

filtering:4,227,346

"All three markers were amplified simultaneously for each batch of samples in a single

|                                                                                                                                                                                                                                                                                                                                                                                                                                                                              |                                                                                                                                                                                                                                                                                                                                                                                                                                                                                                                                                                                                                                                                                                                                                                                                                                                                                                                                                                                                                                                                                                                                                        |
|------------------------------------------------------------------------------------------------------------------------------------------------------------------------------------------------------------------------------------------------------------------------------------------------------------------------------------------------------------------------------------------------------------------------------------------------------------------------------|--------------------------------------------------------------------------------------------------------------------------------------------------------------------------------------------------------------------------------------------------------------------------------------------------------------------------------------------------------------------------------------------------------------------------------------------------------------------------------------------------------------------------------------------------------------------------------------------------------------------------------------------------------------------------------------------------------------------------------------------------------------------------------------------------------------------------------------------------------------------------------------------------------------------------------------------------------------------------------------------------------------------------------------------------------------------------------------------------------------------------------------------------------|
|                                                                                                                                                                                                                                                                                                                                                                                                                                                                              | <p>PCR plate".</p> <p>In different individual well?<br/> # Sorry for the misunderstanding, we did not do multiplex-PCR and amplified in individual wells. We added this to the sentence in lines 324-325:<br/> "... All three markers were amplified simultaneously in individual wells for each batch of samples in a single PCR plate. ..."</p> <p>Because of different amplicon lengths and therefore different binding affinities to the flow cell<br/> Also due to clustering efficiency . smaller fragment = easier to amplify<br/> # We agree, also due to DNA degradation we had higher amplification success for the shortest fragment (see lines 562 – 566). As we say in lines 337-340 "...Because of different amplicon lengths and therefore different binding affinities to the flow cell, 12S and CytB products were combined in a single library, whereas positive 16S products were always combined in a separate library. ..."</p> <p>and these libraries were sequenced independently. To make this clearer we added a second sentence (line 340): "... 12S/CytB libraries were sequenced independently from 16S libraries...."</p> |
| <b>Additional Information:</b>                                                                                                                                                                                                                                                                                                                                                                                                                                               |                                                                                                                                                                                                                                                                                                                                                                                                                                                                                                                                                                                                                                                                                                                                                                                                                                                                                                                                                                                                                                                                                                                                                        |
| <b>Question</b>                                                                                                                                                                                                                                                                                                                                                                                                                                                              | <b>Response</b>                                                                                                                                                                                                                                                                                                                                                                                                                                                                                                                                                                                                                                                                                                                                                                                                                                                                                                                                                                                                                                                                                                                                        |
| Are you submitting this manuscript to a special series or article collection?                                                                                                                                                                                                                                                                                                                                                                                                | No                                                                                                                                                                                                                                                                                                                                                                                                                                                                                                                                                                                                                                                                                                                                                                                                                                                                                                                                                                                                                                                                                                                                                     |
| <b>Experimental design and statistics</b>                                                                                                                                                                                                                                                                                                                                                                                                                                    | Yes                                                                                                                                                                                                                                                                                                                                                                                                                                                                                                                                                                                                                                                                                                                                                                                                                                                                                                                                                                                                                                                                                                                                                    |
| <p>Full details of the experimental design and statistical methods used should be given in the Methods section, as detailed in our <a href="#">Minimum Standards Reporting Checklist</a>. Information essential to interpreting the data presented should be made available in the figure legends.</p> <p>Have you included all the information requested in your manuscript?</p>                                                                                            |                                                                                                                                                                                                                                                                                                                                                                                                                                                                                                                                                                                                                                                                                                                                                                                                                                                                                                                                                                                                                                                                                                                                                        |
| <b>Resources</b>                                                                                                                                                                                                                                                                                                                                                                                                                                                             | Yes                                                                                                                                                                                                                                                                                                                                                                                                                                                                                                                                                                                                                                                                                                                                                                                                                                                                                                                                                                                                                                                                                                                                                    |
| <p>A description of all resources used, including antibodies, cell lines, animals and software tools, with enough information to allow them to be uniquely identified, should be included in the Methods section. Authors are strongly encouraged to cite <a href="#">Research Resource Identifiers</a> (RRIDs) for antibodies, model organisms and tools, where possible.</p> <p>Have you included the information requested as detailed in our <a href="#">Minimum</a></p> |                                                                                                                                                                                                                                                                                                                                                                                                                                                                                                                                                                                                                                                                                                                                                                                                                                                                                                                                                                                                                                                                                                                                                        |

|                                                                                                                                                                                                                                                                                                                                                                                                                                                                                                                                                         |     |
|---------------------------------------------------------------------------------------------------------------------------------------------------------------------------------------------------------------------------------------------------------------------------------------------------------------------------------------------------------------------------------------------------------------------------------------------------------------------------------------------------------------------------------------------------------|-----|
| <a href="#">Standards Reporting Checklist?</a>                                                                                                                                                                                                                                                                                                                                                                                                                                                                                                          |     |
| <p><b>Availability of data and materials</b></p> <p>All datasets and code on which the conclusions of the paper rely must be either included in your submission or deposited in <a href="#">publicly available repositories</a> (where available and ethically appropriate), referencing such data using a unique identifier in the references and in the “Availability of Data and Materials” section of your manuscript.</p> <p>Have you have met the above requirement as detailed in our <a href="#">Minimum Standards Reporting Checklist?</a></p> | Yes |

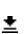

[Click here to view linked References](#)

1 An efficient and robust laboratory workflow and tetrapod database  
2 for larger scale eDNA studies

3  
4  
5  
6  
7 Jan Axtner<sup>1+</sup>, Alex Crampton-Platt<sup>1</sup>, Lisa A. Hörig<sup>1</sup>, Azlan Mohamed<sup>1</sup>, Charles C.Y. Xu<sup>2,3,4</sup>,  
8 Douglas W. Yu<sup>2,5</sup> and Andreas Wilting<sup>1</sup>  
9

10  
11  
12 **Affiliations:**

13 <sup>1</sup> Leibniz Institute for Zoo and Wildlife Research (*Leibniz-IZW*), Alfred-Kowalke-Str. 17,  
14 10315 Berlin, Germany

15  
16 <sup>2</sup> State Key Laboratory of Genetic Resources and Evolution, Kunming Institute of Zoology,  
17 Chinese Academy of Sciences, 32 Jiaochang East Road, Kunming, Yunnan 650223, China

18  
19 <sup>3</sup> Groningen Institute for Evolutionary Life Sciences, University of Groningen, P.O. Box  
20 11103, 9700 CC Groningen, The Netherlands

21 <sup>4</sup> Redpath Museum and Department of Biology, McGill University, Montreal, QC, Canada

22 <sup>5</sup> School of Biological Sciences, University of East Anglia, Norwich Research Park, Norwich,  
23 Norfolk NR47TJ, UK  
24

25 + corresponding author  
26

27  
28 **email addresses:**

29 Jan Axtner: [axtner@izw-berlin.de](mailto:axtner@izw-berlin.de), ORCID: 0000-0003-1269-5586

30 Alex Crampton-Platt: [alex@naturemetrics.co.uk](mailto:alex@naturemetrics.co.uk)

31 Lisa A. Hörig: [lisa.hoerig@arcor.de](mailto:lisa.hoerig@arcor.de)

32 Azlan Mohamed: [mohamed@izw-berlin.de](mailto:mohamed@izw-berlin.de), ORCID: 0000-0003-3788-4383

33 Charles C.Y. Xu: [charles.cong.xu@gmail.com](mailto:charles.cong.xu@gmail.com), ORCID: 0000-0001-6779-8879

34 Douglas W. Yu: [dougwyu@mac.com](mailto:dougwyu@mac.com)

35 Andreas Wilting: [wilting@izw-berlin.de](mailto:wilting@izw-berlin.de), ORCID: 0000-0001-5073-9186  
36  
37  
38  
39

40 **Keywords:**

41 metabarcoding, iDNA, eDNA, leeches  
42  
43  
44  
45  
46  
47  
48  
49  
50  
51  
52  
53  
54  
55  
56  
57  
58  
59  
60  
61  
62  
63  
64  
65

31 **Abstract**

32 **Background**

33 The use of environmental DNA, 'eDNA,' for species detection via metabarcoding is growing  
34 rapidly. We present a co-designed lab workflow and bioinformatic pipeline to mitigate the  
35 two most important risks of eDNA: sample contamination and taxonomic mis-assignment.  
36 These risks arise from the need for PCR amplification to detect the trace amounts of DNA  
37 combined with the necessity of using short target regions due to DNA degradation.

38 **Findings**

39 Our high-throughput workflow minimises these risks via a four-step strategy: (1) technical  
40 replication with two *PCR replicates* and two *extraction replicates*; (2) using multi-markers  
41 (*12S*, *16S*, *CytB*); (3) a 'twin-tagging,' two-step PCR protocol;(4) use of the probabilistic  
42 taxonomic assignment method *PROTAX*, which can account for incomplete reference  
43 databases.

44 As annotation errors in the reference sequences can result in taxonomic mis-assignment, we  
45 supply a protocol for curating sequence datasets. For some taxonomic groups and some  
46 markers, curation resulted in over 50% of sequences being deleted from public reference  
47 databases, due to (1) limited overlap between our target amplicon and reference  
48 sequences; (2) mislabelling of reference sequences; (3) redundancy.

49 Finally, we provide a bioinformatic pipeline to process amplicons and conduct *PROTAX*  
50 assignment and tested it on an 'invertebrate derived DNA' (iDNA) dataset from 1532  
51 leeches from Sabah, Malaysia. Twin-tagging allowed us to detect and exclude sequences  
52 with non-matching tags. The smallest DNA fragment (*16S*) amplified most frequently for all  
53 samples, but was less powerful for discriminating at species rank. Using a stringent and lax  
54 acceptance criteria we found 162 (stringent) and 190 (lax) vertebrate detections of 95  
55 (stringent) and 109 (lax) leech samples.

56 **Conclusions**

57 Our metabarcoding workflow should help research groups increase the robustness of their  
58 results and therefore facilitate wider usage of e/iDNA, which is turning into a valuable  
59 source of ecological and conservation information on tetrapods.

## 60 Introduction

1  
2 61 Monitoring, or even detecting, elusive or cryptic species in the wild can be challenging. In  
3 62 recent years there has been a rise in the availability of cost-effective DNA-based methods  
4 63 made possible by advances in high-throughput DNA sequencing (HTS). One such method is  
5 64 eDNA metabarcoding, which seeks to identify the species present in a habitat from traces of  
6 65 'environmental DNA' (eDNA) in substrates such as water, soil, or faeces. A variant of eDNA  
7 66 metabarcoding, known as 'invertebrate-derived DNA' (iDNA) metabarcoding, targets the  
8 67 genetic material of prey or host species extracted from copro-, sarco- or haematophagous  
9 68 invertebrates. Examples include tick [1] s, blow or carrion flies [2; 3; 4; 5], mosquitoes [6; 7;  
10 69 8; 9] and leeches [10; 11; 12; 13]. Many of these parasites are ubiquitous, highly abundant,  
11 70 and easy to collect, making them an ideal source of biodiversity data, especially for  
12 71 terrestrial vertebrates that are otherwise difficult to detect [10; 14; 15]. In particular, the  
13 72 possibility for bulk collection and sequencing in order to screen large areas and minimise  
14 73 costs is attractive. However, most of the recent studies on iDNA studies focus on single-  
15 74 specimen DNA extracts and Sanger sequencing and thus are not making use of the advances  
16 75 of HTS and a metabarcoding framework for carrying out larger scale biodiversity surveys.

17 76 That said, e/iDNA metabarcoding also poses several challenges, due to the low quality and  
18 77 low amounts of target DNA available, relative to non-target DNA (including the high-quality  
19 78 DNA of the live-collected, invertebrate vector). In bulk iDNA samples comprised of many  
20 79 invertebrate specimens, this problem is further exacerbated by the variable time since each  
21 80 individual has fed, if at all, leading to differences in the relative amounts and degradation of  
22 81 target DNA per specimen. This makes e/iDNA studies similar to ancient DNA samples, which  
23 82 also pose the problem of low quality and low amounts of target DNA [16; 17]. The great  
24 83 disparity in the ratio of target to non-target DNA and the low overall amount of the former  
25 84 requires an enrichment step, which is achieved via the amplification of a short target  
26 85 sequence (amplicon) by polymerase chain reaction (PCR) to obtain enough target material  
27 86 for sequencing. However, this enrichment step can result in false positive species  
28 87 detections, either through sample cross-contamination or through volatile short PCR  
29 88 amplicons in the laboratory, and in false-negative results, through primer bias and low  
30 89 concentrations of template DNA. Although laboratory standards to prevent and control for  
31 90 such false results are well established in the field of ancient DNA, there are still no best-  
32 91 practice guidelines for e/iDNA studies, and thus few studies sufficiently account for such  
33 92 problems [18].

34 93 The problem is exacerbated by the use of 'universal' primers used for the PCR, which  
35 94 maximise the taxonomic diversity of the amplified sequences. This makes the method a  
36 95 powerful biodiversity assessment tool, even where little is known *a priori* about which  
37 96 species might be found. However, using such primers, in combination with low quality and  
38 97 quantity of target DNA, which often requires a high number of PCR cycles to generate  
39 98 enough amplicon products for sequencing, makes metabarcoding studies particularly  
40 99 vulnerable to false results [13; 19; 20]. The high number of PCR cycles, combined with the



100 high sequencing depth of HTS, also increase the likelihood that contaminants are amplified  
101 and detected, possibly to the same or greater extent as some true-positive trace DNA. As  
102 e/iDNA have been proposed as tools to detect very rare and priority conservation species  
103 such as the Saola, *Pseudoryx nghetinhensis* [10], false detection might result in misdirected  
104 conservation activities worth several hundreds of thousands of US dollars like for the ivory-  
105 billed woodpecker where most likely false evidence of the bird's existence have been  
106 overemphasized to shore up political and financial support for saving it [21]. Therefore,  
107 similar to ancient DNA studies, great care must be taken to minimise the possibility for  
108 cross-contamination in the laboratory and to maximise the correct detection of species  
109 through proper experimental and analytical design. Replication in particular is an important  
110 tool for reducing the incidence of false negatives and detection of false positives but the  
111 trade-off is increased cost, workload, and analytical complexity [19].

112 An important source of false positive species detections is the incorrect assignment of  
113 taxonomies to the millions of short HTS reads generated by metabarcoding. Although there  
114 has been a proliferation of tools focused on this step, most can be categorised into just  
115 three groups depending on whether the algorithm utilises sequence similarity searches,  
116 sequence composition models, or phylogenetic methods [22; 23; 24]. The one commonality  
117 among all methods is the need for a reliable reference database of correctly identified  
118 sequences, yet there are few curated databases currently appropriate for use in e/iDNA  
119 metabarcoding. Two exceptions are SILVA [25] for the nuclear markers SSU and LSU rRNA  
120 used in microbial ecology, and BOLD (Barcode of Life Database; citation) for the COI 'DNA  
121 barcode' region. For other loci, a non-curated database downloaded from the INSDC  
122 (International Nucleotide Sequence Database Collaboration, e.g. GenBank) is generally used.  
123 However, the INSDC places the burden for metadata accuracy, including taxonomy, on the  
124 sequence submitters, with no restriction on sequence quality or veracity. For instance,  
125 specimen identification is often carried out by non-specialists, which increases error rates,  
126 and common laboratory contaminant species (e.g. human DNA sequences) are sometimes  
127 submitted in lieu of the sample itself. The rate of sequence mislabelling in fungi has been  
128 assessed for GenBank where it was up to 20% [26] and it is an issue that is often neglected  
129 [27; 28]. For several curated microbial databases (Greengenes, LTP, RDP, SILVA),  
130 mislabelling rates have been estimated at between 0.2% and 2.5% [29]. Given the lack of  
131 professional curation it is likely that the true proportion of mislabelled samples in GenBank  
132 is somewhere between these numbers. Moreover, correctly identifying such errors is  
133 labour-intensive, so most metabarcoding studies simply base their taxonomic assignments  
134 on sequence-similarity searches of the whole INSDC database (e.g. with BLAST) [3; 10; 12]  
135 and thus can only detect errors if assignments are ecologically unlikely. Furthermore,  
136 reference sequences for the species that are likely to be sampled in e/iDNA studies are  
137 often underrepresented in or absent from these databases, which increases the possibility  
138 of incorrect assignment. For instance, fewer than 50% of species occurring in a tropical  
139 megadiverse rainforest are represented in Genbank (see findings below). When species-  
140 level matches are ambiguous, it might still be possible to assign a sequence to a higher

141 taxonomic rank by using an appropriate algorithm such as Metagenome Analyzer's  
142 (MEGAN) Lowest Common Ancestor [30] or *PROTAX* [31].

143 We present here a complete laboratory workflow and complementary bioinformatics  
144 pipeline, starting from DNA extraction to taxonomic assignment of HTS reads using a  
145 curated reference database. The laboratory workflow allows for efficient screening of  
146 hundreds of e/iDNA samples. The workflow includes (1) two *extraction replicates* are  
147 separated during DNA extraction, and each is sequenced in two *PCR replicates* (Fig. 1); (2)  
148 robustness of taxonomic assignment is improved by using up to three mitochondrial  
149 markers; (3) a 'twin-tagged', two-step PCR protocol prevents cross-sample contamination as  
150 no unlabelled PCR products are produced (Fig. 2) while also allowing for hundreds of PCR  
151 products to be pooled before costly Illumina library preparation; (4) our bioinformatics  
152 pipeline includes a standardized, automated, and replicable protocol to create a curated  
153 database, which allows updating as new reference sequences become available, and to be  
154 expanded to other amplicons. We provide scripts for processing raw sequence data to  
155 quality-controlled dereplicated reads and for taxonomic assignment of these reads using  
156 *PROTAX* [31], a probabilistic method that has been shown to be robust even when reference  
157 databases are incomplete [23; 4] (all scripts are available from URL  
158 <https://github.com/alexcrampton-platt/screenforbio-mbc>).

## 159 **Methods**

160 Establishment of the tetrapod reference database

### 161 *Reference database*

162 A custom bash script was written to generate a tetrapod reference database for up to four  
163 mitochondrial markers – a short 93 bp fragment of *16S* rRNA (*16S*), a 389 bp fragment of  
164 *12S* rRNA (*12S*), a 302 bp fragment of cytochrome b (*CytB*), and a 250 bp mitochondrial  
165 cytochrome c oxidase subunit I amplicon (*COI*) that has previously been used in iDNA studies  
166 [2]. An important time-saving step was the use of the FASTA-formatted Midori  
167 mitochondrial database [32], which is a lightly curated subset of Genbank. Our script  
168 updated the FASTA files with a subset of target species, removed errors and redundancy,  
169 trimmed the sequences to include only the amplicon regions, and output FASTA files with  
170 species names and GenBank accessions in the headers.

171 The script accepts four data inputs, two of which are optional. The required inputs are: (i)  
172 the Midori sequences (December 2015 'UNIQUE', downloaded from [http://www.reference-  
173 midori.info/download.php#](http://www.reference-midori.info/download.php#)) for the relevant genes and (ii) an initial reference taxonomy of  
174 tetrapods. This taxonomy is needed to find or generate a full taxonomic classification for  
175 each sequence because the taxonomies in Midori are from Genbank and thus include  
176 incorrect, synonymized, or incomplete taxonomies. Here we used the Integrated Taxonomic  
177 Information System (ITIS) classification for Tetrapoda, obtained with the R package *taxize*  
178 version 0.9.0 ([33], functions *downstream* and *classification*). The optional inputs are: (iii)  
179 supplementary FASTA files of reference sequences that should be added to the database,

180 and (iv) a list of target species to be queried on GenBank to capture any sequences  
181 published since the December 2015 Midori dataset was generated.

182 For this study, 72 recently published [34] and 7 unpublished partial mitochondrial mammal  
183 genomes (Accession Numbers MH464789, MH464790, MH464791, MH464792, MH464793,  
184 MH464794, MH464795, MH464796, MH464797, MH464798, MH464799, MH464800,  
185 MH464801) were added as input (iii). A list of 103 mammal species known to be present in  
186 the sampling area plus *Homo sapiens* and our positive control *Myodes glareolus* was added  
187 as input (iv).

188 With the above inputs, the seven curation steps are: 1) remove sequences not identified to  
189 species; 2) add extra sequences from optional inputs (iii) and (iv) above; 3) trim the  
190 sequences to leave only the target amplicon; 4) remove sequences with ambiguities; 5)  
191 compare species names from the Midori dataset to the reference taxonomy from input (ii)  
192 and replace with a consensus taxonomy; 6) identify and remove putatively mislabelled  
193 sequences; 7) dereplicate sequences, retaining one haplotype per species.

194 The script is split into four modules, allowing optional manual curation at three key steps.  
195 The steps covered by each of the four modules are summarized in Table 2. The main  
196 programs used are highlighted and cited in the text where relevant, but many intermediate  
197 steps used common UNIX tools and unpublished lightweight utilities freely available from  
198 GitHub (Table 3).

199 **Module 1** - The first step is to select the tetrapod sequences from the Midori database for  
200 each of the four selected loci (input (i) above). This, and the subsequent step to discard  
201 sequences without strict binomial species names and reduce subspecies identifications to  
202 species-level, are made possible by the inclusion of the full NCBI taxonomic classification of  
203 each sequence in the FASTA header by the Midori pipeline. The headers of the retained  
204 sequences are then reformatted to include just the species name and GenBank accession  
205 separated by underscores. If desired, additional sequences from local FASTA files are now  
206 added to the Midori set (input (iii)). The headers of these FASTA files are required to be in  
207 the same format. Next, optional queries are made to the NCBI GenBank and RefSeq  
208 databases for each species in a provided list (input (iv)) for each of the four target loci, using  
209 NCBI's Entrez Direct [35]. Matching sequences are downloaded in FASTA format, sequences  
210 prefixed as "UNVERIFIED" are discarded, the headers are simplified as previously, and those  
211 sequences not already in the Midori set are added. Trimming each sequence down to the  
212 relevant target marker was carried out in a two-step process in which *usearch* (*-search\_pcr*)  
213 was used to select sequences where both primers were present, and these were in turn  
214 used as a reference dataset for *blastn* to select partially matching sequences from the rest  
215 of the dataset [36; 37]. Sequences with a hit length of at least 90% of the expected marker  
216 length were retained by extracting the relevant subsequence based on the BLAST hit co-  
217 ordinates. Sequences with ambiguous bases were discarded at this stage. In the final step in  
218 module 1, a multiple-sequence alignment was generated with MAFFT (MAFFT,  
219 RRID:SCR\_011811) [38; 39] for each partially curated amplicon dataset (for the SATIVA step

220 below). The script then breaks to allow the user to check for any obviously problematic  
221 sequences that should be discarded before continuing.

222 *Module 2* - The species labels of the edited alignments are compared with the reference  
223 taxonomy (input (ii)). Any species not found is queried against the Catalogue of Life  
224 database (CoL) via *taxize* in case these are known synonyms, and the correct species label  
225 and classification is added to the reference taxonomy. The original species label is retained  
226 as a key to facilitate sequence renaming, and a note is added to indicate its status as a  
227 synonym. Finally, the genus name of any species not found in the CoL is searched against  
228 the consensus taxonomy, and if found, the novel species is added by taking the higher  
229 classification levels from one of the other species in the genus. Orphan species labels are  
230 printed to a text file, and the script breaks to allow the user to check this list and manually  
231 create classifications for some or all if appropriate.

232 *Module 3* - This module begins by checking for any manually generated classification files  
233 (from the end of Module 2) and merging them with the reference taxonomy from Module 2.  
234 Any remaining sequences with unverifiable classifications are removed at this step. The next  
235 steps convert the sequences and taxonomy file to the correct formats for SATIVA [29],  
236 which detects possibly mislabelled sequences by generating a maximum likelihood  
237 phylogeny from the alignment in Module 1 and comparing each sequence's taxonomy  
238 against its phylogenetic neighbors. Sequence headers in the edited MAFFT alignments are  
239 reformatted to include only the GenBank accession, and a taxonomy key file is generated  
240 with the correct classification listed for each accession number. In cases where the original  
241 species label is found to be a synonym, the corrected label is used. Putatively mislabelled  
242 sequences in each amplicon are then detected with SATIVA, and the script breaks to allow  
243 inspection of the results. The user may choose to make appropriate edits to the taxonomy  
244 key file or list of putative mislabels at this point.

245 *Module 4* - Any sequences that are still flagged as mislabelled at the start of the fourth  
246 module are deleted from the SATIVA input alignments, and all remaining sequences are  
247 relabelled with the correct species name and accession. A final consensus taxonomy file is  
248 generated in the format required by *PROTAX*. Alignments are subsequently unaligned prior  
249 to species-by-species selection of a single representative per unique haplotype. Sequences  
250 that are the only representative of a species are automatically added to the final database.  
251 Otherwise, all sequences for each species are extracted in turn, aligned with MAFFT, and  
252 collapsed to unique haplotypes with *collapsetypes\_4.6.pl* (zero differences allowed; [40]).  
253 Representative sequences are then unaligned and added to the final database.

254 iDNA samples

255 We used 242 collections of haematophagous terrestrial leeches from Deramakot Forest  
256 Reserve in Sabah, Malaysian Borneo stored in RNA fixating saturated ammonium sulfate  
257 solution as samples. Each sample consisted of one to 77 leech specimens (median 4). In  
258 total, 1532 leeches were collected, exported under the permit (JKM/MBS.1000-2/3 JLD.2 (8)

259 issued by the Sabah Biodiversity Council), and analysed at the laboratories of the Leibniz-  
260 IZW.

### 261 Laboratory workflow

262 The laboratory workflow is designed to both minimize the risk of sample cross-  
263 contamination and to aid identification of any instances that do occur. All laboratory steps  
264 (extraction, pre and post PCR steps, sequencing) took place in separate laboratories and no  
265 samples or materials were allowed to re-enter upstream laboratories at any point in the  
266 workflow. All sample handling was carried out under specific hoods that were wiped with  
267 bleach, sterilized, and UV irradiated for 30 minutes after each use. All labs are further UV  
268 irradiated for four hours each night.

#### 269 *DNA extraction*

270 DNA was extracted from each sample in bulk. Leeches were cut into small pieces with a  
271 fresh scalpel blade and incubated in lysate buffer (proteinase K and ATL buffer at a ratio of  
272 1:10; 0.2 ml per leech) overnight at 55 °C (12 hours minimum) in an appropriately sized  
273 vessel for the number of leeches (2 or 5 ml reaction tube). For samples with more than 35  
274 leeches, the reaction volume was split in two and recombined after lysis.

275 Each lysate was split into two *extraction replicates* (A and B; maximum volume 600 µl) and  
276 all further steps were applied to these independently. We followed the DNeasy 96 Blood &  
277 Tissue protocol for animal tissues (Qiagen, Hilden -Germany) on 96 plates for cleanup. DNA  
278 was eluted twice with 100 µl TE buffer. DNA concentration was measured with PicoGreen  
279 dsDNA Assay Kit (Quant-iT, ThermoFisherScientific, Waltham -USA) in 384-well plate format  
280 using an appropriate plate reader (200 PRO NanoQuant, Tecan Trading AG, Männedorf -  
281 Switzerland). Finally, all samples were diluted to a maximum concentration of 10 ng/µl.

#### 282 *Two-round PCR protocol*

283 We amplified three mitochondrial markers – a short 93 bp fragment of *16S* rRNA (*16S*), a  
284 389 bp fragment of *12S* rRNA (*12S*), and a 302 bp fragment of cytochrome b (*CytB*). For each  
285 marker, we ran a two-round PCR protocol (Figs. 1, 2). The primers were chosen on the  
286 expectation of successful DNA amplification over a large number of tetrapod species [41;  
287 42], and we tested the fit of candidate primers on an alignment of available mitochondrial  
288 sequences of 134 Southeast-Asian mammal species. Primer sequences are in Table 1.

289 *Primer modification.* – We modified primers of the three markers to avoid the production of  
290 unlabelled PCR products, to allow the detection and deletion of tag-jumping events [43],  
291 and to reduce the cost of primers and library preparation. We used two rounds of PCR. The  
292 first round amplified the target gene and attached one of 25 different ‘twin-tag’ pairs (*tag*  
293 *1*), identifying the sample within a given PCR. By ‘twin-tag,’ we mean that both the forward  
294 and reverse primers were given the *same* sample-identifying sequence (‘tags’) added as  
295 primer extensions (Fig. 2). The tags differed with a minimum pairwise distance of three  
296 nucleotides ([43]; Supplemental Table 1). These primers also contained different forward

297 and reverse sequences (*Read 1 & Read 2 sequence primers*) (Supplemental Table 1) to act  
298 priming sites for the second PCR round (Fig. 2).

299 The second round added the Illumina adapters for sequencing and attached one of 20 twin-  
300 tag pairs (*tag 2*) identifying the PCR, with a minimum pairwise distance of three [44]. These  
301 primers also contained the Illumina P5 and P7 adapter sequences (Fig. 2). Thus no  
302 unlabelled PCR products were ever produced, and the combination of *tags 1* and *2* allowed  
303 the pooling of up to 480 (=24 X 20) samples in a single library preparation step (one *tag 1*  
304 was reserved for controls). Twin tags allowed us later to detect and delete tag jumping  
305 events [43] (Fig. 2).

306 *Cycle number considerations.* – Because we know that our target DNA is at low  
307 concentration in the samples, we are faced with a trade-off between (1) using fewer PCR  
308 cycles (e.g. 30) to minimise amplification bias (caused by some target DNA binding better to  
309 the primer sequences and thus outcompeting other target sequences that bind less well  
310 [45]) and (2) using more PCR cycles (e.g. 40) to ensure that low-concentration target DNA is  
311 sufficiently amplified in the first place. Rather than choose between these two extremes, we  
312 ran both low- and high-cycle protocols and sequenced both sets of amplicons.

313 Thus, each of the two *extraction replicates* A and B was split and amplified using different  
314 cycle numbers (*PCR replicates 1* and *2*) for a total of four (= 2 *extraction replicates* x 2 *PCR*  
315 *replicates* -> *A1/A2* and *B1/B2*) replicates per sample per marker (Fig. 1). For *PCR replicates*  
316 *A1/B1*, we used 30 cycles in the first PCR round to minimize the effect of amplification bias.  
317 For *PCR replicates A2/B2*, we used 40 cycles in the first PCR round to increase the likelihood  
318 of detecting species with very low input DNA (Fig. 1).

319 *PCR protocol.* – The first-round PCR reaction volume was 20 µl, including 0.1 µM primer mix,  
320 0.2 mM dNTPs, 1.5 mM MgCl<sub>2</sub>, 1x PCR buffer, 0.5 U AmpliTaq Gold™ (Invitrogen, Karlsruhe -  
321 Germany), and 2 µl of template DNA. Initial denaturation was 5 minutes at 95°C, followed  
322 by repeated cycles of 30 seconds at 95°C, 30 seconds at 54°C, and 45 seconds at 72°C. Final  
323 elongation was 5 minutes at 72°C. Samples were amplified in batches of 24 plus a negative  
324 (water) and a positive control (bank vole, *Myodes glareolus* DNA). All three markers were  
325 amplified simultaneously in individual wells for each batch of samples in a single PCR plate.  
326 Non-target by-products were removed as required from some *12S* PCRs by purification with  
327 magnetic Agencourt AMPure beads (Beckman Coulter, Krefeld -Germany).

328 In the second-round PCR, we used the same PCR protocol as above with 2 µl of the product  
329 of the first-round PCR and 10 PCR cycles.

#### 330 *Quality control and sequencing*

331 Amplification was visually verified after the second-round PCR by gel electrophoresis on  
332 1.5% agarose gels. Controls were additionally checked with a TapeStation 2200 (D1000  
333 ScreenTape assay, Agilent, Waldbronn -Germany). All samples were purified with AMPure  
334 beads, using a bead-to-template ratio of 0.7:1 for *12S* and *CytB* products, and a ratio of 1:1  
335 for *16S* products. DNA concentration was measured with PicoGreen dsDNA as described

336 above. Sequencing libraries were made by equimolar pooling of all positive amplifications;  
337 final concentrations were between 2 and 4 nmol. Because of different amplicon lengths and  
338 therefore different binding affinities to the flow cell, *12S* and *CytB* products were combined  
339 in a single library, whereas positive *16S* products were always combined in a separate  
340 library. *12S/CytB* libraries were sequenced independently from *16S* libraries. Apart from our  
341 negative controls, we did not include samples that did not amplify, as this would have  
342 resulted in highly diluted libraries. Up to 11 libraries were sequenced on each run of  
343 Illumina MiSeq, following standard protocols. Libraries were sequenced with MiSeq Reagent  
344 Kit V3 (600 cycles, 300 bp paired-end reads) and had a final concentration of 11 pM spiked  
345 with 20 to 30% of PhiX control.

346 Bioinformatics workflow

347 *Read processing*

348 Although the curation of the reference databases is our main focus, it is just one part of the  
349 bioinformatics workflow for e/iDNA metabarcoding. A custom bash script was used to  
350 process raw basecall files into demultiplexed, cleaned, and dereplicated reads in FASTQ  
351 format on a run-by-run basis. All runs and amplicons were processed with the same settings  
352 unless otherwise indicated. *bcl2fastq* (Illumina) was used to convert the basecall file from  
353 each library to paired-end FASTQ files, demultiplexed into the separate PCRs via the *tag 2*  
354 pairs, allowing up to 1 mismatch in each *tag 2*. Each FASTQ file was further demultiplexed  
355 into samples via the *tag 1* pairs using *AdapterRemoval* (*AdapterRemoval*, RRID:SCR\_011834)  
356 [46], again allowing up to 1 mismatch in each tag. These steps allowed reads to be assigned  
357 to the correct samples.

358 In all cases, amplicons were short enough to expect paired reads to overlap. For libraries  
359 with more than 1000 reads pairs were merged with *usearch* (*-fastq\_mergepairs*; [47; 48]),  
360 and only successfully merged pairs were retained. For libraries with more than 500 merged  
361 pairs the primer sequences were trimmed away with *cutadapt* (*cutadapt*, RRID:SCR\_011841)  
362 [49], and only successfully trimmed reads at least 90% of expected amplicon length were  
363 passed to a quality filtering step with *usearch* (*-fastq\_filter*). Lastly, reads were dereplicated  
364 with *usearch* (*-derep\_fulllength*), and singletons were discarded. The number of replicates  
365 that each unique sequence represented was also added to the read header at this step  
366 (option *-sizeout*). The number of reads processed at each step for each sample are reported  
367 in a standard tab delimited txt-file.

368 *Taxonomic assignment*

369 The curated reference sequences and associated taxonomy were used for *PROTAX*  
370 taxonomic assignment of the dereplicated reads [24; 31]. *PROTAX* gives unbiased estimates  
371 of placement probability for each read at each taxonomic rank, allowing assignments to be  
372 made to a higher rank even when there is uncertainty at the species level. In other words,  
373 and unlike other taxonomic assignment methods, *PROTAX* can estimate the probability that  
374 a sequence belongs to a taxon that is not present in the reference database. This was  
375 considered an important feature due to the known incompleteness of the reference

376 databases for tetrapods in the sampled location. As other studies have compared *PROTAX*  
377 with more established methods, e.g. MEGAN [30] (see [4; 24]), it was beyond the scope of  
378 this study to evaluate the performance of *PROTAX*.

379 Classification with *PROTAX* is a two-step process. Firstly, *PROTAX* selected a subset of the  
380 reference database that was used as training data to parameterise a *PROTAX* model for  
381 each marker, and secondly, the fitted models were used to assign four taxonomic ranks  
382 (species, genus, family, order) to each of the dereplicated reads, along with a probability  
383 estimate at each level. We also included the best similarity score of the assigned species or  
384 genus, mined from the LAST results (see below) for each read. This was helpful for flagging  
385 problematic assignments for downstream manual inspection, i.e. high probability  
386 assignments based on low similarity scores (implying that there are no better matches  
387 available) and low probability assignments based on high similarity scores (indicates  
388 conflicting database signal from several species with highly similar sequences).

389 Fitting the *PROTAX* model followed Somervuo et al. [31] except that 5000 training  
390 sequences were randomly selected for each target marker due to the large size of the  
391 reference database. In each case, 4500 training sequences represented a mix of known  
392 species with reference sequences (conspecific sequences retained in the database) and  
393 known species without reference sequences (conspecific sequences omitted, simulating  
394 species missing from the database), and 500 sequences represented previously unknown  
395 lineages distributed evenly across the four taxonomic levels (i.e. mimicked a mix of  
396 completely novel species, genera, families and orders). Pairwise sequence similarities of  
397 queries and references were calculated with LAST [50] following the approach of Somervuo  
398 et al. [31]. The models were weighted towards the Bornean mammals expected in the  
399 sampled area by assigning a prior probability of 90% to these 103 species and a 10%  
400 probability to all others ([31]; Supplemental Table 2). In cases of missing interspecific  
401 variation, this helped to avoid assignments to geographically impossible taxa, especially in  
402 case of the very short 93 bp fragment of *16S*. Maximum *a posteriori* (MAP) parameter  
403 estimates were obtained following the approach of Somervuo et al. [24], but the models  
404 were parameterised for each of the four taxonomic levels independently, with a total of five  
405 parameters at each level (four regression coefficients and the probability of mislabelling).

406 Dereplicated reads for each sample were then classified using a custom bash script on a run-  
407 by-run basis. For each sample, reads in FASTQ format were converted to FASTA, and  
408 pairwise similarities were calculated against the full reference sequence database for the  
409 applicable marker with LAST (LAST, RRID:SCR\_006119). Assignments of each read to a  
410 taxonomic node based on these sequence similarities were made using a Perl script and the  
411 trained model for that level. The taxonomy of each node assignment was added with a  
412 second Perl script for a final table including the node assignment, probability, taxonomic  
413 level, and taxonomic path for each read. Read count information was included directly in  
414 the classification output via the size annotation added to the read headers during  
415 dereplication. All Perl scripts to convert input files into the formats expected by *PROTAX*, *R*



code for training the model following Somervuo et al. [31], and Perl scripts for taxonomic assignment were provided by P. Somervuo (personal communication).

#### *Acceptance criteria*

In total we had twelve PCR reactions per sample: two *extraction replicates A and B* X two *PCR replicates 1 and 2* per extraction replication X the three markers (Fig. 1). We applied two different acceptance criteria to the data with different stringency regimes. One more naive one that accepted any two positives out of the twelve *PCR replicates* (from now on referred to as *lax*), and one stringent one that only accepted taxonomic assignments that were positively detected in both *extraction replicates (A & B, Fig. 3)*. Our *lax* approach refers to one of the approaches of Ficetola et al. [19] where they evaluated different statistical approaches developed to estimate occupancy in the presence of observational errors and has been applied in other studies (e.g. [13]). The reason for conservatively omitting assignments that appeared in only one *extraction replicate* was to rule out sample cross-contamination during DNA extraction. In addition, we only accepted assignments with ten or more reads per marker, if only one marker was sequenced. If a species was assigned in more than one marker (e.g. *12S* and *16S*), we accepted the assignment even if in one sequencing run the number of reads was below ten.

Due to the imperfect PCR amplification of markers (the small *16S* fragment amplified better than the longer *CytB* fragment) and missing reference sequences in the database or shared sequence motifs between species, reads sometimes were assigned to species level for one marker but only to genus level for another marker. Thus, the final identification of species could not be automated, and manual inspection and curation was needed. For each assignment, three parameters were taken into consideration: number of sequencing reads, the mean probability estimate derived from *PROTAX*, and the mean sequence similarity to the reference sequences based on *LAST*.

#### *Shot-gun sequencing to quantify mammalian DNA content*

As the success of the metabarcoding largely depends on the mammal DNA quantity in our leech bulk samples we quantified the mammalian DNA content in a subset of 58 of our leech samples using shotgun sequencing. Extracted DNA was sheared with a Covaris M220 focused-ultra-sonicator to a peak target size of 100-200 bp, and re-checked for size distribution. Double-stranded Illumina sequencing libraries were prepared according to a ligation protocol designed by Fortes and Paijmans [51] with single 8 nt indices. All libraries were pooled equimolarly and sequenced on the MiSeq using the v3 150-cycle kit. We demultiplexed reads using *bcl2fastq* and *cutadapt* for trimming the adapters. We used *BLAST* (NCBI *BLAST*, RRID:SCR\_004870) search to identify reads and applied *Metagenome Analyzer MEGAN* (*MEGAN*, RRID:SCR\_011942) [30] to explore the taxonomic content of the data based on the NCBI taxonomy. Finally we used *KRONA* (*Krona*, RRID:SCR\_012785) [52] for visualisation of the results.

## Findings & Discussion

### Database curation

The Midori UNIQUE database (December 2015 version) contains 1,019,391 sequences across the four mitochondrial loci of interest (*12S*: 66,937; *16S*: 146,164; *CytB*: 223,247; *COI*: 583,043), covering all Metazoa. Of these, 258,225 (25.3%) derive from the four tetrapod classes (Amphibia: 55,254; Aves: 51,096; Mammalia: 101,106; Reptilia: 50,769). The distribution of these sequences between classes and loci, and the losses at each curation step are shown in Figure 4. In three of the four classes, there is a clear bias towards *CytB* sequences, with over 50% of sequences derived from this locus. In both Aves and Mammalia, the *16S* and *12S* loci are severely underrepresented at less than 10% each, while for Reptilia, *COI* is the least sequenced locus in the database.

The numbers of sequences and rates of loss due to our curation steps varied among taxonomic classes and the four loci, although losses were observed between steps in almost all instances. The most significant losses followed amplicon trimming and removal of non-unique sequences. Amplicon trimming led to especially high losses in Amphibia and *16S*, indicating that data published on GenBank for this class and marker do not generally overlap with our amplicons. Meanwhile, the high level of redundancy in public databases was highlighted by the significant reduction in the number of sequences during the final step of removing redundant sequences – in all cases over 10% of sequences was discarded, with some losses exceeding 50% (Mammalia: *COI*, *CytB*, *16S*; Amphibia: *16S*).

Data loss due to apparent mislabelling ranged between 1.9% and 7.4% and was thus generally higher than similar estimates for curated microbial databases [29]. SATIVA flags potential mislabels and suggests an alternative label supported by the phylogenetic placement of the sequences, allowing the user to make an appropriate decision on a case by case basis. The pipeline pauses after this step to allow such manual inspection to take place. However, for the current database, the number of sequences flagged was large (4378 in total), and the required taxonomic expertise was lacking, so all flagged sequences from non-target species were discarded to be conservative. The majority of mislabels were identified at species level (3053), but there were also significant numbers at genus (788), family (364) and order (102) level. Two to three sequences from Bornean mammal species were unflagged in each amplicon to retain the sequences in the database. This was important as in each case these were the only reference sequences available for the species. Additionally, *Muntiacus vaginalis* sequences that were automatically synonymised to *M. muntjak* based on the available information in the Catalogue of Life were revised back to their original identifications to reflect current taxonomic knowledge.

### Database composition

The final database was skewed even more strongly towards *CytB* than was the raw database. It was the most abundant locus for each class and represented over 60% of sequences for both Mammalia and Reptilia. In all classes, *16S* made up less than 10% of the final database, with Reptilia *COI* also at less than 10%.

495 Figure 5 shows that most species represented in the curated database for any locus have  
1 496 just one unique haplotype against which HTS reads can be compared; only a few species  
2 497 have many haplotypes. The prevalence of species with 20 or more haplotypes is particularly  
3 498 notable in *CytB* where the four classes have between 25 (Aves) and 265 (Mammalia) species  
4 499 in this category. The coloured circles in Figure 5 also show that the species of the taxonomy  
5 500 are incompletely represented across all loci, and that coverage varies significantly between  
6 501 taxonomic groups. In spite of global initiatives to generate *COI* sequences [53], this marker  
7 502 does not offer the best species-level coverage in any class and is a poor choice for Amphibia  
8 503 and Reptilia (<15% of species included). Even the best performing marker, *CytB*, is not a  
9 504 universally appropriate choice, as Amphibia is better covered by *12S*. These differences in  
10 505 underlying database composition will impact the likelihood of obtaining accurate taxonomic  
11 506 assignment for any one species from any single marker. Further barcoding campaigns are  
12 507 clearly needed to fill gaps in the reference databases for all markers and all classes to  
13 508 increase the power of future e/iDNA studies. As the costs of HTS decrease, we expect that  
14 509 such gap-filling will increasingly shift towards sequencing of whole mitochondrial genomes  
15 510 of specimen obtained from museum collections, trapping campaigns etc. [34], reducing the  
16 511 effect of marker choice on detection likelihood. In the meantime, however, the total  
17 512 number of species covered by the database can be increased by combining multiple loci  
18 513 (here, up to four) and thus the impacts of database gaps on correctly detecting species can  
19 514 be minimized ([54]; Fig. 6).

30 515 In the present study, the primary target for iDNA sampling was the mammal fauna of  
31 516 Malaysian Borneo, and the 103 species expected in the sampling area represent an  
32 517 informative case study highlighting the deficiencies in existing databases (Fig. 7). Nine  
33 518 species are completely unrepresented while only slightly over half (55 species) have at least  
34 519 one sequence for all of the loci. Individually, each marker covers over half of the target  
35 520 species, but none achieves more than 85% coverage (*12S*: 75 species; *16S*: 68; *CytB*: 88; *COI*:  
36 521 66). Equally striking is the lack of within-species diversity, as most of the incorporated  
37 522 species are represented by only a single haplotype per locus. Some of the species have large  
38 523 distribution ranges, so it is likely that in some cases the populations on Borneo differ  
39 524 genetically from the available reference sequences, possibly limiting assignment success.  
40 525 Only a few expected species have been sequenced extensively, and most are of economic  
41 526 importance to humans (e.g. *Bos taurus*, *Bubalus bubalis*, *Macaca* spp, *Paradoxurus*  
42 527 *hermaphroditus*, *Rattus* spp., *Sus scrofa*), with as many as 100 haplotypes available (*Canis*  
43 528 *lupus*). Other well-represented species ( $\geq 20$  haplotypes) present in the sampling area  
44 529 include several Muridae (*Chiropodomys gliroides*, *Leopoldamys sabanus*, *Maxomys surifer*,  
45 530 *Maxomys whiteheadi*) and the leopard cat (*Prionailurus bengalensis*).

#### 54 531 *Laboratory workflow*

56 532 Shotgun sequencing of a subset of our samples revealed that the median mammalian DNA  
57 533 content was only 0.9%, ranging from 0% to 98%. These estimates are approximate, but with  
58 534 more than 75% of the samples being below 5%, this shows clearly the scarcity of target DNA

535 in bulk iDNA samples. The generally low DNA content and the fact that the target DNA is  
536 often degraded make enrichment of the target barcoding loci necessary. We used PCR with  
537 high cycle numbers to obtain enough DNA for sequencing. However, this second step  
538 increases the risk of PCR error: artificial sequence variation, non-target amplification, and/or  
539 raising contaminations up to a detectable level.

540 We addressed these problems by running two *extraction replicates*, two *PCR replicates*, and  
541 a multi-marker approach. The need for *PCR replicates* has been acknowledged and  
542 addressed extensively in ancient DNA studies [16] and has also been highlighted for  
543 metabarcoding studies [19; 20; 55; 56]. Despite this, many e/iDNA studies do not carry out  
544 multiple *PCR replicates* to detect and omit potential false sequences. In addition, *extraction*  
545 *replicates* are seldom applied, despite the evidence that cross-sample DNA contamination  
546 can occur during DNA extraction [57; 58; 59]. We only accepted sequences that appeared in  
547 a minimum of two independent PCRs for the lax and for the stringent criterion, where it has  
548 to occur in each *extraction replicate A* and *B* (Fig. 1). The latter acceptance criterion is quite  
549 conservative and produces higher false negative rates than e.g. accepting occurrence of at  
550 least two positives. However, it also reduces the risk of accepting a false positives compared  
551 to it (see Supplemental Fig. 1. for a simulation of false positive and false negatives rates  
552 within a PCR), especially with increasing risk of false positive occurrence in a PCR for e.g.  
553 example due to higher risk of contamination etc.. Metabarcoding studies are very prone to  
554 false negatives, and downstream analyses like occupancy models for species distributions  
555 can account for imperfect detection and false negatives. However, methods for discounting  
556 false positive detections are not well developed [60]. Thus we think it is more important to  
557 avoid false positives, especially if the results will be used to make management decisions  
558 regarding rare or endangered species. In contrast, it might be acceptable to use a relaxed  
559 acceptance criterion for more common species, as long as the rate false-positives/true-  
560 positives is small and does not affect species distribution estimates. Employing both of our  
561 tested criteria researchers could flag unreliable assignments and management decisions can  
562 still use this information, but now in a forewarned way. An alternative to our acceptance  
563 criteria could be use the PCR replicates itself to model the detection probability within a  
564 sample using an occupancy framework [20; 60; 61; 62].

565 We used three different loci to correct for potential PCR-amplification biases. We were,  
566 however, unable to quantify this bias in this study due to the high degradation of the target  
567 mammalian DNA, which resulted in much higher overall amplification rates for *16S*, the  
568 shortest of our PCR amplicons. For *16S*, 85% of the samples amplified, whereas for *CytB* and  
569 *12S*, only 57% and 44% amplified, respectively. Also the read losses due to trimming and  
570 quality filtering were significantly lower for the *16S* sequencing runs (1.3% and 5.3% in  
571 average, Supplemental Table 3) compared to the sequencing runs for the longer fragments  
572 of *12S* and *CytB* (65.3% and 44.3% in average, Supplemental Table 3). Despite the greater  
573 taxonomic resolution of the longer *12S* and *CytB* fragments, our poorer amplification and  
574 sequencing results for these longer fragments emphasize that e/iDNA studies should

575 generally focus on short PCR fragments to increase the likelihood of positive amplifications  
576 of the degraded target DNA. In the case of mammal-focussed e/iDNA studies, developing a  
577 shorter (100 bp) *CytB* fragment would likely be very useful.

578 Another major precaution was the use of twin-tagging for both PCRs (Fig. 2). This ensures  
579 that unlabelled PCR products are never produced and allows us to multiplex a large number  
580 of samples on a single run of Illumina MiSeq run. Just 24 sample *tags 1* and 20 plate *tags 2*  
581 allow the differentiation of up to 480 samples with matching tags on both ends. The same  
582 number of individual primers would have needed longer tags to maintain enough distance  
583 between them and would have resulted in an even longer adapter-tag overhang compared  
584 to primer length. This would have most likely resulted in lower binding efficiencies due to  
585 steric hindrances of the primers. Furthermore, this would have resulted in increased primer  
586 costs. Thus our approach reduced sequencing and primer purchase costs while at the same  
587 time largely eliminating sample mis-assignment via tag jumping, because tag-jump  
588 sequences have non-matching forward and reverse *tag 1* sequences [43]. We estimated the  
589 rate of tag jumps producing non-matching *tag 1* sequences to be 1 to 5%, and these were  
590 removed from the dataset (Table 4). For our sequenced PCR plates, the rate of non-  
591 matching *tag 2* tags was 2%. These numbers are smaller than data from Zepeda-Mendoza et  
592 al. [56] who reported on sequence losses of 19% to 23% due to unused tag combinations  
593 when they tested their DAME pipeline to different datasets built using standard blunt-end  
594 ligation technique. Although their numbers might not be one-to-one comparable to our  
595 results as they counted unique sequences, and we report on read numbers, our PCR  
596 libraries with matching barcodes seem reduce the risk of tag jumping compared to blunt-  
597 end ligation techniques. For the second PCR round, we used the same tag pair *tag 2* for all  
598 24 samples of a PCR plate. In order to reduce cost we tested pooling these 24 samples prior  
599 to the second PCR round, but we detected a very high tag jumping rate of over 40% (Table  
600 4), which ultimately would increase cost through reduced sequencing efficiency. Twin-  
601 tagging increases costs because of the need to purchase a larger number of primer pairs but  
602 at the same time it increases confidence in the results.

603 Tagging primers in the first PCR reduces the risk of cross-contamination via aerosolised PCR  
604 products. However, we would not be able to detect a contamination prior the second PCR  
605 from one plate to another, as we used the same 24 tags (*tag 1*) for all plates. Nevertheless  
606 such a contamination is very unlikely to result in any accepted false positive as it would be  
607 improbable to contaminate both the A and B replicates, given the exchange of all reagents  
608 and the time gap between the PCRs. Previous studies have shown that unlabelled volatile  
609 PCR products pose a great risk of false detections [63], a risk that is greatly increased if a  
610 high number of samples are analysed in the laboratories [13]. Also, in laboratories where  
611 other research projects are conducted, this approach allows the detection of cross-  
612 experiment contamination. Therefore, we see a clear advantage of our approach over  
613 ligation techniques when it comes to producing sequencing libraries, as the Illumina tags are

614 only added after the first PCR, and thus the risk of cross contamination with unlabelled PCR  
615 amplicons is very low.

### 616 *Assignment results*

617 A robust assignment of species is an important factor in metabarcoding as an incorrect  
618 identification might result incorrect management interventions. The reliability of taxonomic  
619 assignments is expected to vary with respect to both marker information content and  
620 database completeness, and this is reflected in the probability estimates provided by  
621 *PROTAX*. In a recent study, less than 10% of the mammal assignments made at species level  
622 against a worldwide reference database were considered reliable with the short *16S*  
623 amplicon, but this increased to 46% with full-length *16S* sequences [31]. In contrast, in the  
624 same study over 80% of insect assignments at species level were considered reliable with a  
625 more complete, geographically restricted database of full-length COI barcodes. A similar  
626 pattern was observed in our data during manual curation of the assignment results – there  
627 was more ambiguity in the results for the short *16S* amplicon than for other markers.  
628 However, due to the limited amount of often degraded target DNA in e/iDNA samples, short  
629 amplicons amplify much better. In our case, this had the drawback that some species lacked  
630 any interspecific variation, and thus sequencing reads shared 99%-100% identity for several  
631 species. For example, our only *16S* reference of *Sus barbatus* was 100% identical to *S.*  
632 *scrofa*. But as latter species does not occur in the studied area we could assign all reads  
633 manually to *S. barbatus*. In several cases we were able to confirm *S. barbatus* by additional  
634 *CytB* results, highlighting the usefulness of multiple markers.

635 Another advantage of multiple markers is the opportunity to fill gaps in the reference  
636 database. For example, we lacked *16S* reference sequences for *Hystrix brachyura*, and reads  
637 were assigned by *PROTAX* only to the unknown species *Hystrix* sp.. In one sample, however,  
638 almost 5000 *CytB* reads could be confidently assigned to *Hystrix brachyura*, and thus we  
639 used the *Hystrix* sp. *16S* sequences in the same sample to build a consensus *16S* reference  
640 sequence for *Hystrix brachyura* for future analyses. In another example we had *CytB* reads  
641 assigned to *Mydaus javanicus*, the Sunda stink-badger in one sample but *12S* reads assigned  
642 to *Mydaus* sp. in another one. As we lacked a *12S Mydaus* reference and as there is only one  
643 *Mydaus* species on Borneo we could assume that this second sample is most likely also  
644 *Mydaus javanicus*.

645 We also inferred that PCR and sequencing errors resulted in reads being assigned to sister  
646 taxa. We observed that a high number of reads of a true sequence were assigned to a  
647 species and a lower number of noise sequences were assigned to a sister taxon. Such a  
648 pattern was observed for ungulates, especially deer that showed little variance in *16S*. It is  
649 hard to identify and control for such pattern automatically, and it highlights the importance  
650 of visual inspection of the results.

651 For the more lax criterion (two positive *PCR replicates*) we accepted 190 species  
652 assignments out of 109 leech samples. Under the stringent criterion (i.e. having positive  
653 detections in both *extraction replicates A and B*) we accepted about 14% assignments less;

654 in total 162 vertebrate detections within 95 bulk samples (Table 5). For 48% of the species  
655 frequencies did not change and almost half of the not accepted assignments were from the  
656 most frequent species *Rusa unicolor* and *Sus barbatus*. However, with the more stringent  
657 criterion we did not accept two species (1x *Macaca fascicularis* & 2x *Mydaus javanensis*). In  
658 three cases the stringent criterion would not accept assignments that could be made only to  
659 unknown species (*Macaca* sp.) (Table 5). For this genus we have two occurring species in  
660 the area. As the true occurrence of species within our leeches was unknown we cannot  
661 evaluate how many of the additional 27 detections in the lax criterion are false positives and  
662 how many might be false negatives for the stricter criterion. However, by accepting only  
663 positive *AB* assignment results, we increase the confidence of species detection, even if the  
664 total number of reads for that species was low. When it comes to rare or threatened species  
665 this outweighs the risk of reporting false positives to our opinion. 48% of the assignments  
666 with the stringent criterion were present in all four *A1*, *A2*, *B1* and *B2*. 35% were present in  
667 at least three replicates (e.g. *A1*, *A2*, *B1*).

668 The mean number of reads per sample used for the taxonomic assignment varied from  
669 162,487 *16S* reads for SeqRun01 to 7,638 *CytB* reads for SeqRun05 (Supplemental Table 4).  
670 In almost all cases, however, the number of reads of an accepted assignment was high  
671 (median= 52,386; mean= 300,996; SD= 326,883). PCR stochasticity, primer biases, multiple  
672 species in individual samples, and pooling of samples exert too many uncertainties that  
673 could bias the sequencing results [64; 65]. Thus we do not believe that raw read numbers  
674 are the most reliable indicators of tetrapod DNA quantity in iDNA samples. Replication of  
675 detection is inherently more reliable. In contrast to our expectation that higher cycle  
676 number might be necessary to amplify even the lowest amounts of target DNA, our data do  
677 not support this hypothesis. Although we observed an increase in positive PCRs for *A2/B2*  
678 (the 40-cycle PCR replicates), the total number of accepted assignments in *A1/B1* and *A2/B2*  
679 samples did not differ. This indicates first that high PCR cycle numbers mainly increased the  
680 risk of false positives and second that our multiple precautions successfully minimized the  
681 acceptance of false detections.

## 682 Conclusion

683 Metabarcoding of e/iDNA samples will certainly become a very valuable tool in assessing  
684 biodiversity, as it allows to detect species non-invasively without the need to capture and  
685 handle the animals [66] and because sampling effort can often be greatly reduced.  
686 However, the technical and analytical challenges linked to sample types (low quantity and  
687 quality DNA) and poor reference databases have so far been insufficiently recognized. In  
688 contrast to ancient DNA studies where standardized laboratory procedures and specialized  
689 bioinformatics pipelines have been established and are followed in most cases, there is  
690 limited methodological consensus in e/iDNA studies, which reduces rigour. In this study, we  
691 present a robust metabarcoding workflow for e/iDNA studies. We hope that the provided  
692 scripts and protocols facilitate further technical and analytical developments. The use of  
693 e/iDNA metabarcoding to study the rarest and most endangered species such as the Saola is

694 exciting, but geneticists bear the heavy responsibility of providing correct answers to  
695 conservationists.

### 696 **Availability of supporting data**

697 Sequencing data is available in the EBI via bioproject number: PRJEB27367. All other  
698 supporting data are also available via the *GigaScience* GigaDB repository [67].

### 700 **List of abbreviations**

701 Amplicon: amplification of a short target sequence; BOLD: Barcode of Life Database; CoL:  
702 Catalogue of Life database; CytB: cytochrome b; eDNA: environmental DNA; iDNA:  
703 invertebrate-derived DNA; INSDC: International Nucleotide Sequence Database  
704 Collaboration; ITIS: Integrated Taxonomic Information System; MEGAN: Metagenome  
705 Analyzer; PCR: polymerase chain reaction; 12S: 12S rRNA; 16S: 16S rRNA.

### 707 **Competing interests**

708 None.

### 710 **Acknowledgements**

711 All authors thank the German Federal Ministry of Education and Research (BMBF FKZ:  
712 01LN1301A) and the Leibniz-IZW for funding this study. We also thank the Sabah Forestry  
713 Department, especially Johnny Kissing, Peter Lagan and Datuk Sam Mannan for supporting  
714 the fieldwork and the Sabah Biodiversity Council for providing research, collection and  
715 export permits for this work. We are grateful to John Mathai, Seth Timothy Wong for  
716 conducting the field work and collecting the leeches. We are also grateful to Jörns Fickel,  
717 head of the Department Evolutionary Genetics of the Leibniz-IZW for continuous support  
718 and collaboration. Furthermore we would like to thank Sebastian Wieser for lab-support,  
719 Dorina Lenz and Anke Schmidt for their help and fruitful discussions. C.C.Y. Xu was also  
720 supported by the MEME Erasmus Mundus Programme in Evolutionary Biology, and by the  
721 Groningen University Fund and the Marco Polo Fund from the University of Groningen. D.W.  
722 Yu and C.C.Y. Xu were supported by the National Natural Science Foundation of China  
723 (41661144002, 31670536, 31400470, 31500305), the Key Research Program of Frontier  
724 Sciences, CAS (QYZDY-SSW-SMC024), the Bureau of International Cooperation project  
725 (GJHZ1754), the Strategic Priority Research Program of the Chinese Academy of Sciences  
726 (XDA20050202, XDB31000000), the Ministry of Science and Technology of China  
727 (2012FY110800), and the State Key Laboratory of Genetic Resources and Evolution at the  
728 Kunming Institute of Zoology.



## References

- 729
- 1 730 [1] Garipey TD, Lindsay R, Odgen N, Greory TR. Identifying the last supper: utility of the  
2 731 DNA barcode library for bloodmeal identification in ticks. *Mol Ecol Res.* 2012; 12:  
3 732 646-52.
- 4 733 [2] Lee P-S, Gan HM, Clements GR, Wilson J-J. Field calibration of blowfly-derived DNA  
5 734 against traditional methods for assessing mammal diversity in tropical forests.  
6 735 *Genome* 2016;59: 1008-22.
- 7 736 [3] Calvignac-Spencer S, Merkel K, Kutzner N, et al.. Carrion fly-derived DNA as a tool for  
8 737 comprehensive and cost-effective assessment of mammalian biodiversity. *Mol Ecol*  
9 738 2013; 22: 915-24.
- 10 739 [4] Rodgers TW, Xu CCY, Giacalone J, et al.. Carrion fly-derived DNA metabarcoding is  
11 740 an effective tool for mammal surveys: Evidence from a known tropical mammal  
12 741 community. *Mol Ecol Res.* 2017; 17(6):1-13
- 13 742 [5] Hoffmann C, Merkel K, Sachse A, et al.. Blow flies as urban wildlife sensors. *Mol Ecol*  
14 743 *Res.* 2018; 18(3):502-10
- 15 744 [6] Schönberger AC, Wagner S, Tuten HC, et al.. Host preferences in host-seeking and  
16 745 632 blood-fed mosquitoes in Switzerland. *Med Vet Entomol.* 2015; 30(1): 39-52.
- 17 746 [7] Townzen JS, Brower AVZ, Judd DD. Identification of mosquito bloodmeals using  
18 747 mitochondrial cytochrome oxidase subunit I and cytochrome b gene sequences. *Med*  
19 748 *Vet Entomol.* 2008; 22. 386-93.
- 20 749 [8] Kocher A, Thoisy B, Catzeflies F, et al.. iDNA screening: Disease vectors as vertebrate  
21 750 samplers. *Mol Ecol.* 2017; 26(22): 6478-86.
- 22 751 [9] Taylor L, Cummings RF, Velten R, et al.. Host (Avian) Biting Preference of Southern  
23 752 California *Culex* Mosquitoes (Diptera: Culicidae). *J Med Entomol.* 2012; 49(3): 687-  
24 753 96.
- 25 754 [10] Schnell IB, Thomsen PF, Wilkinson N, et al.. Screening mammal biodiversity using  
26 755 DNA from leeches. *Curr Biol.* 2012, 22(8): R262—3.
- 27 756 [11] Tessler M, Weiskopf SR, Berniker L, et al.. Bloodlines: mammals, leeches, and  
28 757 conservation in southern Asia. *Syst Biodivers.* 2018; 1-9.
- 29 758 [12] Weiskopf SR, McCarthy KP, Tessler M, et al.. Using terrestrial haematophagous  
30 759 leeches to enhance tropical biodiversity monitoring programmes in Bangladesh. *J*  
31 760 *Appl Ecol.* 2018: 1-11.
- 32 761 [13] Schnell IB, Bohmann K, Schultze SE, et al.. Debugging diversity - a pan-continental  
33 762 exploration of the potential of terrestrial blood-feeding leeches as a vertebrate  
34 763 monitoring tool. *Mol Ecol Res.* 2018.
- 35 764 [14] Calvignac-Spencer S, Leendertz FH, Gilbert MT, Schubert G. An invertebrate  
36 765 stomach's view on vertebrate ecology: certain invertebrates could be used as  
37 766 "vertebrate samplers" and deliver DNA-based information on many aspects of  
38 767 vertebrate ecology. *BioEssays.* 2013; 35(11): 1004-13.

- 1 768 [15] Schnell IB, Sollmann R, Calvignac-Spencer S, et al.. iDNA from terrestrial  
2 769 haematophagous leeches as a wildlife surveying and monitoring tool – prospects,  
3 770 pitfalls and avenues to be developed. *Front Zool.* 2015; 12:24.
- 4 771 [16] Pääbo S, Poinar H, Serre D, et al.. Genetic analyses from ancient DNA. *Annu Rev*  
5 772 *Genet.* 2004; 38: 645-79.
- 6 773 [17] Hofreiter M, Paijmans JL, Goodchild H, et al. The future of ancient DNA: Technical  
7 774 advances and conceptual shifts. *BioEssays.* 2015; 37(3): 284-93.
- 8 775 [18] Cristescu ME, Hebert , PDN. Uses and Misuses of Environmental DNA in Biodiversity  
9 776 Science and Conservation. Cristescu, Melania E und Hebert, Paul D N. 1, 2018, *Annu*  
10 777 *Rev Ecol Evol Syst* 2018; 49.
- 11 778 [19] Ficetola GF, Pansu J, Bonin A, et al.. Replication levels, false presences and the  
12 779 estimation of the presence/absence from eDNA metabarcoding data. *Mol Ecol Res.*  
13 780 2014; 15(3): 543-56.
- 14 781 [20] Ficetola GF, Taberlet P., Coissac E. How to limit false positives in environmental DNA  
15 782 and metabarcoding? *Mol Ecol Res.* 2016; 16(3): 604-7.
- 16 783 [21] Dalton R. Still looking for that woodpecker. *Nature* 2010; 463: 718-9.
- 17 784 [22] Bazinet AL, Cummings MP. A comparative evaluation of sequence classification  
18 785 programs. *BMC bioinformatics.* 2012; 13(1): 92.
- 19 786 [23] Richardson RT, Bengtsson-Palme J, Johnson RM. Evaluating and optimizing the  
20 787 performance of software commonly used for the taxonomic classification of DNA  
21 788 metabarcoding sequence data. *Mol Ecol Res.* 2017; 17(4): 760-9.
- 22 789 [24] Somervuo P, Koskela S, Pennanen J, Henrik Nilsson R, Ovaskainen O. Unbiased  
23 790 probabilistic taxonomic classification for DNA barcoding. *Bioinformatics.* 2016;  
24 791 32(19): 2920-7.
- 25 792 [25] Quast C, Pruesse E, Gerken J, et al.. SILVA Databases. In: Nelson KE (eds)  
26 793 *Encyclopedia of Metagenomics.* Springer, Boston 2015; 626-35.
- 27 794 [26] Nilsson RH, Ryberg M. Taxonomic Reliability of DNA Sequences in Public Sequence  
28 795 Databases: A Fungal Persepective. *PLoS ONE.* 1, 2006; 1.
- 29 796 [27] Forster P. To Err is Human. *Ann Hum Gen* 2003; 67: 2-4.
- 30 797 [28] Harris JD. Can you bank on GenBank? *Trends Ecol Evol.* 2003; 18: 317-9.  
31 798 doi:10.1016/S0169-5347(03)00150-2.
- 32 799 [29] Kozlov AM, Zhang J, Yilmaz P, Glöckner FO, Stamatakis A. Phylogeny-aware  
33 800 identification and correction of taxonomically mislabeled sequences. *Nucleic Acids*  
34 801 *Res.* 2016; 44(11): 5022-33.
- 35 802 [30] Huson DH, Auch AF, Qi J, Schuster SC. MEGAN analysis of metagenomic data.  
36 803 *Genome Res.* 2007; 17(3): 377-86.
- 37 804 [31] Somervuo P, Yu DW, Xu CC, Ji Y, et al.. Quantifying uncertainty of taxonomic  
38 805 placement in DNA barcoding and metabarcoding. *Methods Ecol Evol.* 2017; 8(4):  
39 806 398-407.

- 1 807 [32] Machida RJ, Leray M, Ho SL, Knowlton N. Metazoan mitochondrial gene sequence  
2 808 reference datasets for taxonomic assignment of environmental samples. *Sci Data*.  
3 809 2017; 4: 170027.
- 4 810 [33] Chamberlain SA, Szöcs E. taxize: taxonomic search and retrieval in R. Version 2.  
5 811 *F1000Res*. 2013; 2: 191.
- 6 812 [34] Salleh FM, Ramos-Madrigal J, Peñaloza F, et al.. An expanded mammal mitogenome  
7 813 dataset from Southeast Asia. *GigaScience*. 2017; 6(8): 1-8
- 8 814 [35] Kans, Jonathan. Entrez Direct: E-utilities on the UNIX Command Line. In: Entrez  
9 815 Programming Utilities Help [Internet]. Bethesda (MD): National Center for  
10 816 Biotechnology Information (US). 2010.
- 11 817 [36] Altschul SF, Gish W, Miller W, Myers EW, Lipman DJ. Basic local alignment search  
12 818 tool. *Journal of molecular biology*. 1990; 215(3):, 403-10.
- 13 819 [37] Camacho C, Coulouris G, Avagyan V, et al. BLAST+: architecture and applications.  
14 820 *BMC bioinformatics*. 2009; 10(1): 421.
- 15 821 [38] Katoh K, Standley DM. (2013). MAFFT multiple sequence alignment software version  
16 822 7: improvements in performance and usability. *Mol Biol Evol*. 2013; 30(4): 772-80.
- 17 823 [39] Katoh K, Misawa K, Kuma KI, Miyata T. MAFFT: a novel method for rapid multiple  
18 824 sequence alignment based on fast Fourier transform. *Nucleic Acids Res*. 2002;  
19 825 30(14): 3059-66.
- 20 826 [40] Chesters D. (2013) `collapsetypes.pl` <http://sourceforge.net/projects/collapsetypes/>  
21 827 Accessed 1<sup>st</sup> Feb 2019
- 22 828 [41] Kocher TD, Thomas WK, Meyer A, et al.. Dynamics of mitochondrial DNA evolution in  
23 829 animals: amplification and sequencing with conserved primers. *Proc. Natl. Acad. Sci*.  
24 830 U.S.A.. 1989; 86(16): 6196-6200.
- 25 831 [42] Taylor PG. Reproducibility of ancient DNA sequences from extinct Pleistocene fauna.  
26 832 *Mol Biol Evol*. 1996; 13(1): 283-5.
- 27 833 [43] Schnell IB, Bohmann K, Gilbert MTP. Tag jumps illuminated—reducing sequence-to-  
28 834 sample misidentifications in metabarcoding studies. *Mol Ecol Res*. 2015; 15(6): 1289-  
29 835 1303.
- 30 836 [44] Faircloth BC, Glenn TC. Not all sequence tags are created equal: designing and  
31 837 validating sequence identification tags robust to indels. *PLoS One*. 2012; 7(8): e42543
- 32 838 [45] Murray DC, Coghlan ML, Bunce M. From benchtop to desktop: important  
33 839 considerations when designing amplicon sequencing workflows. *PLoS One*. 2015;  
34 840 10(4): e0124671.
- 35 841 [46] Schubert M, Lindgreen S, Orlando L. AdapterRemoval v2: rapid adapter trimming,  
36 842 identification, and read merging. *BMC Research Notes* 2016; 9.
- 37 843 [47] Edgar RC. Search and clustering orders of magnitude faster than BLAST.  
38 844 *Bioinformatics*. 2010; 26(19): 2460-2461.
- 39 845 [48] Edgar RC, Flyvbjerg H. Error filtering, pair assembly and error correction for next-  
40 846 generation sequencing reads. *Bioinformatics*. 2015; 31(21): 3476-82.

- 1 847 [49] Martin M. Cutadapt removes adapter sequences from high-throughput sequencing  
2 848 reads. *EMBnet. Journal*. 2011; 17(1): 10-12.
- 3 849 [50] Kiełbasa SM, Wan R, Sato K, Horton P, Frith MC. Adaptive seeds tame genomic  
4 850 sequence comparison. *Genome Res*. 2011; 21(3): 487-493.
- 5  
6 851 [51] Fortes GG, Paijmans JLA. Analysis of Whole Mitogenomes from Ancient Samples. In:  
7 852 Kroneis T (eds). *Whole Genome Amplification: Methods and Protocols*. Springer New  
8 853 York 2015; 179-195.
- 9  
10 854 [52] Ondov BD, Bergman NH, Phillippy AM. Interactive metagenomic visualization in a  
11 855 Web browser. *BMC Bioinformatics* 2011; 12: 385.
- 12  
13 856 [53] Ratnasingham S, Hebert PDN. BOLD: The Barcode of Life Data System  
14 857 ([www.barcodinglife.org](http://www.barcodinglife.org)). *Mol Ecol Notes*. 2007; 3: 355-64.
- 15  
16 858 [54] Evans NT, Li Y, Renshaw MA, et al. Fish community assessment with eDNA  
17 859 metabarcoding: effects of sampling design and bioinformatic filtering. *Can J Fish*  
18 860 *Aquat Sci*. 2017; 74(9):, 1362-74.
- 19  
20 861 [55] Bonin A, Taberlet P, Zinger L, Coissac E. *Environmental DNA: For Biodiversity*  
21 862 *Research and Monitoring*. 1st ed. Oxford University Press; 2018.
- 22  
23 863 [56] Zepeda-Mendoza ML, Bohmann K, Baez A, Gilbert M., DAME: a toolkit for the initial  
24 864 processing of datasets with PCR replicates of double-tagged amplicons for DNA  
25 865 metabarcoding analyses. *BMC Res Notes* 2016; 9.
- 26  
27 866 [57] Racimo F, Renaud G, Slatkin M. Joint estimation of contamination, error and  
28 867 demography for nuclear DNA from ancient humans. *PLoS Genet*. 2016; 12(4):  
29 868 e1005972.
- 30  
31 869 [58] Orlando L, Gilbert MTP, Willerslev E. Reconstructing ancient genomes and  
32 870 epigenomes. *Nat Rev Genet* 2015; 16(7): 395
- 33  
34 871 [59] Laurin-Lemay S, Brinkmann H, Philippe H. Origin of land plants revisited in the light  
35 872 of sequence contamination and missing data. *Current Biology*. 2012; 22(15): R593-4.
- 36  
37 873 [60] Lahoz-Monfort JJ, Guillera-Arroita G, Tingley R. Statistical approaches to account for  
38 874 false-positive errors in environmental DNA samples. *Mol Ecol Res*. 2015; 16: 673-85.
- 39  
40 875 [61] Dorazio RM, Erickson RA. ednaoccupancy: An R package for multiscale occupancy  
41 876 modelling of environmental DNA data. *Mol Ecol Res*. 2018; 18: 368-80.
- 42  
43 877 [62] Guillera-Arriota G, Lahoz-Monfort JJ, van Rooyen AR, et al.. Dealing with false-  
44 878 positives and false-negative errors about species occurrence at multiple levels.  
45 879 *Methods Ecol Evol*. 2017; 8: 1081-91
- 46  
47 880 [63] Kwok S, Higuchi R. Avoiding false positives with PCR. *Nature*. 1989; 339: 237-8.
- 48  
49 881 [64] Bush A, Sollmann R, Wilting A, et al. Connecting Earth observation to high-  
50 882 throughput biodiversity data. *Nat Ecol Evol* 2017; 1(7): 0176
- 51  
52 883 [65] Piñol J, Mir G, Gomez-Polo P, Agustí N. Universal and blocking primer mismatches  
53 884 limit the use of high-throughput DNA sequencing for the quantitative metabarcoding  
54 885 of arthropods., *Mol Ecol Res*.2014; 15: 819-30.

886 [66] Nichols RV, Vollmers C, Newsom L, et al.. Minimizing polymerase biases in  
1 887 metabarcoding. Mol Ecol Res. 2018; 18: 927-39.  
2  
3 888 [67] Axtner J; Crampton-Platt A; Hörig L; Mohamed A; Xu CCY; Yu DW; Wilting A (2019):  
4 889 Supporting data for "An efficient and improved laboratory workflow and tetrapod database  
5 890 for larger scale eDNA studies" GigaScience Database. <http://dx.doi.org/10.5524/100570>  
6  
7  
8  
9  
10  
11  
12  
13  
14  
15  
16  
17  
18  
19  
20  
21  
22  
23  
24  
25  
26  
27  
28  
29  
30  
31  
32  
33  
34  
35  
36  
37  
38  
39  
40  
41  
42  
43  
44  
45  
46  
47  
48  
49  
50  
51  
52  
53  
54  
55  
56  
57  
58  
59  
60  
61  
62  
63  
64  
65

891 **Table 1:** Sequence motifs that compose the 25 different target primers for the first and the  
 892 second PCR. First PCR primers consist of target specific primer followed by an overhang out  
 893 of sample specific *tag 1* and *read 1* and *read 2* sequencing primer, respectively. The second  
 894 PCR primers consist of the *read 1* or the *read 2* sequencing primer followed by an plate  
 895 specific *tag 2* and the P5 and P7 adapters, respectively (see also Fig. 2).  
 896

| Name                         | Sequence                             | Reference                             |
|------------------------------|--------------------------------------|---------------------------------------|
| tag A                        | TGCAT                                | Faircloth & and Glenn 2012            |
| tag B                        | TCAGC                                | Faircloth & and Glenn 2012            |
| tag C                        | AAGCG                                | Faircloth & and Glenn 2012            |
| tag D                        | ACAAG                                | Faircloth & and Glenn 2012            |
| tag E                        | AGTGG                                | Faircloth & and Glenn 2012            |
| tag F                        | TTGAC                                | Faircloth & and Glenn 2012            |
| tag G                        | CCTAT                                | Faircloth & and Glenn 2012            |
| tag H                        | GGATG                                | Faircloth & and Glenn 2012            |
| tag I                        | CTAGG                                | Faircloth & and Glenn 2012            |
| tag K                        | CACCT                                | Faircloth & and Glenn 2012            |
| tag L                        | GTCAA                                | Faircloth & and Glenn 2012            |
| tag M                        | GAAGT                                | Faircloth & and Glenn 2012            |
| tag N                        | CGGTT                                | Faircloth & and Glenn 2012            |
| tag O                        | ACCGA                                | Faircloth & and Glenn 2012            |
| tag P                        | ACGTC                                | Faircloth & and Glenn 2012            |
| tag Q                        | AGACT                                | Faircloth & and Glenn 2012            |
| tag R                        | AGGAA                                | Faircloth & and Glenn 2012            |
| tag S                        | ATCC                                 | Faircloth & and Glenn 2012            |
| tag T                        | CAATC                                | Faircloth & and Glenn 2012            |
| tag V                        | CATGA                                | Faircloth & and Glenn 2012            |
| tag W                        | CCACA                                | Faircloth & and Glenn 2012            |
| tag X                        | GCTTA                                | Faircloth & and Glenn 2012            |
| tag Y                        | GGTAC                                | Faircloth & and Glenn 2012            |
| tag Z                        | AACAC                                | Faircloth & and Glenn 2012            |
| Tag Control                  | ATCTG                                | Faircloth & and Glenn 2012            |
| <i>CytB</i> -fw              | AAAAAGCTTCCATCCAACATCTCAGCATGATGAAA  | Kocher et al. 1989                    |
| <i>CytB</i> -rv              | AAACTGCAGCCCCTCAGAATGATATTTGTCCTCA   | Kocher et al. 1989                    |
| <i>16S</i> -fw               | CGGTTGGGGTGACCTCGGA                  | Taylor 1996                           |
| <i>16S</i> -rv               | GCTGTTATCCCTAGGGTAACT                | Taylor 1996                           |
| <i>12S</i> -fw               | AAAAAGCTTCAAACCTGGGATTAGATACCCCACTAT | Kocher et al. 1989                    |
| <i>12S</i> -rv               | TGACTGCAGAGGGTGACGGCGGTGTGT          | Kocher et al. 1989                    |
| Read 1<br>sequence<br>primer | ACACTCTTTCCCTACACGACGCTCTTCCGATCT    | Illumina Document # 1000000002694 v03 |
| Read 2<br>sequence<br>primer | GTGACTGGAGTTCAGACGTGTGCTCTTCCGATCT   | Illumina Document # 1000000002694 v03 |
| P5 adapter                   | AATGATACGGCGACCACCGAGATCTACAC        | Illumina Document # 1000000002694 v03 |
| P7 adapter                   | CAAGCAGAAGACGGCATACGAGAT             | Illumina Document # 1000000002694 v03 |

897

**Table 2:** Main steps undertaken by each module of the database curation script.

| MODULE   | STEPS                                                                                                                                                                                                                                                                                                                                                                                                                                                                                                                                                                                                                                                                                                                  |
|----------|------------------------------------------------------------------------------------------------------------------------------------------------------------------------------------------------------------------------------------------------------------------------------------------------------------------------------------------------------------------------------------------------------------------------------------------------------------------------------------------------------------------------------------------------------------------------------------------------------------------------------------------------------------------------------------------------------------------------|
| Module 1 | <p data-bbox="432 338 1259 376">Extract subset of raw Midori database for query taxon and loci.</p> <p data-bbox="432 398 1238 479">Remove sequences with non-binomial species names, reduce subspecies to species labels</p> <p data-bbox="432 501 836 539">Add local sequences (optional)</p> <p data-bbox="432 562 1305 642">Check for relevant new sequences for list of query species on NCBI (GenBank and RefSeq) (optional)</p> <p data-bbox="432 665 1007 703">Select amplicon region and remove primers</p> <p data-bbox="432 725 986 763">Remove sequences with ambiguous bases</p> <p data-bbox="432 786 501 824">Align</p> <p data-bbox="432 846 1023 884">End of module: Optional check of alignments</p> |
| Module 2 | <p data-bbox="432 913 1075 952">Compare sequence species labels with taxonomy</p> <p data-bbox="432 974 1305 1055">Non-matching labels queried against Catalogue of Life to check for known synonyms</p> <p data-bbox="432 1077 1278 1158">Remaining mismatches kept if genus already exists in taxonomy, otherwise flagged for removal</p> <p data-bbox="432 1180 1161 1218">End of module: Optional check of flagged species labels</p>                                                                                                                                                                                                                                                                              |
| Module 3 | <p data-bbox="432 1240 783 1279">Discard flagged sequences</p> <p data-bbox="432 1301 1270 1382">Update taxonomy key file for sequences found to be incorrectly labelled in Module 2</p> <p data-bbox="432 1404 587 1442">Run SATIVA</p> <p data-bbox="432 1464 1315 1503">End of module: Optional check of putatively mislabelled sequences</p>                                                                                                                                                                                                                                                                                                                                                                       |
| Module 4 | <p data-bbox="432 1525 783 1563">Discard flagged sequences</p> <p data-bbox="432 1585 1283 1666">Finalise consensus taxonomy and relabel sequences with correct species label and accession number</p> <p data-bbox="432 1688 1251 1727">Select one representative sequence per haplotype per species</p>                                                                                                                                                                                                                                                                                                                                                                                                              |

899 **Table 3:** GNU core utilities and other lightweight tools used for manipulation of text and  
 900 sequence files

| TOOL                                      | FUNCTION                               | SOURCE                                                                                          |
|-------------------------------------------|----------------------------------------|-------------------------------------------------------------------------------------------------|
| awk, cut, grep,<br>join, sed, sort,<br>tr | Processing text files                  | GNU core utilities                                                                              |
| seqbuddy                                  | Processing FASTA/Q files               | <a href="https://github.com/biologyguy/BuddySuite">https://github.com/biologyguy/BuddySuite</a> |
| seqkit                                    | Processing FASTA/Q files               | <a href="https://github.com/shenwei356/seqkit">https://github.com/shenwei356/seqkit</a>         |
| seqtk                                     | Processing FASTA/Q files               | <a href="https://github.com/lh3/seqtk">https://github.com/lh3/seqtk</a>                         |
| tabtk                                     | Processing tab-delimited<br>text files | <a href="https://github.com/lh3/tabtk">https://github.com/lh3/tabtk</a>                         |

901



16  
17  
18  
19  
20  
21  
22  
23  
24  
25  
26  
27  
28  
29  
30  
31  
32  
33  
34  
35  
36  
37  
38  
39  
40  
41  
42  
43  
44  
45  
46  
47  
48  
49  
50  
51  
52  
53  
54  
55  
56  
57  
58  
59  
60  
61  
62  
63  
64  
65

902 **Table 4:** Number of reads per sequencing run and the numbers of reads with matching, non-matching or unidentifiable tags for seven of the  
903 eight sequencing runs\*.

|                 | <b>total</b> | <b>matching</b> | <b>non-matching</b> |                      | <b>matching</b> | <b>non-matching</b> |                      | <b>erroneous</b> |                      |
|-----------------|--------------|-----------------|---------------------|----------------------|-----------------|---------------------|----------------------|------------------|----------------------|
|                 | <b>reads</b> | <b>tag 2</b>    | <b>tag 2</b>        | <b>%<sup>1</sup></b> | <b>tag 1</b>    | <b>tag 1</b>        | <b>%<sup>2</sup></b> | <b>tag 1</b>     | <b>%<sup>2</sup></b> |
|                 |              | <b>reads</b>    | <b>reads</b>        |                      | <b>reads</b>    | <b>reads</b>        |                      | <b>reads</b>     |                      |
| <b>SeqRun01</b> | 18,438,517   | 18,102,702      | 282,419             | 1.5                  | 17,514,515      | 451,028             | 2.5                  | 137,159          | 0.8                  |
| <b>SeqRun02</b> | 25,385,558   | 24,596,380      | 626,245             | 2.5                  | 23,426,084      | 612,045             | 2.5                  | 558,251          | 2.3                  |
| <b>SeqRun03</b> | 14,875,796   | 14,393,884      | 343,528             | 2.3                  | 13,766,187      | 426,181             | 3.0                  | 201,516          | 1.4                  |
| <b>SeqRun04</b> | 2,027,794    | 1,935,149       | 56,077              | 2.8                  | 1,806,655       | 88,307              | 4.6                  | 40,187           | 2.1                  |
| <b>SeqRun05</b> | 18,221,504   | 17,500,366      | 421,588             | 2.3                  | 16,793,851      | 482,365             | 2.8                  | 161,458          | 0.9                  |
| <b>SeqRun06</b> | 20,718,202   | 19,874,913      | 429,048             | 2.1                  | 19,317,305      | 371,048             | 1.9                  | 81,422           | 0.4                  |
| <b>SeqRun07</b> | 24,604,610   | 23,746,938      | 663,730             | 2.7                  | 22,446,187      | 497,366             | 2.1                  | 803,385          | 3.4                  |
| <b>Total</b>    | 124,271,981  | 120,150,332     | 2,822,635           | 2.3                  | 115,070,784     | 2,928,340           | 2,5                  | 1,983,378        | 1,7                  |
| <b>IndexRun</b> | 10,276,093   | 10,116,808      | NA                  | NA                   | 5,841,190       | 4,186,688           | 41.4                 | 88,930           | 0.9                  |

<sup>1</sup> refers to total reads  
<sup>2</sup> refers to matching tag 2

904 \*Sequencing run SeqRun08 run contained libraries of another project, thus we were unable to provide a number of raw reads.

905 **Table 5:** Number of accepted species assignments with two different acceptance criteria the  
 906 more stringent criterion accepting only assignments occurring in both *extraction replicates*  
 907 (A & B), and the more lax criterion accepting assignment two or more positives in any of the  
 908 twelve *PCR replicates*.

|                                   | <b>stringent</b> | <b>lax</b> | <b>change</b> |
|-----------------------------------|------------------|------------|---------------|
| <i>Aonyx cinereus</i>             | 1                | 1          | 0             |
| <i>Arctictis binturong</i>        | 1                | 1          | 0             |
| <i>Bos Javanicus</i>              | 9                | 11         | +2            |
| <i>Echinosorex gymnura</i>        | 5                | 6          | +1            |
| <i>Felis catus</i>                | 2                | 2          | 0             |
| <i>Helarctos malayanus</i>        | 5                | 6          | +1            |
| <i>Hemigalus derbyanus</i>        | 3                | 3          | 0             |
| <i>Hystrix brachyura</i>          | 4                | 5          | +1            |
| <i>Kalophrynus pleurostigma</i>   | 1                | 1          | 0             |
| <i>Macaca fascicularis</i>        |                  | 1          | +1            |
| <i>Macaca nemestrina</i>          | 1                | 2          | +1            |
| <i>Macaca sp.</i>                 |                  | 3          | +3            |
| <i>Manis javanicus</i>            | 2                | 2          | 0             |
| <i>Muntiacus atherodes</i>        | 6                | 6          | 0             |
| <i>Muntiacus muntjak</i>          | 2                | 2          | 0             |
| <i>Muntiacus sp.</i>              | 10               | 10         | 0             |
| <i>Mydaus javanensis</i>          |                  | 2          | +2            |
| <i>Pongo pygmaeus</i>             | 5                | 5          | 0             |
| <i>Rusa unicolor</i>              | 59               | 67         | +8            |
| <i>Sus barbatus</i>               | 17               | 22         | +5            |
| <i>Tragulus javanicus</i>         | 4                | 6          | +2            |
| <i>Tragulus napu</i>              | 10               | 11         | +1            |
| <i>Trichys fasciculata</i>        | 5                | 5          | 0             |
| <i>Viverra zangara</i>            | 11               | 11         | 0             |
| <b>total accepted assignments</b> | <b>162</b>       | <b>190</b> | <b>+28</b>    |

909

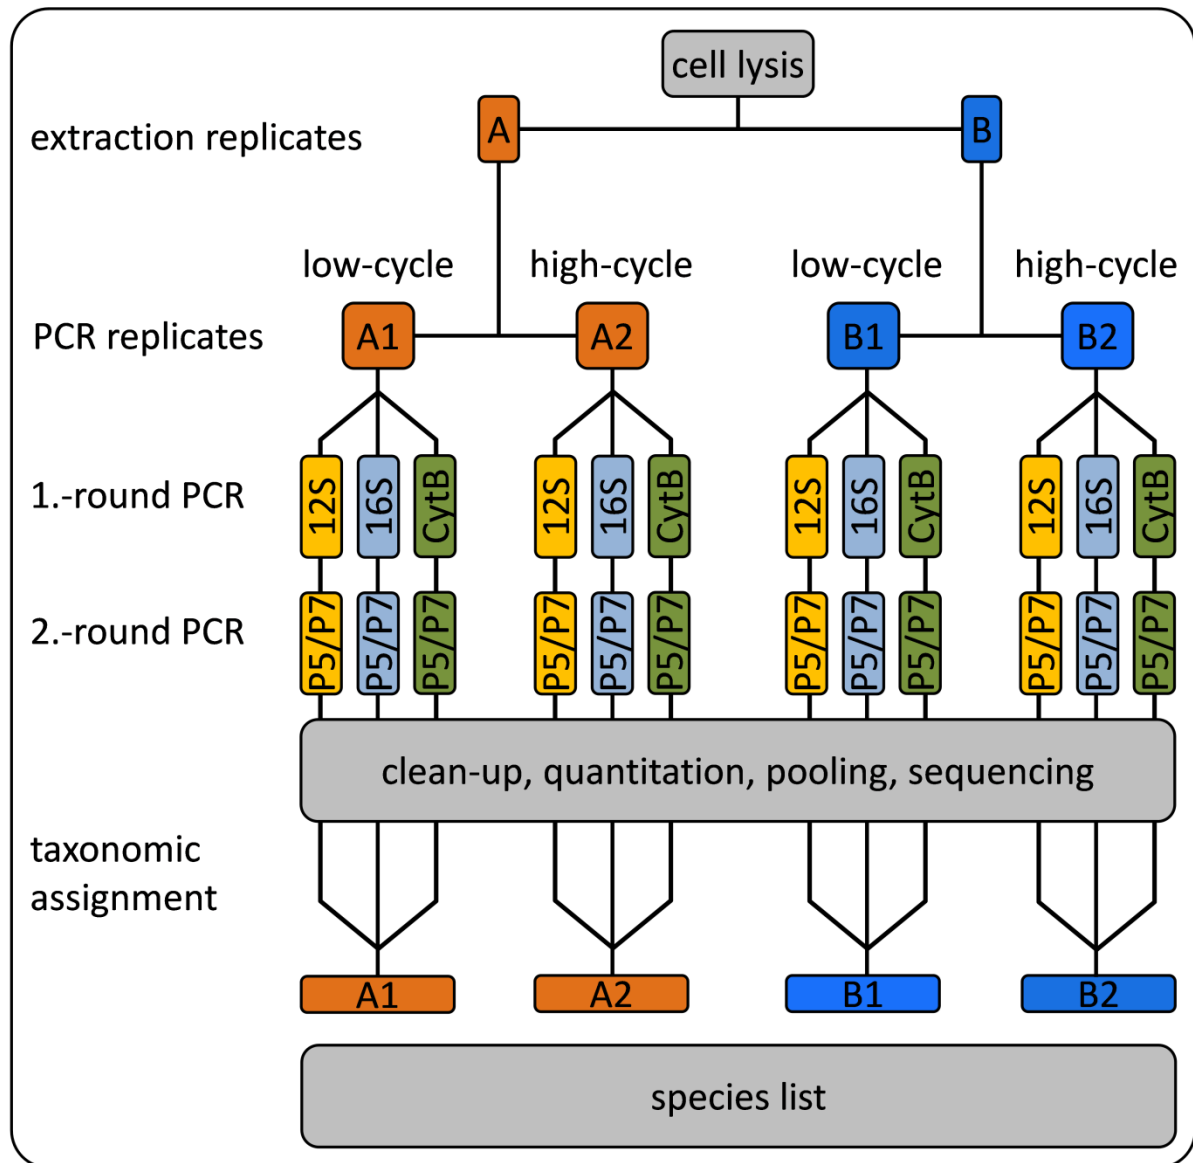

**Figure 1:** laboratory scheme; during DNA extraction the sample is split into two extraction replicates A & B. Our Protocol consists of two rounds of PCR that were the sample tags, the necessary sequencing primer and sequencing adapters are added to the the amplicons. For each extraction replicate we ran a low cycle PCR and a high cycle PCR for each marker that we have twelve independent PCR replicates per sample. All PCR products were sequenced and the obtained reads were taxonomically identified with PROTAX.

## 1.-round PCR

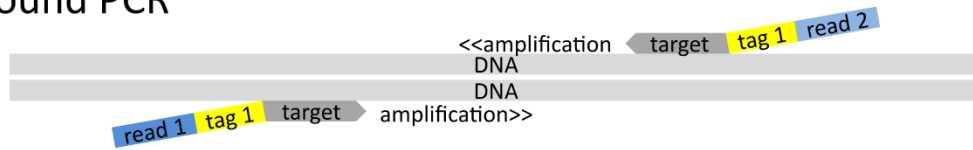

## 1.-round product:

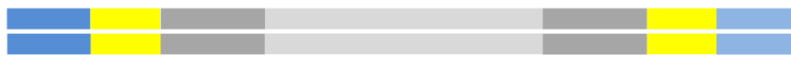

## 2.-round PCR

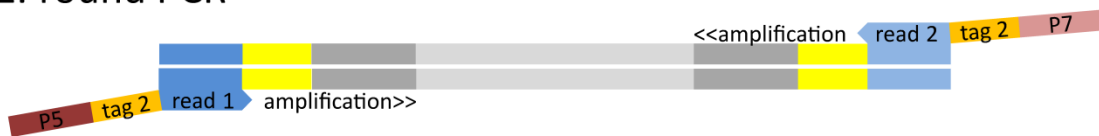

## 2.-round product:

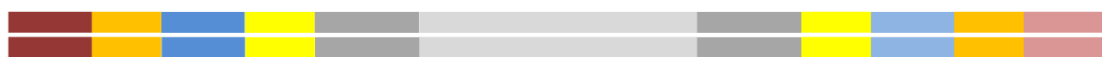

**Figure 2:** Scheme to build double 'twin-tagged' PCR libraries. The first round of PCR uses target-specific primers (*12S*, *16S*, or *CytB*, dark grey) that have both been extended with the same (i.e. 'twin') sample-identifying *tag* sequences *tag 1* (yellow) and then with the different *read 1* (dark blue) and *read 2* (light blue) sequence primers. The second round of PCR uses the priming sites of the *read 1* and *read 2* sequencing primers to add twin plate-identifying *tag* sequences *tag 2* (orange) and the P5 (dark red) and P7 (light red) Illumina adapters.

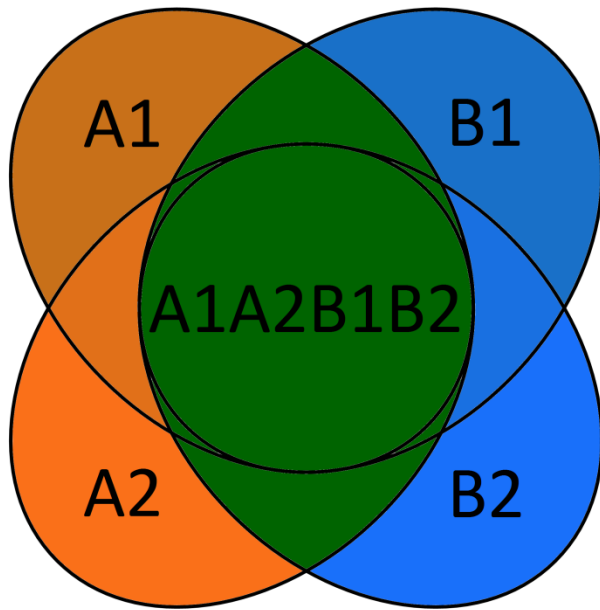

1  
2  
3  
4  
5  
6  
7  
8  
9  
10  
11  
12  
13  
14  
15  
16  
17  
18  
19  
20  
21 926 **Figure 3:** For the stringent acceptance criterion we only accepted taxonomic assignments  
22 927 that were positively detected in both *extraction replicates* A and B (green colour). The  
23 928 numbers (1 & 2) refer to the two PCR replicates for each extraction replicate.  
24  
25 929

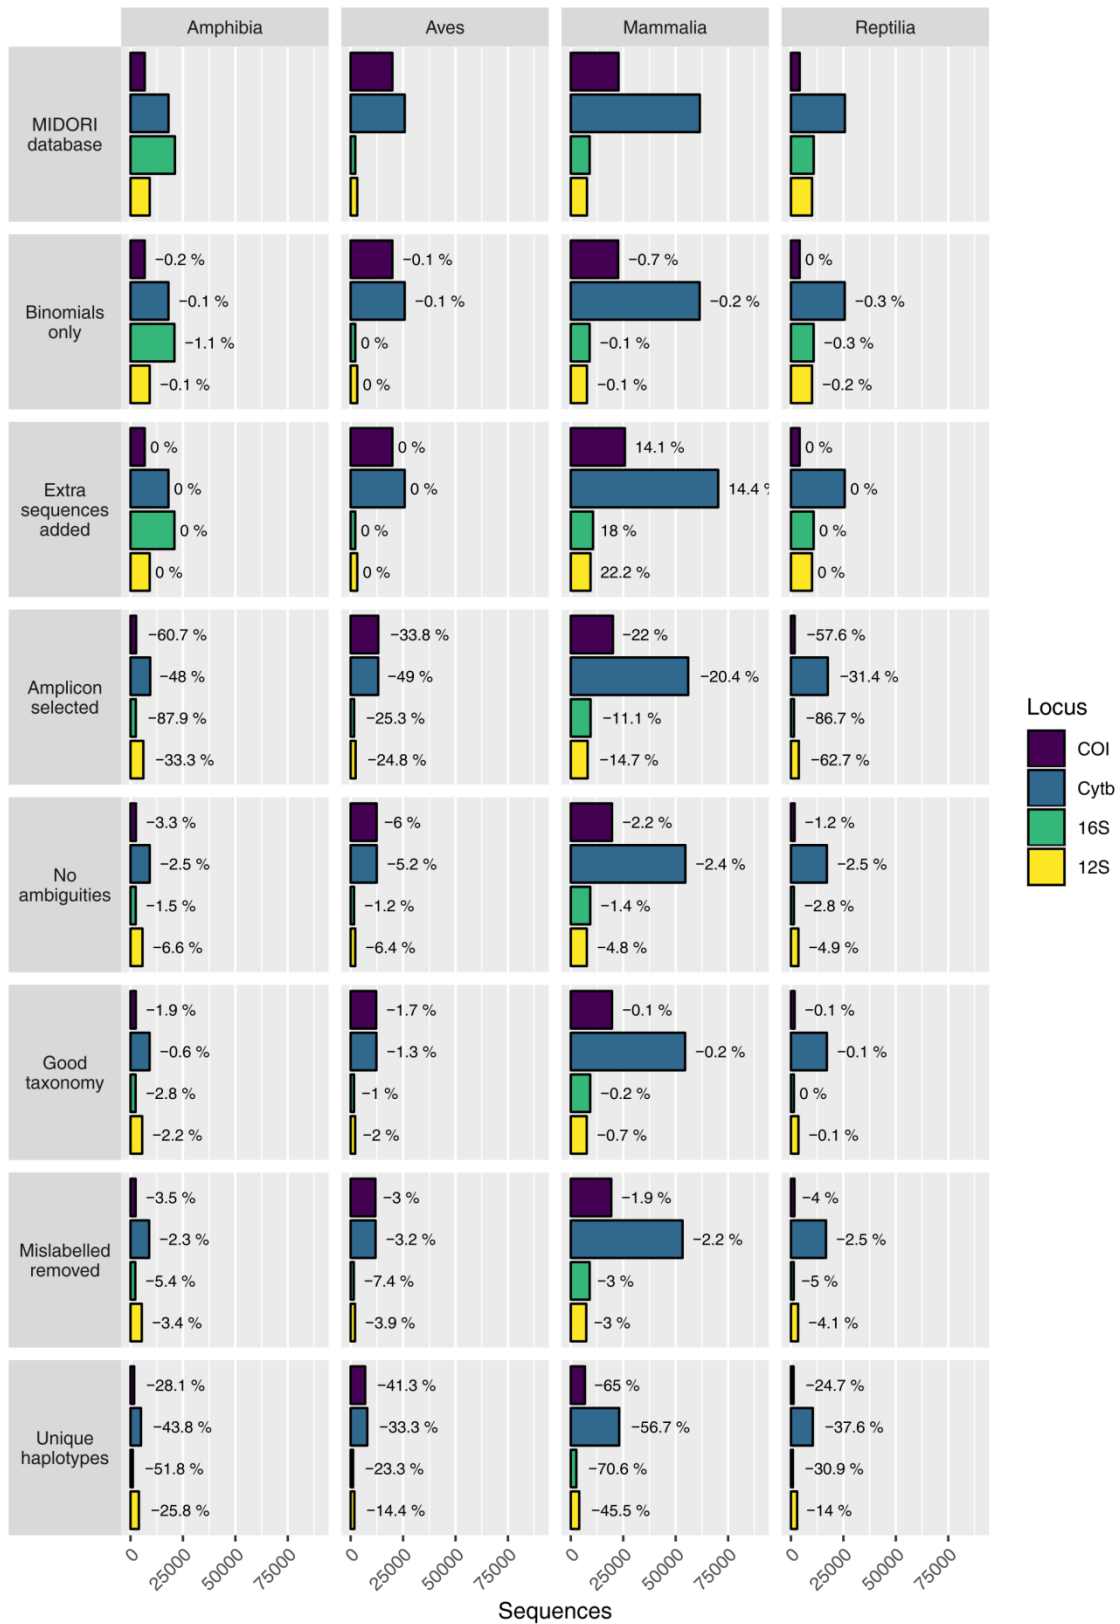

**Figure 4:** Data availability and percentage loss at each major step in the database curation procedure for each target amplicon and class of Tetrapoda. The number of sequences decreases between steps except “Extra sequences added” where additional target sequences are included for Mammalia and there is no change for the other three classes.

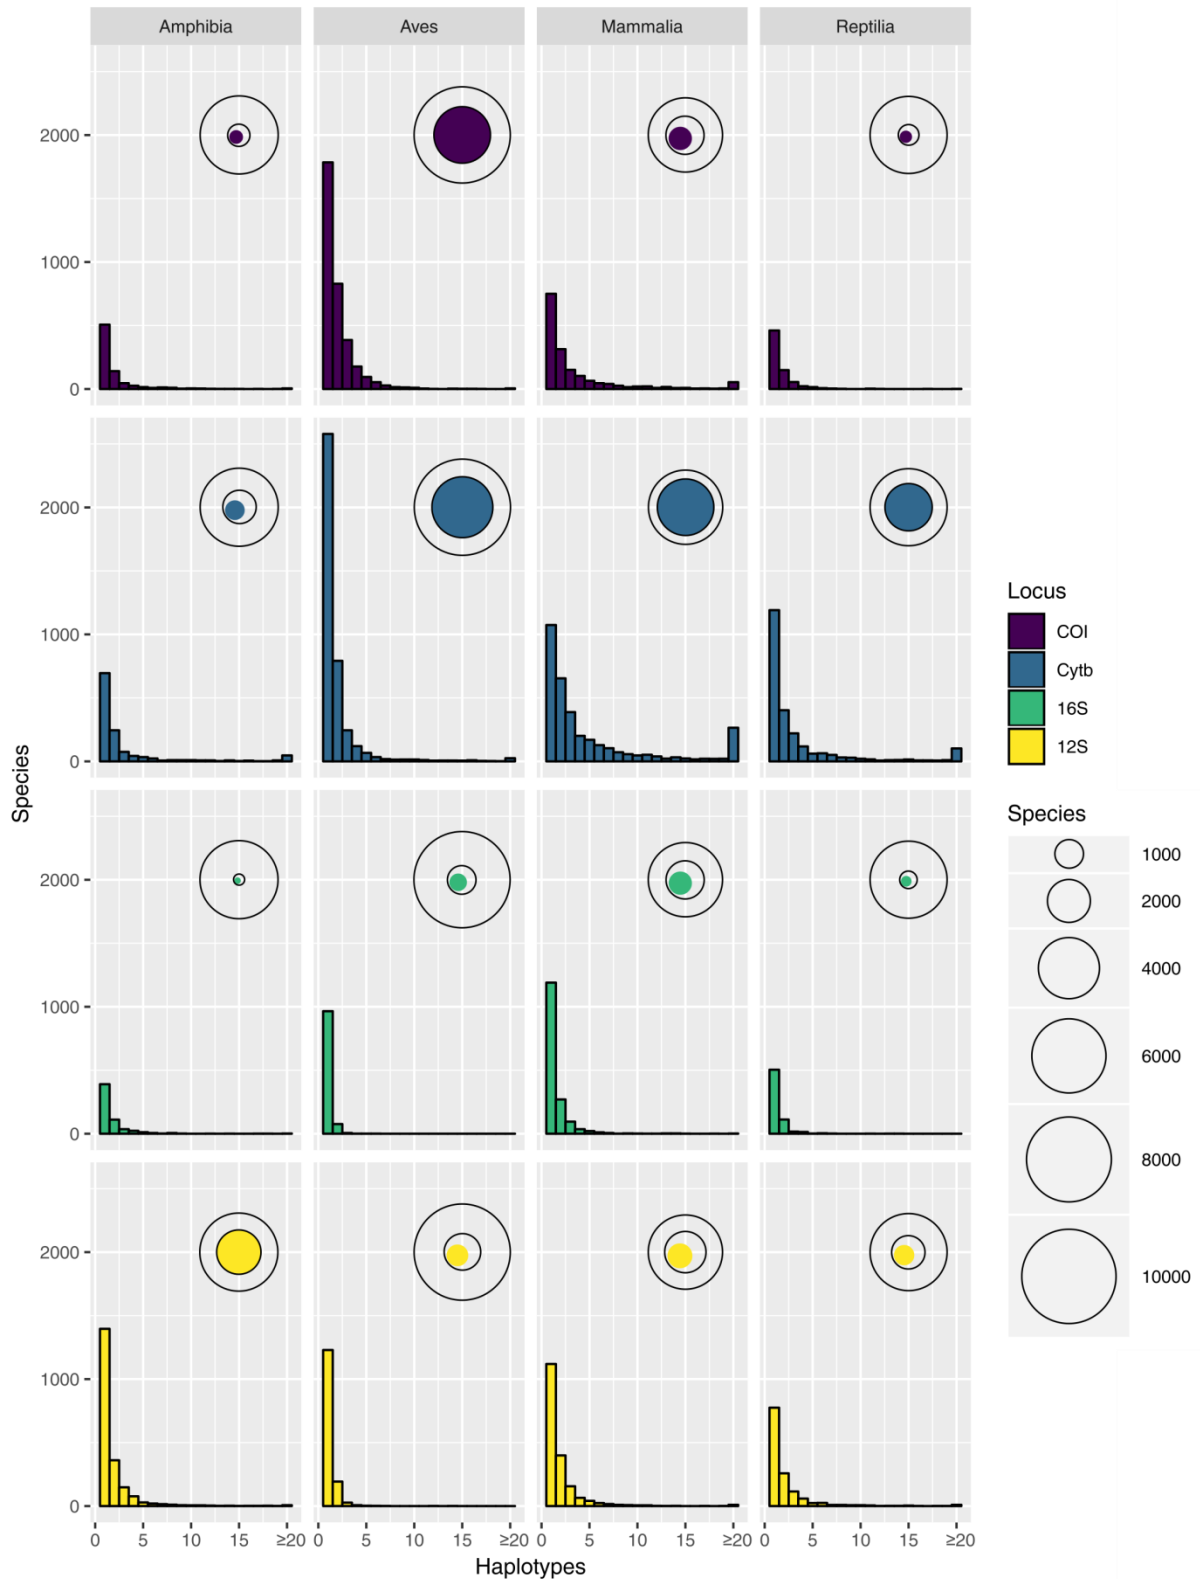

**Figure 5:** Haplotype number by species (frequency distribution) and the total number of species with at least one haplotype, shown relative to the total number of species in the taxonomy for that category (bubbles), shown for each marker and class of Tetrapoda. The proportion of species covered by the database varies between categories but in all cases a majority of recovered species are represented by a single unique haplotype.

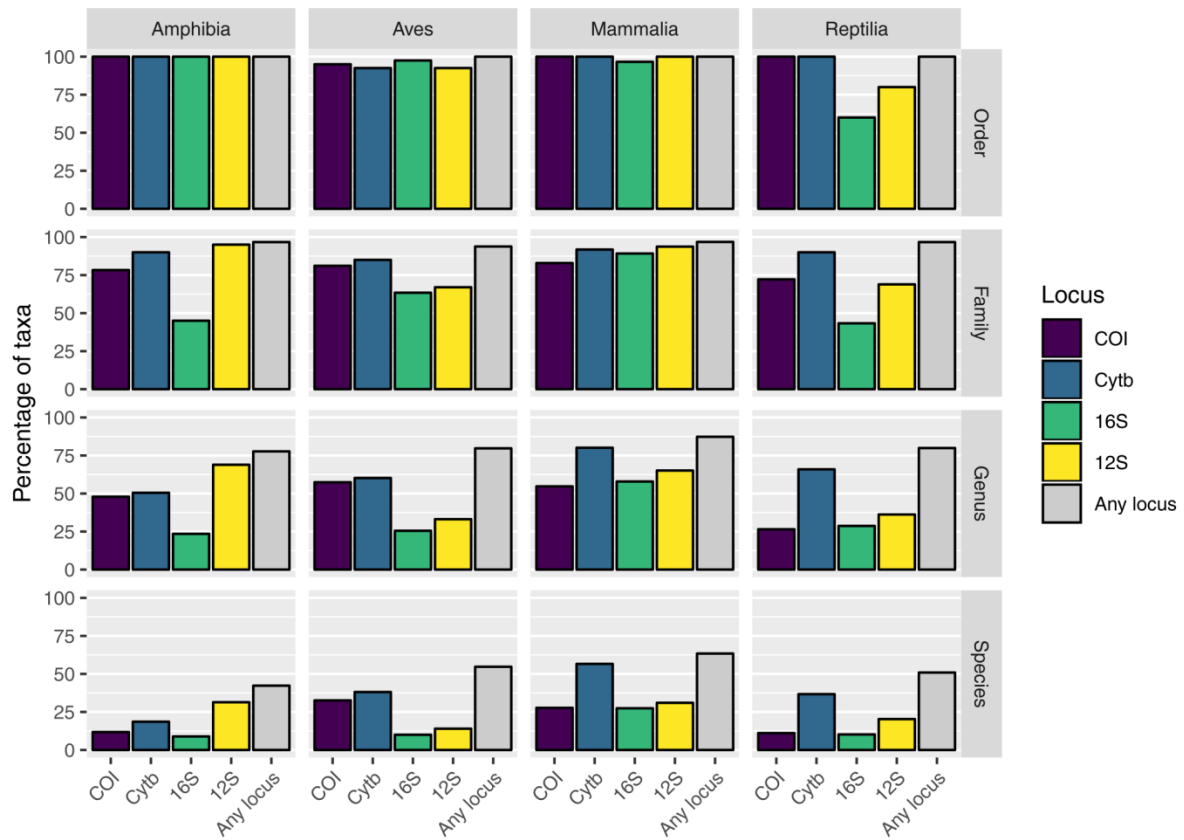

**Figure 6:** The percentage of the full taxonomy covered by the final database at each taxonomic level for each class of Tetrapoda. Includes the percentage of taxa represented by each marker and all markers combined. In all cases taking all four markers together increases the proportion of species, genera and families covered by the database, but it remains incomplete when compared with the full taxonomy.



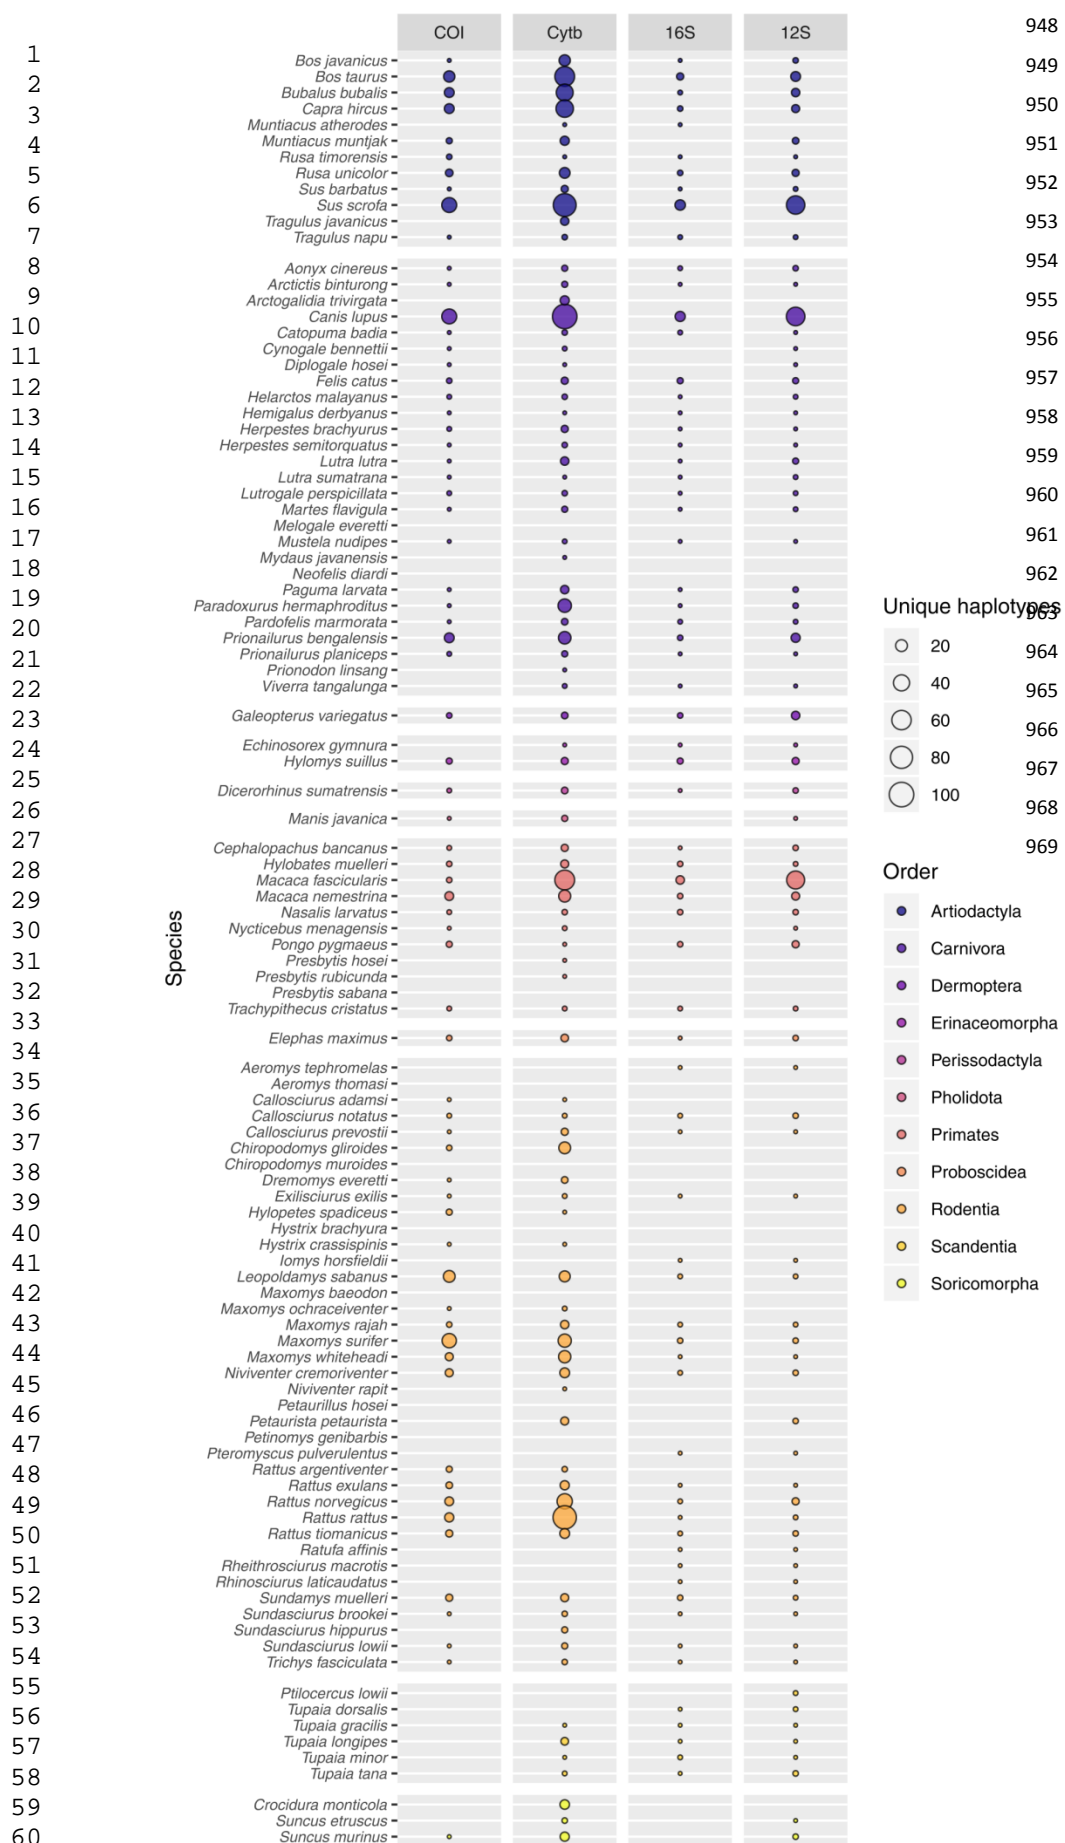

**Figure 7:** The number of unique haplotypes per marker for each of the 103 mammal species expected in the study area. Bubble size is proportional to the number of haplotypes and varies between 0 and 100. Only 55 species have at least one sequence per marker and nine species are completely unrepresented in the current database.

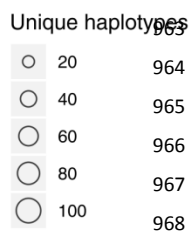

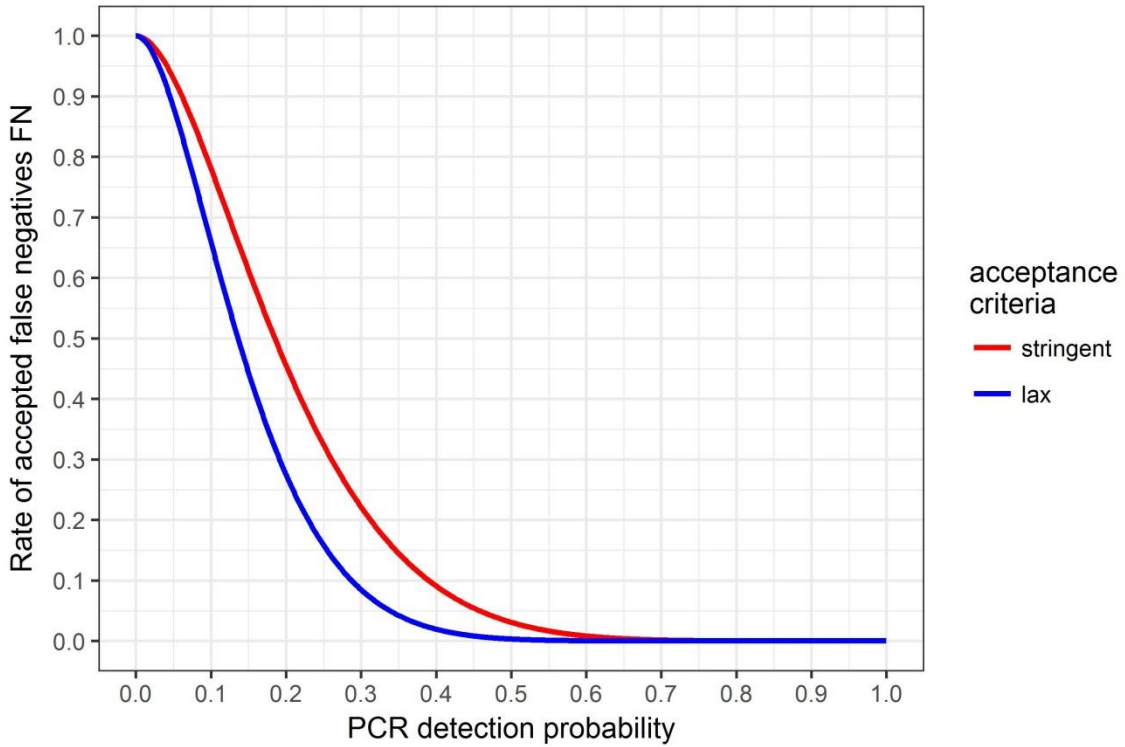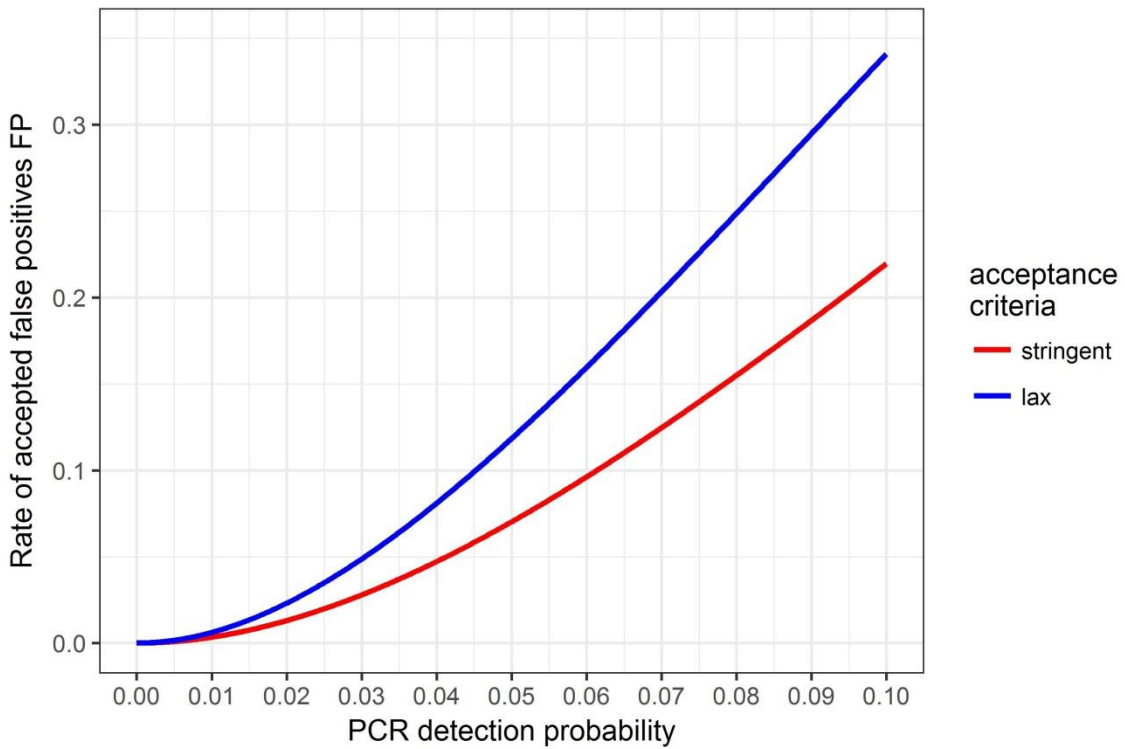

**Supplemental Figure 1:** The rates of accepted false negatives (upper graph) and false positives (lower graph) for both our used acceptance criteria for varying PCR detection probabilities. The red line always denotes the stringent acceptance criterion that a positive is only accepted if it is present in at least one A and one B replicate. The lax criterion (blue) accepted at any two positives out of the twelve replicates. The stringent criterion poses a higher risk of accepting a false negative but it reduces clearly the risk of false positives, especially with increasing detection probability due to higher risk of contamination.

**Supplemental table 1: Complete list of all used primer sequences in 5'-3' direction.**

| primer name | primer sequence                                                                 | direction | primer length [bp] |
|-------------|---------------------------------------------------------------------------------|-----------|--------------------|
| 12SfA       | ACACTCTTTCCCTACACGACGCTCTTCCGATCTTGCATAAAAAAGCTT<br>CAAAC TGGGATTAGATACCCCACTAT | forward   | 73                 |
| 12SfB       | ACACTCTTTCCCTACACGACGCTCTTCCGATCTTCAGCAAAAAAGCTT<br>CAAAC TGGGATTAGATACCCCACTAT | forward   | 73                 |
| 12SfC       | ACACTCTTTCCCTACACGACGCTCTTCCGATCTAAGCGAAAAAGCTT<br>CAAAC TGGGATTAGATACCCCACTAT  | forward   | 73                 |
| 12SfD       | ACACTCTTTCCCTACACGACGCTCTTCCGATCTACAAGAAAAAGCTT<br>CAAAC TGGGATTAGATACCCCACTAT  | forward   | 73                 |
| 12SfE       | ACACTCTTTCCCTACACGACGCTCTTCCGATCTAGTGAAAAAGCTT<br>CAAAC TGGGATTAGATACCCCACTAT   | forward   | 73                 |
| 12SfF       | ACACTCTTTCCCTACACGACGCTCTTCCGATCTTGACAAAAAGCTT<br>CAAAC TGGGATTAGATACCCCACTAT   | forward   | 73                 |
| 12SfG       | ACACTCTTTCCCTACACGACGCTCTTCCGATCTCCTATAAAAAAGCTT<br>CAAAC TGGGATTAGATACCCCACTAT | forward   | 73                 |
| 12SfH       | ACACTCTTTCCCTACACGACGCTCTTCCGATCTGGATGAAAAAGCTT<br>CAAAC TGGGATTAGATACCCCACTAT  | forward   | 73                 |
| 12SfI       | ACACTCTTTCCCTACACGACGCTCTTCCGATCTTAGGAAAAAGCTT<br>CAAAC TGGGATTAGATACCCCACTAT   | forward   | 73                 |
| 12SfK       | ACACTCTTTCCCTACACGACGCTCTTCCGATCTCACCTAAAAAGCTT<br>CAAAC TGGGATTAGATACCCCACTAT  | forward   | 73                 |
| 12SfL       | ACACTCTTTCCCTACACGACGCTCTTCCGATCTGTCAAAAAAGCTT<br>CAAAC TGGGATTAGATACCCCACTAT   | forward   | 73                 |
| 12SfM       | ACACTCTTTCCCTACACGACGCTCTTCCGATCTGAAGTAAAAAGCTT<br>CAAAC TGGGATTAGATACCCCACTAT  | forward   | 73                 |
| 12SfN       | ACACTCTTTCCCTACACGACGCTCTTCCGATCTCGGTAAAAAGCTT<br>CAAAC TGGGATTAGATACCCCACTAT   | forward   | 73                 |
| 12SfO       | ACACTCTTTCCCTACACGACGCTCTTCCGATCTACCGAAAAAGCTT<br>CAAAC TGGGATTAGATACCCCACTAT   | forward   | 73                 |
| 12SfP       | ACACTCTTTCCCTACACGACGCTCTTCCGATCTACGTCAAAAAAGCTT<br>CAAAC TGGGATTAGATACCCCACTAT | forward   | 73                 |
| 12SfQ       | ACACTCTTTCCCTACACGACGCTCTTCCGATCTAGACTAAAAAGCTT<br>CAAAC TGGGATTAGATACCCCACTAT  | forward   | 73                 |
| 12SfR       | ACACTCTTTCCCTACACGACGCTCTTCCGATCTAGGAAAAAGCTT<br>CAAAC TGGGATTAGATACCCCACTAT    | forward   | 73                 |
| 12SfS       | ACACTCTTTCCCTACACGACGCTCTTCCGATCTATTCCAAAAAGCTT<br>CAAAC TGGGATTAGATACCCCACTAT  | forward   | 73                 |
| 12SfT       | ACACTCTTTCCCTACACGACGCTCTTCCGATCTCAATCAAAAAAGCTT<br>CAAAC TGGGATTAGATACCCCACTAT | forward   | 73                 |
| 12SfW       | ACACTCTTTCCCTACACGACGCTCTTCCGATCTCCACAAAAAGCTT<br>CAAAC TGGGATTAGATACCCCACTAT   | forward   | 73                 |
| 12SfX       | ACACTCTTTCCCTACACGACGCTCTTCCGATCTGCTTAAAAAGCTT<br>CAAAC TGGGATTAGATACCCCACTAT   | forward   | 73                 |
| 12SfY       | ACACTCTTTCCCTACACGACGCTCTTCCGATCTGGTACAAAAAGCTT<br>CAAAC TGGGATTAGATACCCCACTAT  | forward   | 73                 |

| primer name | primer sequence                                                                | direction | primer length [bp] |
|-------------|--------------------------------------------------------------------------------|-----------|--------------------|
| 12SfZ       | ACACTCTTTCCCTACACGACGCTCTTCCGATCTAACACAAAAAGCTT<br>CAAACCTGGGATTAGATACCCCACTAT | forward   | 73                 |
| 12Sfctr     | ACACTCTTTCCCTACACGACGCTCTTCCGATCTATCTGAAAAAGCTT<br>CAAACCTGGGATTAGATACCCCACTAT | forward   | 73                 |
| 12SrA       | GTGACTGGAGTTCAGACGTGTGCTCTTCCGATCTTGCATTGACTGCA<br>GAGGGTGACGGGCGGTGTGT        | reverse   | 67                 |
| 12SrB       | GTGACTGGAGTTCAGACGTGTGCTCTTCCGATCTTCAGCTGACTGCA<br>GAGGGTGACGGGCGGTGTGT        | reverse   | 67                 |
| 12SrC       | GTGACTGGAGTTCAGACGTGTGCTCTTCCGATCTAAGCGTGACTGCA<br>GAGGGTGACGGGCGGTGTGT        | reverse   | 67                 |
| 12SrD       | GTGACTGGAGTTCAGACGTGTGCTCTTCCGATCTACAAGTGACTGCA<br>GAGGGTGACGGGCGGTGTGT        | reverse   | 67                 |
| 12SrE       | GTGACTGGAGTTCAGACGTGTGCTCTTCCGATCTAGTGGTGACTGCA<br>GAGGGTGACGGGCGGTGTGT        | reverse   | 67                 |
| 12SrF       | GTGACTGGAGTTCAGACGTGTGCTCTTCCGATCTTTGACTGACTGCA<br>GAGGGTGACGGGCGGTGTGT        | reverse   | 67                 |
| 12SrG       | GTGACTGGAGTTCAGACGTGTGCTCTTCCGATCTCCTATTGACTGCA<br>GAGGGTGACGGGCGGTGTGT        | reverse   | 67                 |
| 12SrH       | GTGACTGGAGTTCAGACGTGTGCTCTTCCGATCTGGATGTGACTGCA<br>GAGGGTGACGGGCGGTGTGT        | reverse   | 67                 |
| 12SrI       | GTGACTGGAGTTCAGACGTGTGCTCTTCCGATCTCTAGGTGACTGCA<br>GAGGGTGACGGGCGGTGTGT        | reverse   | 67                 |
| 12SrK       | GTGACTGGAGTTCAGACGTGTGCTCTTCCGATCTCACCTTGACTGCA<br>GAGGGTGACGGGCGGTGTGT        | reverse   | 67                 |
| 12SrL       | GTGACTGGAGTTCAGACGTGTGCTCTTCCGATCTGTCAATGACTGCA<br>GAGGGTGACGGGCGGTGTGT        | reverse   | 67                 |
| 12SrM       | GTGACTGGAGTTCAGACGTGTGCTCTTCCGATCTGAAGTTGACTGCA<br>GAGGGTGACGGGCGGTGTGT        | reverse   | 67                 |
| 12SrN       | GTGACTGGAGTTCAGACGTGTGCTCTTCCGATCTCGGTTTGACTGCA<br>GAGGGTGACGGGCGGTGTGT        | reverse   | 67                 |
| 12SrO       | GTGACTGGAGTTCAGACGTGTGCTCTTCCGATCTACCGATGACTGCA<br>GAGGGTGACGGGCGGTGTGT        | reverse   | 67                 |
| 12SrP       | GTGACTGGAGTTCAGACGTGTGCTCTTCCGATCTACGTCTGACTGCA<br>GAGGGTGACGGGCGGTGTGT        | reverse   | 67                 |
| 12SrR       | GTGACTGGAGTTCAGACGTGTGCTCTTCCGATCTAGGAATGACTGCA<br>GAGGGTGACGGGCGGTGTGT        | reverse   | 67                 |
| 12SrS       | GTGACTGGAGTTCAGACGTGTGCTCTTCCGATCTATTCCCTGACTGCA<br>GAGGGTGACGGGCGGTGTGT       | reverse   | 67                 |
| 12SrT       | GTGACTGGAGTTCAGACGTGTGCTCTTCCGATCTCAATCTGACTGCA<br>GAGGGTGACGGGCGGTGTGT        | reverse   | 67                 |
| 12SrV       | GTGACTGGAGTTCAGACGTGTGCTCTTCCGATCTCATGATGACTGCA<br>GAGGGTGACGGGCGGTGTGT        | reverse   | 67                 |
| 12SrW       | GTGACTGGAGTTCAGACGTGTGCTCTTCCGATCTCCACATGACTGCA<br>GAGGGTGACGGGCGGTGTGT        | reverse   | 67                 |

| primer name | primer sequence                                                         | direction | primer length [bp] |
|-------------|-------------------------------------------------------------------------|-----------|--------------------|
| 12SrX       | GTGACTGGAGTTCAGACGTGTGCTCTTCCGATCTGCTTATGACTGCA<br>GAGGGTGACGGGCGGTGTGT | reverse   | 67                 |
| 12SrY       | GTGACTGGAGTTCAGACGTGTGCTCTTCCGATCTGGTACTGACTGCA<br>GAGGGTGACGGGCGGTGTGT | reverse   | 67                 |
| 12SrZ       | GTGACTGGAGTTCAGACGTGTGCTCTTCCGATCTAACACTGACTGCA<br>GAGGGTGACGGGCGGTGTGT | reverse   | 67                 |
| 12Srctr     | GTGACTGGAGTTCAGACGTGTGCTCTTCCGATCTATCTGTGACTGCA<br>GAGGGTGACGGGCGGTGTGT | reverse   | 67                 |
| 16SfA       | ACACTCTTTCCCTACACGACGCTCTTCCGATCTTGCATCGGTTGGGG<br>TGACCTCGGA           | forward   | 57                 |
| 16SfB       | ACACTCTTTCCCTACACGACGCTCTTCCGATCTTCAGCCGGTTGGGG<br>TGACCTCGGA           | forward   | 57                 |
| 16SfC       | ACACTCTTTCCCTACACGACGCTCTTCCGATCTAAGCGCGGTTGGGG<br>TGACCTCGGA           | forward   | 57                 |
| 16SfD       | ACACTCTTTCCCTACACGACGCTCTTCCGATCTACAAGCGGTTGGGG<br>TGACCTCGGA           | forward   | 57                 |
| 16SfE       | ACACTCTTTCCCTACACGACGCTCTTCCGATCTAGTGGCGGTTGGGG<br>TGACCTCGGA           | forward   | 57                 |
| 16SfF       | ACACTCTTTCCCTACACGACGCTCTTCCGATCTTGACCGGTTGGGG<br>TGACCTCGGA            | forward   | 57                 |
| 16SfG       | ACACTCTTTCCCTACACGACGCTCTTCCGATCTCCTATCGGTTGGGG<br>TGACCTCGGA           | forward   | 57                 |
| 16SfH       | ACACTCTTTCCCTACACGACGCTCTTCCGATCTGGATGCGGTTGGGG<br>TGACCTCGGA           | forward   | 57                 |
| 16SfI       | ACACTCTTTCCCTACACGACGCTCTTCCGATCTTAGGCGGTTGGGG<br>TGACCTCGGA            | forward   | 57                 |
| 16SfK       | ACACTCTTTCCCTACACGACGCTCTTCCGATCTCACCTCGGTTGGGG<br>TGACCTCGGA           | forward   | 57                 |
| 16SfL       | ACACTCTTTCCCTACACGACGCTCTTCCGATCTGTCAACGGTTGGGG<br>TGACCTCGGA           | forward   | 57                 |
| 16SfN       | ACACTCTTTCCCTACACGACGCTCTTCCGATCTCGGTTGCGGTTGGGG<br>TGACCTCGGA          | forward   | 57                 |
| 16SfO       | ACACTCTTTCCCTACACGACGCTCTTCCGATCTACCGACGGTTGGGG<br>TGACCTCGGA           | forward   | 57                 |
| 16SfP       | ACACTCTTTCCCTACACGACGCTCTTCCGATCTACGTCCGGTTGGGG<br>TGACCTCGGA           | forward   | 57                 |
| 16SfQ       | ACACTCTTTCCCTACACGACGCTCTTCCGATCTAGACTCGGTTGGGG<br>TGACCTCGGA           | forward   | 57                 |
| 16SfR       | ACACTCTTTCCCTACACGACGCTCTTCCGATCTAGGAACGGTTGGGG<br>TGACCTCGGA           | forward   | 57                 |
| 16SfS       | ACACTCTTTCCCTACACGACGCTCTTCCGATCTATCCCGGTTGGGG<br>TGACCTCGGA            | forward   | 57                 |
| 16SfT       | ACACTCTTTCCCTACACGACGCTCTTCCGATCTCAATCCGGTTGGGG<br>TGACCTCGGA           | forward   | 57                 |

| <b>primer name</b> | <b>primer sequence</b>                                           | <b>direction</b> | <b>primer length [bp]</b> |
|--------------------|------------------------------------------------------------------|------------------|---------------------------|
| 16SfV              | ACACTCTTTCCCTACACGACGCTCTTCCGATCTCATGACGGTTGGGG<br>TGACCTCGGA    | forward          | 57                        |
| 16SfW              | ACACTCTTTCCCTACACGACGCTCTTCCGATCTCCACACGGTTGGGG<br>TGACCTCGGA    | forward          | 57                        |
| 16SfX              | ACACTCTTTCCCTACACGACGCTCTTCCGATCTGCTTACGGTTGGGG<br>TGACCTCGGA    | forward          | 57                        |
| 16SfY              | ACACTCTTTCCCTACACGACGCTCTTCCGATCTGGTACCGTTGGGG<br>TGACCTCGGA     | forward          | 57                        |
| 16SfZ              | ACACTCTTTCCCTACACGACGCTCTTCCGATCTAACACCGTTGGGG<br>TGACCTCGGA     | forward          | 57                        |
| 16Sfcrf            | ACACTCTTTCCCTACACGACGCTCTTCCGATCTATCTGCGGTTGGGG<br>TGACCTCGGA    | forward          | 57                        |
| 16SrA              | GTGACTGGAGTTCAGACGTGTGCTCTTCCGATCTTGCATGCTGTTAT<br>CCCTAGGGTAACT | reverse          | 60                        |
| 16SrB              | GTGACTGGAGTTCAGACGTGTGCTCTTCCGATCTTCAGCGCTGTTAT<br>CCCTAGGGTAACT | reverse          | 60                        |
| 16SrC              | GTGACTGGAGTTCAGACGTGTGCTCTTCCGATCTAAGCGGCTGTTAT<br>CCCTAGGGTAACT | reverse          | 60                        |
| 16SrD              | GTGACTGGAGTTCAGACGTGTGCTCTTCCGATCTACAAGGCTGTTAT<br>CCCTAGGGTAACT | reverse          | 60                        |
| 16SrE              | GTGACTGGAGTTCAGACGTGTGCTCTTCCGATCTAGTGGGCTGTTAT<br>CCCTAGGGTAACT | reverse          | 60                        |
| 16SrF              | GTGACTGGAGTTCAGACGTGTGCTCTTCCGATCTTTGACGCTGTTAT<br>CCCTAGGGTAACT | reverse          | 60                        |
| 16SrG              | GTGACTGGAGTTCAGACGTGTGCTCTTCCGATCTCCTATGCTGTTAT<br>CCCTAGGGTAACT | reverse          | 60                        |
| 16SrI              | GTGACTGGAGTTCAGACGTGTGCTCTTCCGATCTCTAGGGCTGTTAT<br>CCCTAGGGTAACT | reverse          | 60                        |
| 16SrK              | GTGACTGGAGTTCAGACGTGTGCTCTTCCGATCTCACCTGCTGTTAT<br>CCCTAGGGTAACT | reverse          | 60                        |
| 16SrL              | GTGACTGGAGTTCAGACGTGTGCTCTTCCGATCTGTCAAGCTGTTAT<br>CCCTAGGGTAACT | reverse          | 60                        |
| 16SrM              | GTGACTGGAGTTCAGACGTGTGCTCTTCCGATCTGAAGTGCTGTTAT<br>CCCTAGGGTAACT | reverse          | 60                        |
| 16SrN              | GTGACTGGAGTTCAGACGTGTGCTCTTCCGATCTCGGTTGCTGTTAT<br>CCCTAGGGTAACT | reverse          | 60                        |
| 16SrO              | GTGACTGGAGTTCAGACGTGTGCTCTTCCGATCTACCGAGCTGTTAT<br>CCCTAGGGTAACT | reverse          | 60                        |
| 16SrP              | GTGACTGGAGTTCAGACGTGTGCTCTTCCGATCTACGTCGCTGTTAT<br>CCCTAGGGTAACT | reverse          | 60                        |
| 16SrQ              | GTGACTGGAGTTCAGACGTGTGCTCTTCCGATCTAGACTGCTGTTAT<br>CCCTAGGGTAACT | reverse          | 60                        |
| 16SrR              | GTGACTGGAGTTCAGACGTGTGCTCTTCCGATCTAGGAAGCTGTTAT<br>CCCTAGGGTAACT | reverse          | 60                        |

| <b>primer name</b> | <b>primer sequence</b>                                                         | <b>direction</b> | <b>primer length [bp]</b> |
|--------------------|--------------------------------------------------------------------------------|------------------|---------------------------|
| 16SrS              | GTGACTGGAGTTCAGACGTGTGCTCTTCCGATCTATTCCGCTGTTAT<br>CCCTAGGGTAACT               | reverse          | 60                        |
| 16SrT              | GTGACTGGAGTTCAGACGTGTGCTCTTCCGATCTCAATCGCTGTTAT<br>CCCTAGGGTAACT               | reverse          | 60                        |
| 16SrV              | GTGACTGGAGTTCAGACGTGTGCTCTTCCGATCTCATGAGCTGTTAT<br>CCCTAGGGTAACT               | reverse          | 60                        |
| 16SrW              | GTGACTGGAGTTCAGACGTGTGCTCTTCCGATCTCCACAGCTGTTAT<br>CCCTAGGGTAACT               | reverse          | 60                        |
| 16SrX              | GTGACTGGAGTTCAGACGTGTGCTCTTCCGATCTGCTTAGCTGTTAT<br>CCCTAGGGTAACT               | reverse          | 60                        |
| 16SrY              | GTGACTGGAGTTCAGACGTGTGCTCTTCCGATCTGGTACGCTGTTAT<br>CCCTAGGGTAACT               | reverse          | 60                        |
| 16SrZ              | GTGACTGGAGTTCAGACGTGTGCTCTTCCGATCTAACACGCTGTTAT<br>CCCTAGGGTAACT               | reverse          | 60                        |
| 16Srctr            | GTGACTGGAGTTCAGACGTGTGCTCTTCCGATCTATCTGGCTGTTAT<br>CCCTAGGGTAACT               | reverse          | 60                        |
| CytBfA             | ACACTCTTTCCCTACACGACGCTCTTCCGATCTTGATAAAAAAGCTT<br>CCATCCAACATCTCAGCATGATGAAA  | forward          | 73                        |
| CytBfB             | ACACTCTTTCCCTACACGACGCTCTTCCGATCTTCAGCAAAAAAGCTT<br>CCATCCAACATCTCAGCATGATGAAA | forward          | 73                        |
| CytBfC             | ACACTCTTTCCCTACACGACGCTCTTCCGATCTAAGCGAAAAAGCTT<br>CCATCCAACATCTCAGCATGATGAAA  | forward          | 73                        |
| CytBfE             | ACACTCTTTCCCTACACGACGCTCTTCCGATCTAGTGGAAAAAGCTT<br>CCATCCAACATCTCAGCATGATGAAA  | forward          | 73                        |
| CytBfF             | ACACTCTTTCCCTACACGACGCTCTTCCGATCTTTGACAAAAAGCTT<br>CCATCCAACATCTCAGCATGATGAAA  | forward          | 73                        |
| CytBfG             | ACACTCTTTCCCTACACGACGCTCTTCCGATCTCCTATAAAAAAGCTT<br>CCATCCAACATCTCAGCATGATGAAA | forward          | 73                        |
| CytBfH             | ACACTCTTTCCCTACACGACGCTCTTCCGATCTGGATGAAAAAGCTT<br>CCATCCAACATCTCAGCATGATGAAA  | forward          | 73                        |
| CytBfI             | ACACTCTTTCCCTACACGACGCTCTTCCGATCTCTAGGAAAAAGCTT<br>CCATCCAACATCTCAGCATGATGAAA  | forward          | 73                        |
| CytBfK             | ACACTCTTTCCCTACACGACGCTCTTCCGATCTCACCTAAAAAGCTT<br>CCATCCAACATCTCAGCATGATGAAA  | forward          | 73                        |
| CytBfL             | ACACTCTTTCCCTACACGACGCTCTTCCGATCTGTCAAAAAAGCTT<br>CCATCCAACATCTCAGCATGATGAAA   | forward          | 73                        |
| CytBfM             | ACACTCTTTCCCTACACGACGCTCTTCCGATCTGAAGTAAAAAGCTT<br>CCATCCAACATCTCAGCATGATGAAA  | forward          | 73                        |
| CytBfN             | ACACTCTTTCCCTACACGACGCTCTTCCGATCTCGGTAAAAAGCTT<br>CCATCCAACATCTCAGCATGATGAAA   | forward          | 73                        |
| CytBfO             | ACACTCTTTCCCTACACGACGCTCTTCCGATCTACCGAAAAAGCTT<br>CCATCCAACATCTCAGCATGATGAAA   | forward          | 73                        |
| CytBfP             | ACACTCTTTCCCTACACGACGCTCTTCCGATCTACGTCAAAAAAGCTT<br>CCATCCAACATCTCAGCATGATGAAA | forward          | 73                        |

| primer name | primer sequence                                                                | direction | primer length [bp] |
|-------------|--------------------------------------------------------------------------------|-----------|--------------------|
| CytBfQ      | ACACTCTTTCCCTACACGACGCTCTTCCGATCTAGACTAAAAAGCTT<br>CCATCCAACATCTCAGCATGATGAAA  | forward   | 73                 |
| CytBfR      | ACACTCTTTCCCTACACGACGCTCTTCCGATCTAGGAAAAAAGCTT<br>CCATCCAACATCTCAGCATGATGAAA   | forward   | 73                 |
| CytBfS      | ACACTCTTTCCCTACACGACGCTCTTCCGATCTATTCCAAAAAGCTT<br>CCATCCAACATCTCAGCATGATGAAA  | forward   | 73                 |
| CytBfT      | ACACTCTTTCCCTACACGACGCTCTTCCGATCTCAATCAAAAAGCTT<br>CCATCCAACATCTCAGCATGATGAAA  | forward   | 73                 |
| CytBfV      | ACACTCTTTCCCTACACGACGCTCTTCCGATCTCATGAAAAAGCTT<br>CCATCCAACATCTCAGCATGATGAAA   | forward   | 73                 |
| CytBfW      | ACACTCTTTCCCTACACGACGCTCTTCCGATCTCCACAAAAAGCTT<br>CCATCCAACATCTCAGCATGATGAAA   | forward   | 73                 |
| CytBfX      | ACACTCTTTCCCTACACGACGCTCTTCCGATCTGCTTAAAAAGCTT<br>CCATCCAACATCTCAGCATGATGAAA   | forward   | 73                 |
| CytBfY      | ACACTCTTTCCCTACACGACGCTCTTCCGATCTGGTACAAAAAGCTT<br>CCATCCAACATCTCAGCATGATGAAA  | forward   | 73                 |
| CytBfZ      | ACACTCTTTCCCTACACGACGCTCTTCCGATCTAACACAAAAAGCTT<br>CCATCCAACATCTCAGCATGATGAAA  | forward   | 73                 |
| CytBrA      | GTGACTGGAGTTCAGACGTGTGCTCTTCCGATCTTGCATAAACTGCA<br>GCCCCCAGAAATGATATTTGTCTCA   | reverse   | 73                 |
| CytBrB      | GTGACTGGAGTTCAGACGTGTGCTCTTCCGATCTTCCAGCAAAGCTGCA<br>GCCCCCAGAAATGATATTTGTCTCA | reverse   | 73                 |
| CytBrC      | GTGACTGGAGTTCAGACGTGTGCTCTTCCGATCTAAGCGAAAGCTGCA<br>GCCCCCAGAAATGATATTTGTCTCA  | reverse   | 73                 |
| CytBrD      | GTGACTGGAGTTCAGACGTGTGCTCTTCCGATCTACAAGAAAGCTGCA<br>GCCCCCAGAAATGATATTTGTCTCA  | reverse   | 73                 |
| CytBrE      | GTGACTGGAGTTCAGACGTGTGCTCTTCCGATCTAGTGGAAAGCTGCA<br>GCCCCCAGAAATGATATTTGTCTCA  | reverse   | 73                 |
| CytBrF      | GTGACTGGAGTTCAGACGTGTGCTCTTCCGATCTTTGACAAAGCTGCA<br>GCCCCCAGAAATGATATTTGTCTCA  | reverse   | 73                 |
| CytBrG      | GTGACTGGAGTTCAGACGTGTGCTCTTCCGATCTCCTATAAAAGCTGCA<br>GCCCCCAGAAATGATATTTGTCTCA | reverse   | 73                 |
| CytBrH      | GTGACTGGAGTTCAGACGTGTGCTCTTCCGATCTGGATGAAAGCTGCA<br>GCCCCCAGAAATGATATTTGTCTCA  | reverse   | 73                 |
| CytBrI      | GTGACTGGAGTTCAGACGTGTGCTCTTCCGATCTCTAGGAAAGCTGCA<br>GCCCCCAGAAATGATATTTGTCTCA  | reverse   | 73                 |
| CytBrK      | GTGACTGGAGTTCAGACGTGTGCTCTTCCGATCTCACCTAAAGCTGCA<br>GCCCCCAGAAATGATATTTGTCTCA  | reverse   | 73                 |
| CytBrL      | GTGACTGGAGTTCAGACGTGTGCTCTTCCGATCTGTCAAAAAAGCTGCA<br>GCCCCCAGAAATGATATTTGTCTCA | reverse   | 73                 |
| CytBrM      | GTGACTGGAGTTCAGACGTGTGCTCTTCCGATCTGAAGTAAAGCTGCA<br>GCCCCCAGAAATGATATTTGTCTCA  | reverse   | 73                 |
| CytBrN      | GTGACTGGAGTTCAGACGTGTGCTCTTCCGATCTCGGTTAAAGCTGCA<br>GCCCCCAGAAATGATATTTGTCTCA  | reverse   | 73                 |



| primer name | primer sequence                                                             | direction | primer length [bp] |
|-------------|-----------------------------------------------------------------------------|-----------|--------------------|
| CytBrO      | GTGACTGGAGTTCAGACGTGTGCTCTTCCGATCTACCGAAAAGTCA<br>GCCCCTCAGAATGATATTTGTCTCA | reverse   | 73                 |
| CytBrP      | GTGACTGGAGTTCAGACGTGTGCTCTTCCGATCTACGTCAAAGTCA<br>GCCCCTCAGAATGATATTTGTCTCA | reverse   | 73                 |
| CytBrQ      | GTGACTGGAGTTCAGACGTGTGCTCTTCCGATCTAGACTAAAGTCA<br>GCCCCTCAGAATGATATTTGTCTCA | reverse   | 73                 |
| CytBrR      | GTGACTGGAGTTCAGACGTGTGCTCTTCCGATCTAGGAAAAAGTCA<br>GCCCCTCAGAATGATATTTGTCTCA | reverse   | 73                 |
| CytBrS      | GTGACTGGAGTTCAGACGTGTGCTCTTCCGATCTATTCCAAAGTCA<br>GCCCCTCAGAATGATATTTGTCTCA | reverse   | 73                 |
| CytBrT      | GTGACTGGAGTTCAGACGTGTGCTCTTCCGATCTCAATCAAAGTCA<br>GCCCCTCAGAATGATATTTGTCTCA | reverse   | 73                 |
| CytBrV      | GTGACTGGAGTTCAGACGTGTGCTCTTCCGATCTCATGAAAAGTCA<br>GCCCCTCAGAATGATATTTGTCTCA | reverse   | 73                 |
| CytBrX      | GTGACTGGAGTTCAGACGTGTGCTCTTCCGATCTGCTTAAAAGTCA<br>GCCCCTCAGAATGATATTTGTCTCA | reverse   | 73                 |
| CytBrY      | GTGACTGGAGTTCAGACGTGTGCTCTTCCGATCTGGTACAAAGTCA<br>GCCCCTCAGAATGATATTTGTCTCA | reverse   | 73                 |
| CytBrZ      | GTGACTGGAGTTCAGACGTGTGCTCTTCCGATCTAACACAAAGTCA<br>GCCCCTCAGAATGATATTTGTCTCA | reverse   | 73                 |
| CytBrctr    | GTGACTGGAGTTCAGACGTGTGCTCTTCCGATCTATCTGAAAGTCA<br>GCCCCTCAGAATGATATTTGTCTCA | reverse   | 73                 |
| P5-A        | AATGATACGGCGACCACCGAGATCTACACTGCATACACTCTTCCCT<br>ACACGACGCTCTTCCGATCT      | forward   | 67                 |
| P5-B        | AATGATACGGCGACCACCGAGATCTACACTCAGCACACTCTTCCCT<br>ACACGACGCTCTTCCGATCT      | forward   | 67                 |
| P5-C        | AATGATACGGCGACCACCGAGATCTACACAAGCGACACTCTTCCCT<br>ACACGACGCTCTTCCGATCT      | forward   | 67                 |
| P5-D        | AATGATACGGCGACCACCGAGATCTACACACAAGACACTCTTCCCT<br>ACACGACGCTCTTCCGATCT      | forward   | 67                 |
| P5-E        | AATGATACGGCGACCACCGAGATCTACACAGTGGACACTCTTCCCT<br>ACACGACGCTCTTCCGATCT      | forward   | 67                 |
| P5-F        | AATGATACGGCGACCACCGAGATCTACACTTGACACACTCTTCCCT<br>ACACGACGCTCTTCCGATCT      | forward   | 67                 |
| P5-G        | AATGATACGGCGACCACCGAGATCTACACCCTATACACTCTTCCCT<br>ACACGACGCTCTTCCGATCT      | forward   | 67                 |
| P5-H        | AATGATACGGCGACCACCGAGATCTACACGGATGACACTCTTCCCT<br>ACACGACGCTCTTCCGATCT      | forward   | 67                 |
| P5-I        | AATGATACGGCGACCACCGAGATCTACACCTAGGACACTCTTCCCT<br>ACACGACGCTCTTCCGATCT      | forward   | 67                 |
| P5-K        | AATGATACGGCGACCACCGAGATCTACACCACCTACACTCTTCCCT<br>ACACGACGCTCTTCCGATCT      | forward   | 67                 |
| P5-L        | AATGATACGGCGACCACCGAGATCTACACGTCAAACACTCTTCCCT<br>ACACGACGCTCTTCCGATCT      | forward   | 67                 |

| primer name | primer sequence                                                         | direction | primer length [bp] |
|-------------|-------------------------------------------------------------------------|-----------|--------------------|
| P5-M        | AATGATACGGCGACCACCGAGATCTACACGAAGTACACTCTTTCCCT<br>ACACGACGCTCTTCCGATCT | forward   | 67                 |
| P5-N        | AATGATACGGCGACCACCGAGATCTACACCGGTTACACTCTTTCCCT<br>ACACGACGCTCTTCCGATCT | forward   | 67                 |
| P5-O        | AATGATACGGCGACCACCGAGATCTACACACCGAACACTCTTTCCCT<br>ACACGACGCTCTTCCGATCT | forward   | 67                 |
| P5-P        | AATGATACGGCGACCACCGAGATCTACACACGTCACACTCTTTCCCT<br>ACACGACGCTCTTCCGATCT | forward   | 67                 |
| P5-Q        | AATGATACGGCGACCACCGAGATCTACACAGACTACACTCTTTCCCT<br>ACACGACGCTCTTCCGATCT | forward   | 67                 |
| P5-S        | AATGATACGGCGACCACCGAGATCTACACATTCCACACTCTTTCCCT<br>ACACGACGCTCTTCCGATCT | forward   | 67                 |
| P5-T        | AATGATACGGCGACCACCGAGATCTACACCAATCACACTCTTTCCCT<br>ACACGACGCTCTTCCGATCT | forward   | 67                 |
| P5-V        | AATGATACGGCGACCACCGAGATCTACACCATGAACACTCTTTCCCT<br>ACACGACGCTCTTCCGATCT | forward   | 67                 |
| P7-A        | CAAGCAGAAGACGGCATAACGAGATTGCATGTGACTGGAGTTCAGACG<br>TGTGCTCTTCCGATCT    | reverse   | 65                 |
| P7-B        | CAAGCAGAAGACGGCATAACGAGATTCAGCGTGACTGGAGTTCAGACG<br>TGTGCTCTTCCGATCT    | reverse   | 63                 |
| P7-C        | CAAGCAGAAGACGGCATAACGAGATAAGCGGTGACTGGAGTTCAGACG<br>TGTGCTCTTCCGATCT    | reverse   | 63                 |
| P7-D        | CAAGCAGAAGACGGCATAACGAGATAAAGGTGACTGGAGTTCAGACG<br>TGTGCTCTTCCGATCT     | reverse   | 63                 |
| P7-E        | CAAGCAGAAGACGGCATAACGAGATAGTGGGTGACTGGAGTTCAGACG<br>TGTGCTCTTCCGATCT    | reverse   | 63                 |
| P7-F        | CAAGCAGAAGACGGCATAACGAGATTTGACGTGACTGGAGTTCAGACG<br>TGTGCTCTTCCGATCT    | reverse   | 63                 |
| P7-G        | CAAGCAGAAGACGGCATAACGAGATCCTATGTGACTGGAGTTCAGACG<br>TGTGCTCTTCCGATCT    | reverse   | 63                 |
| P7-H        | CAAGCAGAAGACGGCATAACGAGATGGATGGTGACTGGAGTTCAGACG<br>TGTGCTCTTCCGATCT    | reverse   | 63                 |
| P7-I        | CAAGCAGAAGACGGCATAACGAGATCTAGGGTGACTGGAGTTCAGACG<br>TGTGCTCTTCCGATCT    | reverse   | 63                 |
| P7-K        | CAAGCAGAAGACGGCATAACGAGATCACCTGTGACTGGAGTTCAGACG<br>TGTGCTCTTCCGATCT    | reverse   | 63                 |
| P7-L        | CAAGCAGAAGACGGCATAACGAGATGTCAAGTGACTGGAGTTCAGACG<br>TGTGCTCTTCCGATCT    | reverse   | 63                 |
| P7-M        | CAAGCAGAAGACGGCATAACGAGATGAAGTGTGACTGGAGTTCAGACG<br>TGTGCTCTTCCGATCT    | reverse   | 63                 |
| P7-N        | CAAGCAGAAGACGGCATAACGAGATCGGTTGTGACTGGAGTTCAGACG<br>TGTGCTCTTCCGATCT    | reverse   | 63                 |
| P7-O        | CAAGCAGAAGACGGCATAACGAGATACCGAGTGACTGGAGTTCAGACG<br>TGTGCTCTTCCGATCT    | reverse   | 63                 |

| <b>primer name</b> | <b>primer sequence</b>                                               | <b>direction</b> | <b>primer length [bp]</b> |
|--------------------|----------------------------------------------------------------------|------------------|---------------------------|
| P7-P               | CAAGCAGAAGACGGCATAACGAGATACGTCGTGACTGGAGTTCAGACG<br>TGTGCTCTTCCGATCT | reverse          | 63                        |
| P7-Q               | CAAGCAGAAGACGGCATAACGAGATAGACTGTGACTGGAGTTCAGACG<br>TGTGCTCTTCCGATCT | reverse          | 63                        |
| P7-R               | CAAGCAGAAGACGGCATAACGAGATAGGAAGTGACTGGAGTTCAGACG<br>TGTGCTCTTCCGATCT | reverse          | 63                        |
| P7-T               | CAAGCAGAAGACGGCATAACGAGATCAATCGTGACTGGAGTTCAGACG<br>TGTGCTCTTCCGATCT | reverse          | 63                        |
| P7-V               | CAAGCAGAAGACGGCATAACGAGATCATGAGTGACTGGAGTTCAGACG<br>TGTGCTCTTCCGATCT | reverse          | 63                        |
| P7-W               | CAAGCAGAAGACGGCATAACGAGATCCACAGTGACTGGAGTTCAGACG<br>TGTGCTCTTCCGATCT | reverse          | 63                        |
| P7-X               | CAAGCAGAAGACGGCATAACGAGATGCTTAGTGACTGGAGTTCAGACG<br>TGTGCTCTTCCGATCT | reverse          | 63                        |
| P7-Y               | CAAGCAGAAGACGGCATAACGAGATGGTACGTGACTGGAGTTCAGACG<br>TGTGCTCTTCCGATCT | reverse          | 63                        |
| P7-Z               | CAAGCAGAAGACGGCATAACGAGATAACACGTGACTGGAGTTCAGACG<br>TGTGCTCTTCCGATCT | reverse          | 6                         |

979

**Supplemental table 2:** List of Bornean species that were weighted in the PROTAX assignment.

| Species                          | Species                           | Species                          |
|----------------------------------|-----------------------------------|----------------------------------|
| <i>Bos,javanicus</i>             | <i>Arctictis,binturong</i>        | <i>Chiropodomys,muroides</i>     |
| <i>Bos,taurus</i>                | <i>Arctogalidia,trivirgata</i>    | <i>Leopoldamys,sabanus</i>       |
| <i>Bubalus,bubalis</i>           | <i>Cynogale,bennettii</i>         | <i>Maxomys,baeodon</i>           |
| <i>Capra,hircus</i>              | <i>Diplogale,hosei</i>            | <i>Maxomys,ochraceiventer</i>    |
| <i>Muntiacus,atherodes</i>       | <i>Hemigalus,derbyanus</i>        | <i>Maxomys,rajah</i>             |
| <i>Muntiacus,muntjak</i>         | <i>Paguma,larvata</i>             | <i>Maxomys,surifer</i>           |
| <i>Rusa,timorensis</i>           | <i>Paradoxurus,hermaphroditus</i> | <i>Maxomys,whiteheadi</i>        |
| <i>Rusa,unicolor</i>             | <i>Prionodon,linsang</i>          | <i>Niviventer,cremoriventer</i>  |
| <i>Sus,barbatus</i>              | <i>Viverra,tangalunga</i>         | <i>Niviventer,rapit</i>          |
| <i>Sus,scrofa</i>                | <i>Galeopterus,variegatus</i>     | <i>Rattus,argentiventer</i>      |
| <i>Tragulus,javanicus</i>        | <i>Echinosorex,gymnura</i>        | <i>Rattus,exulans</i>            |
| <i>Tragulus,napu</i>             | <i>Hylomys,suillus</i>            | <i>Rattus,norvegicus</i>         |
| <i>Canis,lupus</i>               | <i>Dicerorhinus,sumatrensis</i>   | <i>Rattus,rattus</i>             |
| <i>Catopuma,badia</i>            | <i>Manis,javanica</i>             | <i>Rattus,tiomanicus</i>         |
| <i>Felis,catus</i>               | <i>Macaca,fascicularis</i>        | <i>Sundamys,muelleri</i>         |
| <i>Neofelis,diardi</i>           | <i>Macaca,nemestrina</i>          | <i>Aeromys,tephromelas</i>       |
| <i>Pardofelis,marmorata</i>      | <i>Nasalis,larvatus</i>           | <i>Aeromys,thomasi</i>           |
| <i>Prionailurus,bengalensis</i>  | <i>Presbytis,hosei</i>            | <i>Callosciurus,adamsi</i>       |
| <i>Prionailurus,planiceps</i>    | <i>Presbytis,rubicunda</i>        | <i>Callosciurus,notatus</i>      |
| <i>Herpestes,brachyurus</i>      | <i>Presbytis,sabana</i>           | <i>Callosciurus,prevostii</i>    |
| <i>Herpestes,semitorquatus</i>   | <i>Trachypithecus,cristatus</i>   | <i>Dremomys,everetti</i>         |
| <i>Mydaus,javanensis</i>         | <i>Pongo,pygmaeus</i>             | <i>Exilisciurus,exilis</i>       |
| <i>Aonyx,cinereus</i>            | <i>Hylobates,muelleri</i>         | <i>Hylopetes,spadiceus</i>       |
| <i>Lutra,lutra</i>               | <i>Nycticebus,menagensis</i>      | <i>Iomys,horsfieldii</i>         |
| <i>Lutra,sumatrana</i>           | <i>Cephalopachus,bancanus</i>     | <i>Petaurillus,hosei</i>         |
| <i>Lutrogale,perspicillata</i>   | <i>Elephas,maximus</i>            | <i>Petaurista,petaurista</i>     |
| <i>Martes,flavigula</i>          | <i>Hystrix,brachyura</i>          | <i>Petinomys,genibarbis</i>      |
| <i>Melogale,everetti</i>         | <i>Hystrix,crassispinis</i>       | <i>Pteromyscus,pulverulentus</i> |
| <i>Mustela,nudipes</i>           | <i>Trichys,fasciculata</i>        | <i>Ratufa,affinis</i>            |
| <i>Helarctos,malayanus</i>       | <i>Chiropodomys,gliroides</i>     | <i>Rheithrosciurus,macrotis</i>  |
| <i>Rhinosciurus,laticaudatus</i> | <i>Tupaia,dorsalis</i>            | <i>Crocidura,monticola</i>       |
| <i>Sundasciurus,brookei</i>      | <i>Tupaia,gracilis</i>            | <i>Suncus,etruscus</i>           |

| Species                      | Species                | Species               |
|------------------------------|------------------------|-----------------------|
| <i>Sundasciurus,hippurus</i> | <i>Tupaia,longipes</i> | <i>Suncus,murinus</i> |
| <i>Sundasciurus,lowii</i>    | <i>Tupaia,minor</i>    |                       |
| <i>Ptilocercus,lowii</i>     | <i>Tupaia,tana</i>     |                       |

980

1  
2  
3  
4  
5  
6  
7  
8  
9  
10  
11  
12  
13  
14  
15  
16  
17  
18  
19  
20  
21  
22  
23  
24  
25  
26  
27  
28  
29  
30  
31  
32  
33  
34  
35  
36  
37  
38  
39  
40  
41  
42  
43  
44  
45  
46  
47  
48  
49  
50  
51  
52  
53  
54  
55  
56  
57  
58  
59  
60  
61  
62  
63  
64  
65

**Supplemental table 3:** Summary of the read losses of each sample during the read processing steps for each sequencing run separately. The first line gives the raw read number per sample. The losses are given as percentage of each step; 1. merging of the R1/R2 reads of the Illumina sequencing done by *usearch* [43; 44], 2. clipping of primers and trimming of reads using *cutadapt* [45], 3. quality filtering and 4. dereplication, both using *usearch*.

|                 | Step                | Mean  | SD     | Median | Min | Max     |
|-----------------|---------------------|-------|--------|--------|-----|---------|
| <b>SeqRun01</b> | raw                 | 72977 | 96466  | 74     | 1   | 422271  |
|                 | merging             | 7%    | 11%    | 2%     | 1%  | 50%     |
|                 | clipping & trimming | 2%    | 14%    | 0%     | 0%  | 100%    |
|                 | filtering           | 4%    | 11%    | 2%     | 1%  | 100%    |
| <b>SeqRun02</b> | raw                 | 97372 | 83870  | 117626 | 1   | 409999  |
|                 | merging             | 22%   | 23%    | 13%    | 2%  | 98%     |
|                 | clipping & trimming | 2%    | 13%    | 0%     | 0%  | 100%    |
|                 | filtering           | 6%    | 3%     | 6%     | 5%  | 43%     |
| <b>SeqRun03</b> | raw                 | 57359 | 123971 | 48     | 1   | 1105978 |
|                 | merging             | 5%    | 3%     | 5%     | 1%  | 11%     |
|                 | clipping & trimming | 43%   | 40%    | 28%    | 0%  | 100%    |
|                 | filtering           | 37%   | 20%    | 29%    | 24% | 100%    |
| <b>SeqRun04</b> | raw                 | 8629  | 10184  | 2075   | 1   | 37592   |
|                 | merging             | 8%    | 2%     | 8%     | 6%  | 14%     |
|                 | clipping & trimming | 79%   | 34%    | 100%   | 0%  | 100%    |
|                 | filtering           | 38%   | 18%    | 34%    | 0%  | 92%     |
| <b>SeqRun05</b> | raw                 | 77936 | 193818 | 36     | 1   | 1081947 |
|                 | merging             | 34%   | 17%    | 36%    | 4%  | 89%     |
|                 | clipping & trimming | 50%   | 41%    | 59%    | 0%  | 100%    |
|                 | filtering           | 53%   | 19%    | 51%    | 0%  | 100%    |
| <b>SeqRun06</b> | raw                 | 80816 | 80656  | 87013  | 1   | 407872  |
|                 | merging             | 10%   | 15%    | 3%     | 1%  | 69%     |
|                 | clipping & trimming | 0%    | 0%     | 0%     | 0%  | 1%      |
|                 | filtering           | 5%    | 1%     | 4%     | 4%  | 7%      |
| <b>SeqRun07</b> | raw                 | 90040 | 91022  | 81026  | 1   | 383072  |
|                 | merging             | 23%   | 25%    | 10%    | 2%  | 99%     |
|                 | clipping & trimming | 1%    | 8%     | 0%     | 0%  | 100%    |
|                 | filtering           | 6%    | 1%     | 6%     | 4%  | 10%     |
| <b>SeqRun08</b> | raw                 | 52951 | 132500 | 64     | 1   | 993255  |
|                 | merging             | 14%   | 8%     | 17%    | 1%  | 26%     |
|                 | clipping & trimming | 89%   | 24%    | 100%   | 1%  | 100%    |
|                 | filtering           | 49%   | 37%    | 28%    | 0%  | 100%    |

981

**Supplemental table 4:** Number of merged R1/R2 reads per sample that were used for the taxonomic assignment for each of the eight sequencing runs. Displayed are the median, minimum, maximum read numbers per PCR replicate, the mean and its standard deviation as well as the number of PCR replicates with less than 500 reads.

|        | SeqRun01 | SeqRun02 | SeqRun03 | SeqRun04 | SeqRun05 | SeqRun06 | SeqRun07 | SeqRun08 |
|--------|----------|----------|----------|----------|----------|----------|----------|----------|
| median | 172,566  | 122,890  |          |          |          | 132,313  | 138,584  |          |
| min    | 15       | 106      |          |          |          | 14,343   | 422      |          |
| max    | 408,924  | 293,765  |          |          |          | 385,649  | 309,591  |          |
| mean   | 162,487  | 110,274  |          |          |          | 126,365  | 120,850  |          |
| sd     | 65,214   | 62,835   |          |          |          | 54,000   | 68,996   |          |
| < 500  | 1        | 1        |          |          |          | 0        | 1        |          |
| median |          |          | 46,597   | 9,628    | 9,383    |          |          | 52,260   |
| min    |          |          | 2        | 3        | 3        |          |          | 1,164    |
| max    |          |          | 380,936  | 19,961   | 19,621   |          |          | 516,686  |
| mean   |          |          | 64,377   | 8,747    | 8,551    |          |          | 70,999   |
| sd     |          |          | 66,703   | 4,824    | 4,736    |          |          | 97,161   |
| < 500  |          |          | 9        | 62       | 62       |          |          | 49       |
| median |          |          |          | 8,428    | 8,218    |          |          | 53,104   |
| min    |          |          |          | 3        | 3        |          |          | 2        |
| max    |          |          |          | 19,961   | 19,621   |          |          | 608,948  |
| mean   |          |          |          | 7,815    | 7,638    |          |          | 79,434   |
| sd     |          |          |          | 5,473    | 5,365    |          |          | 120,055  |
| < 500  |          |          |          | 21       | 21       |          |          | 13       |

982

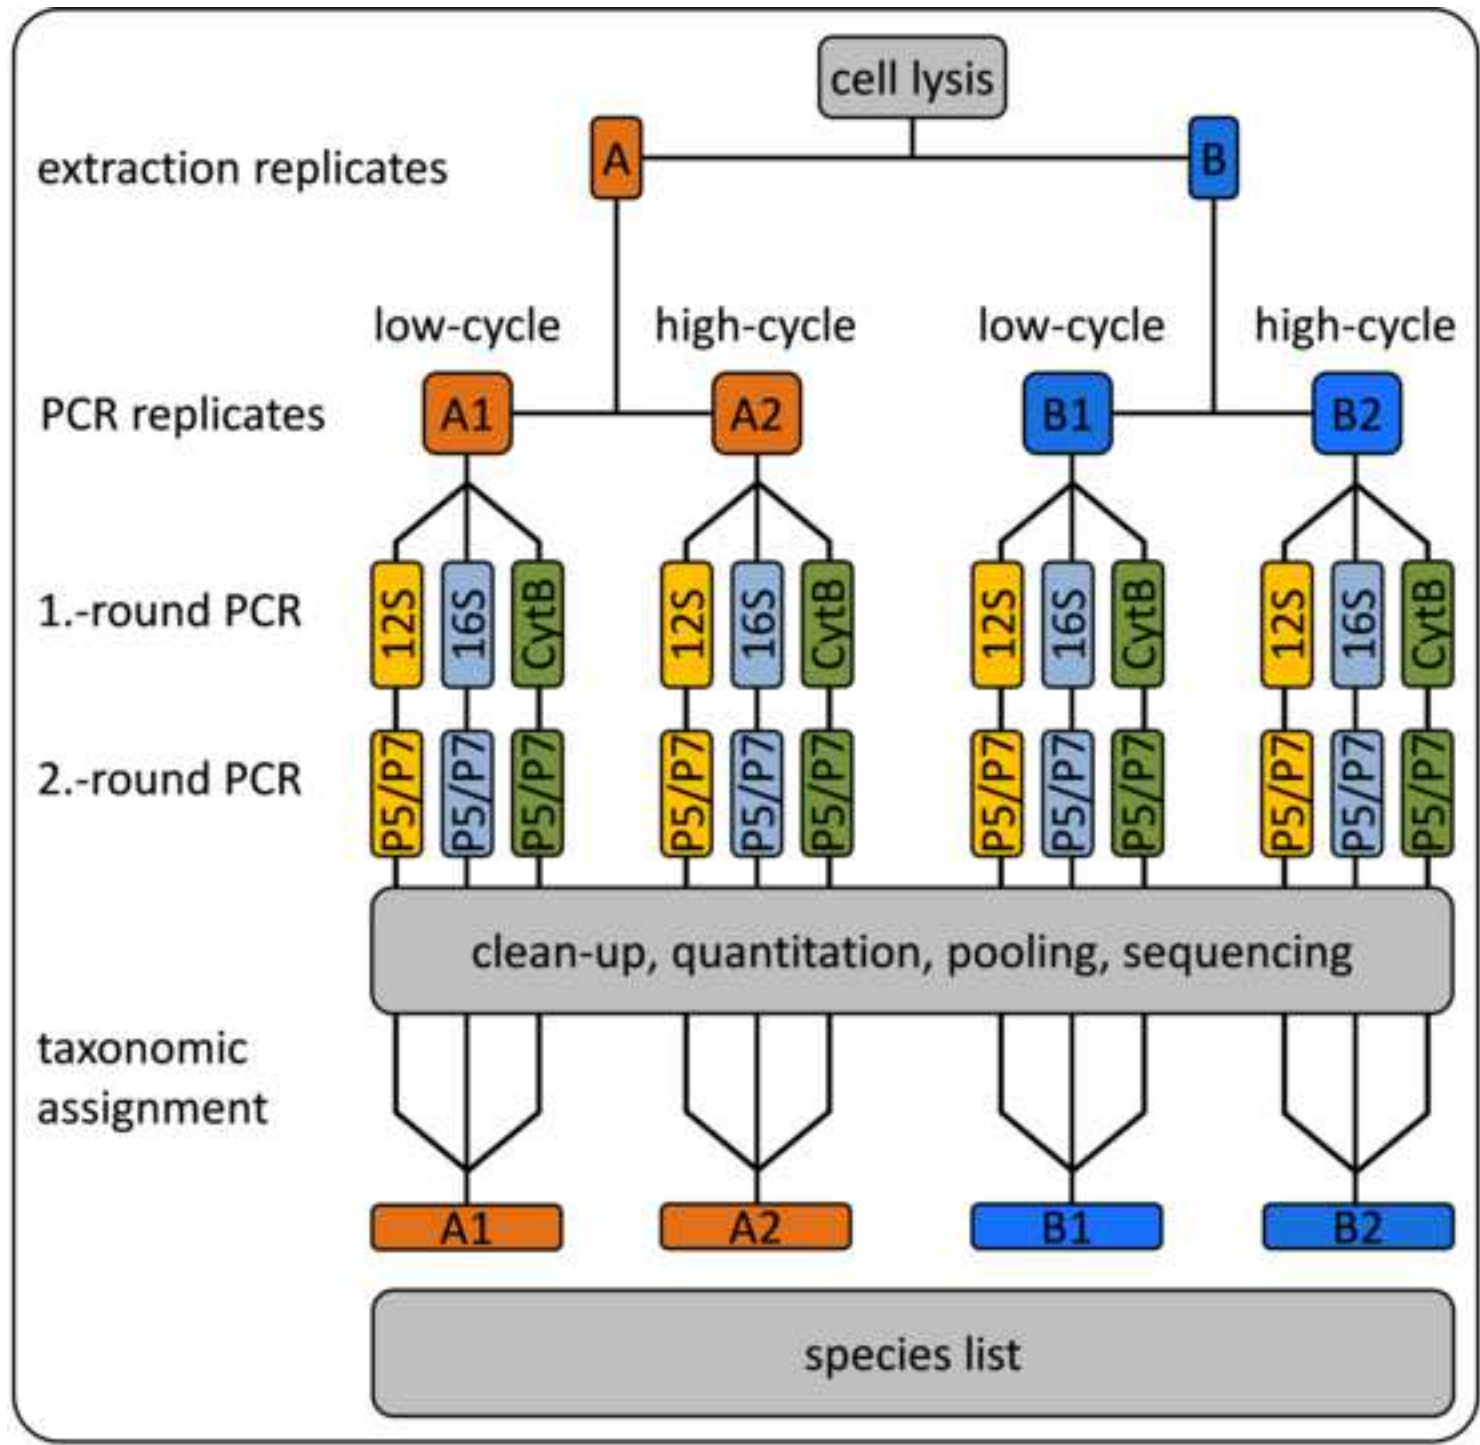



### 1.-round PCR

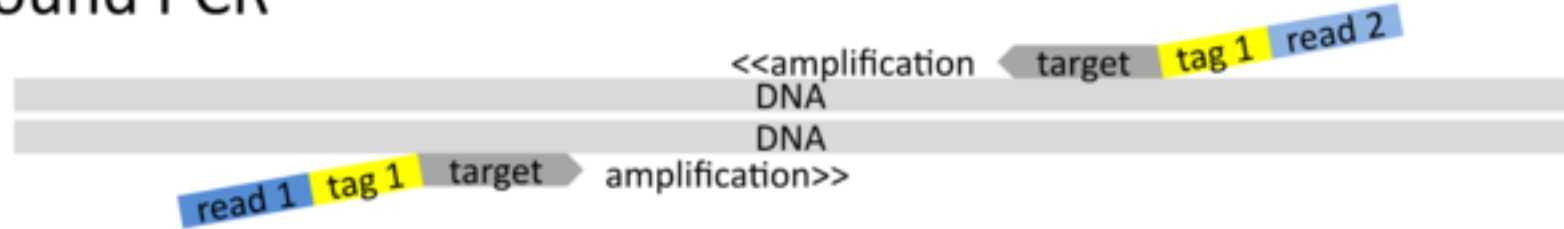

### 1.-round product:

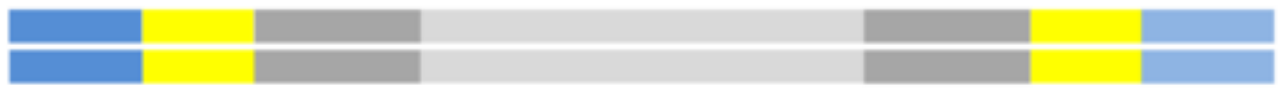

### 2.-round PCR

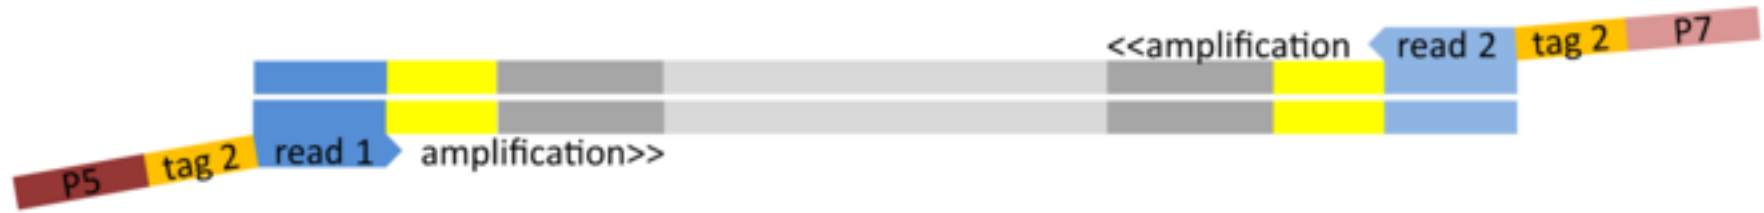

### 2.-round product:

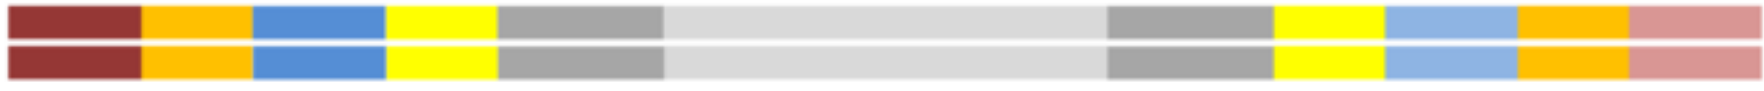

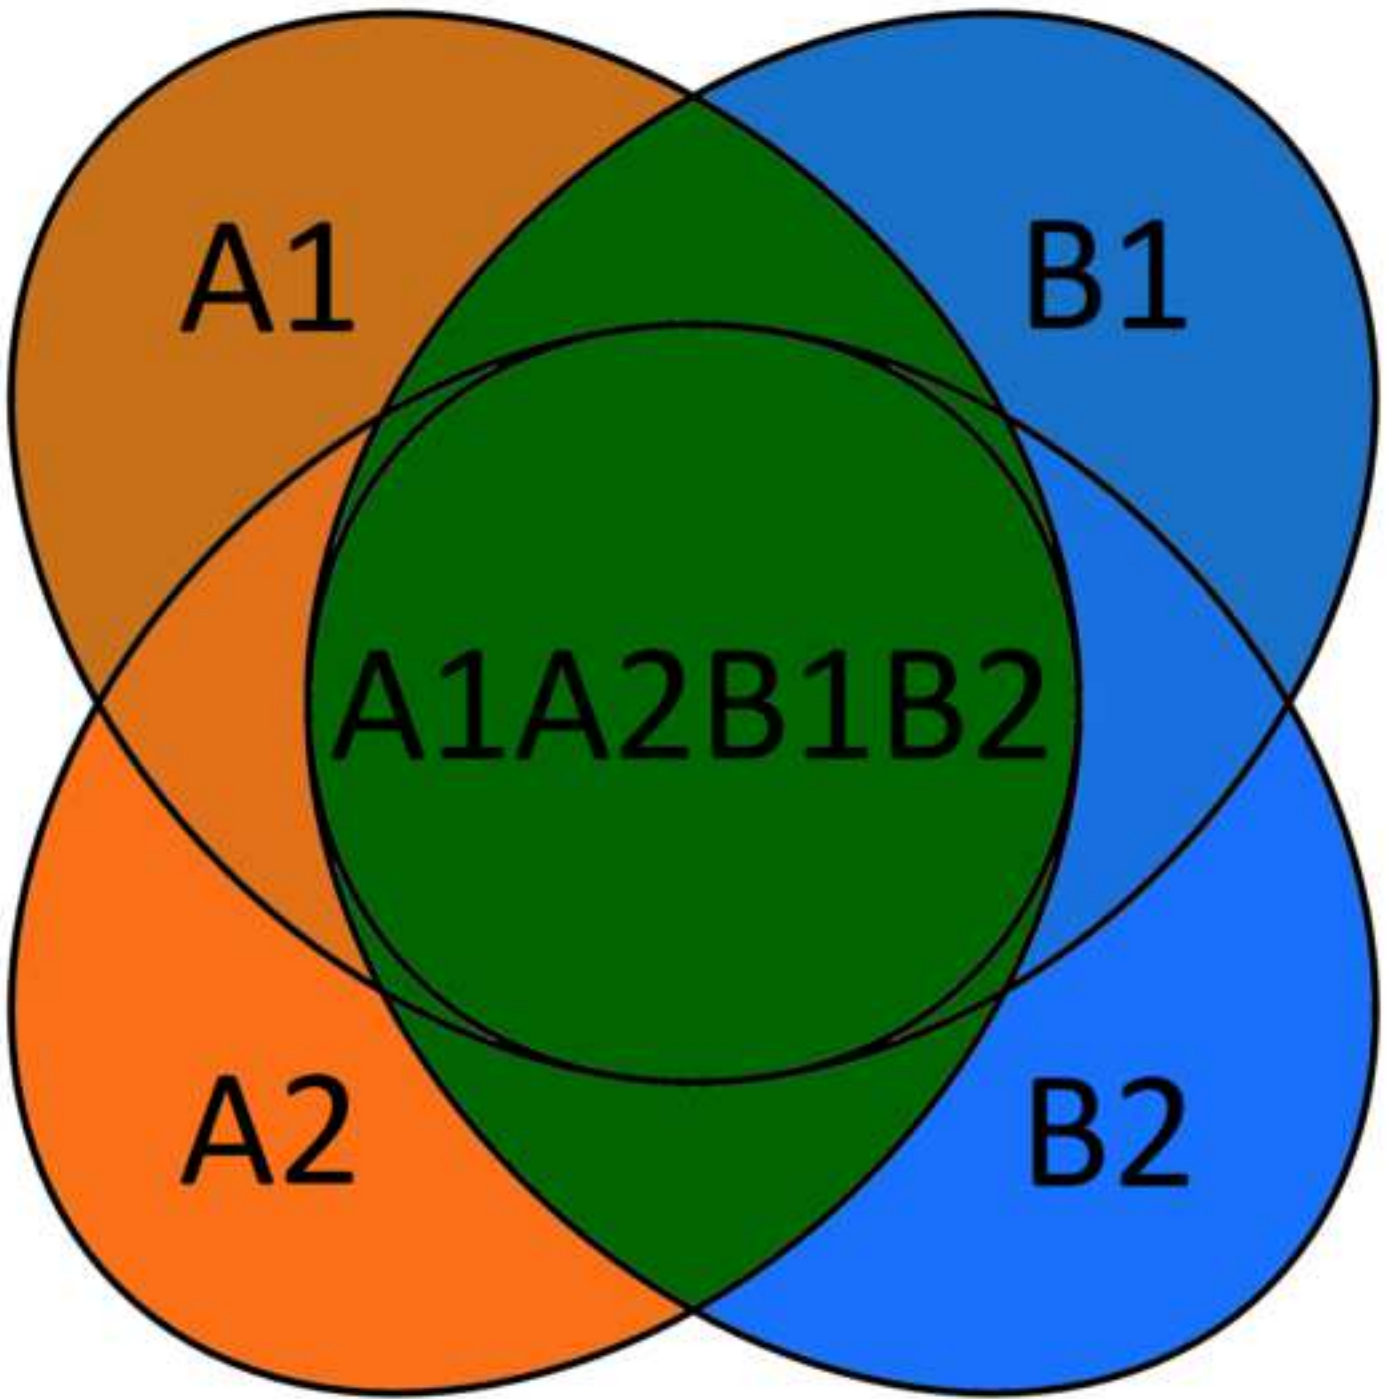

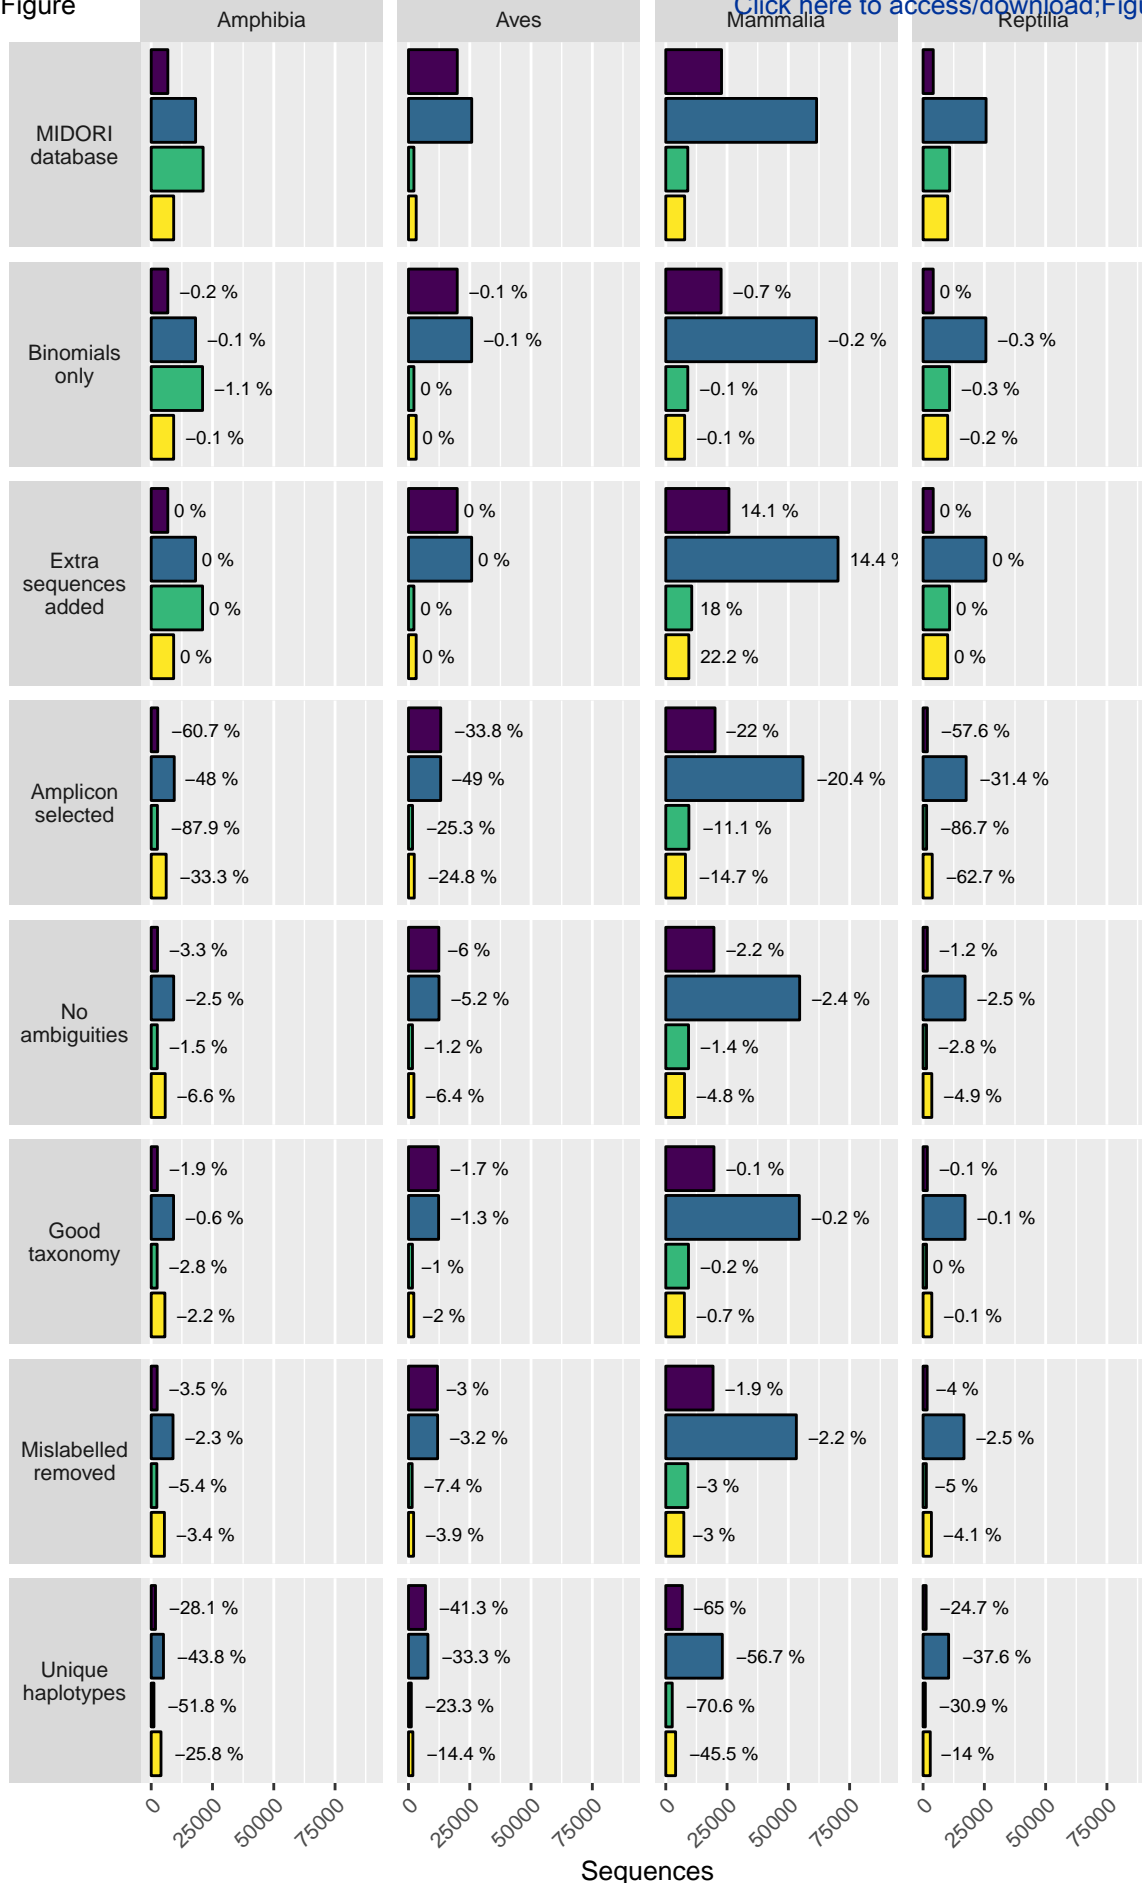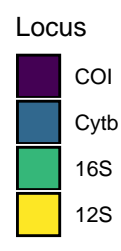

Sequences

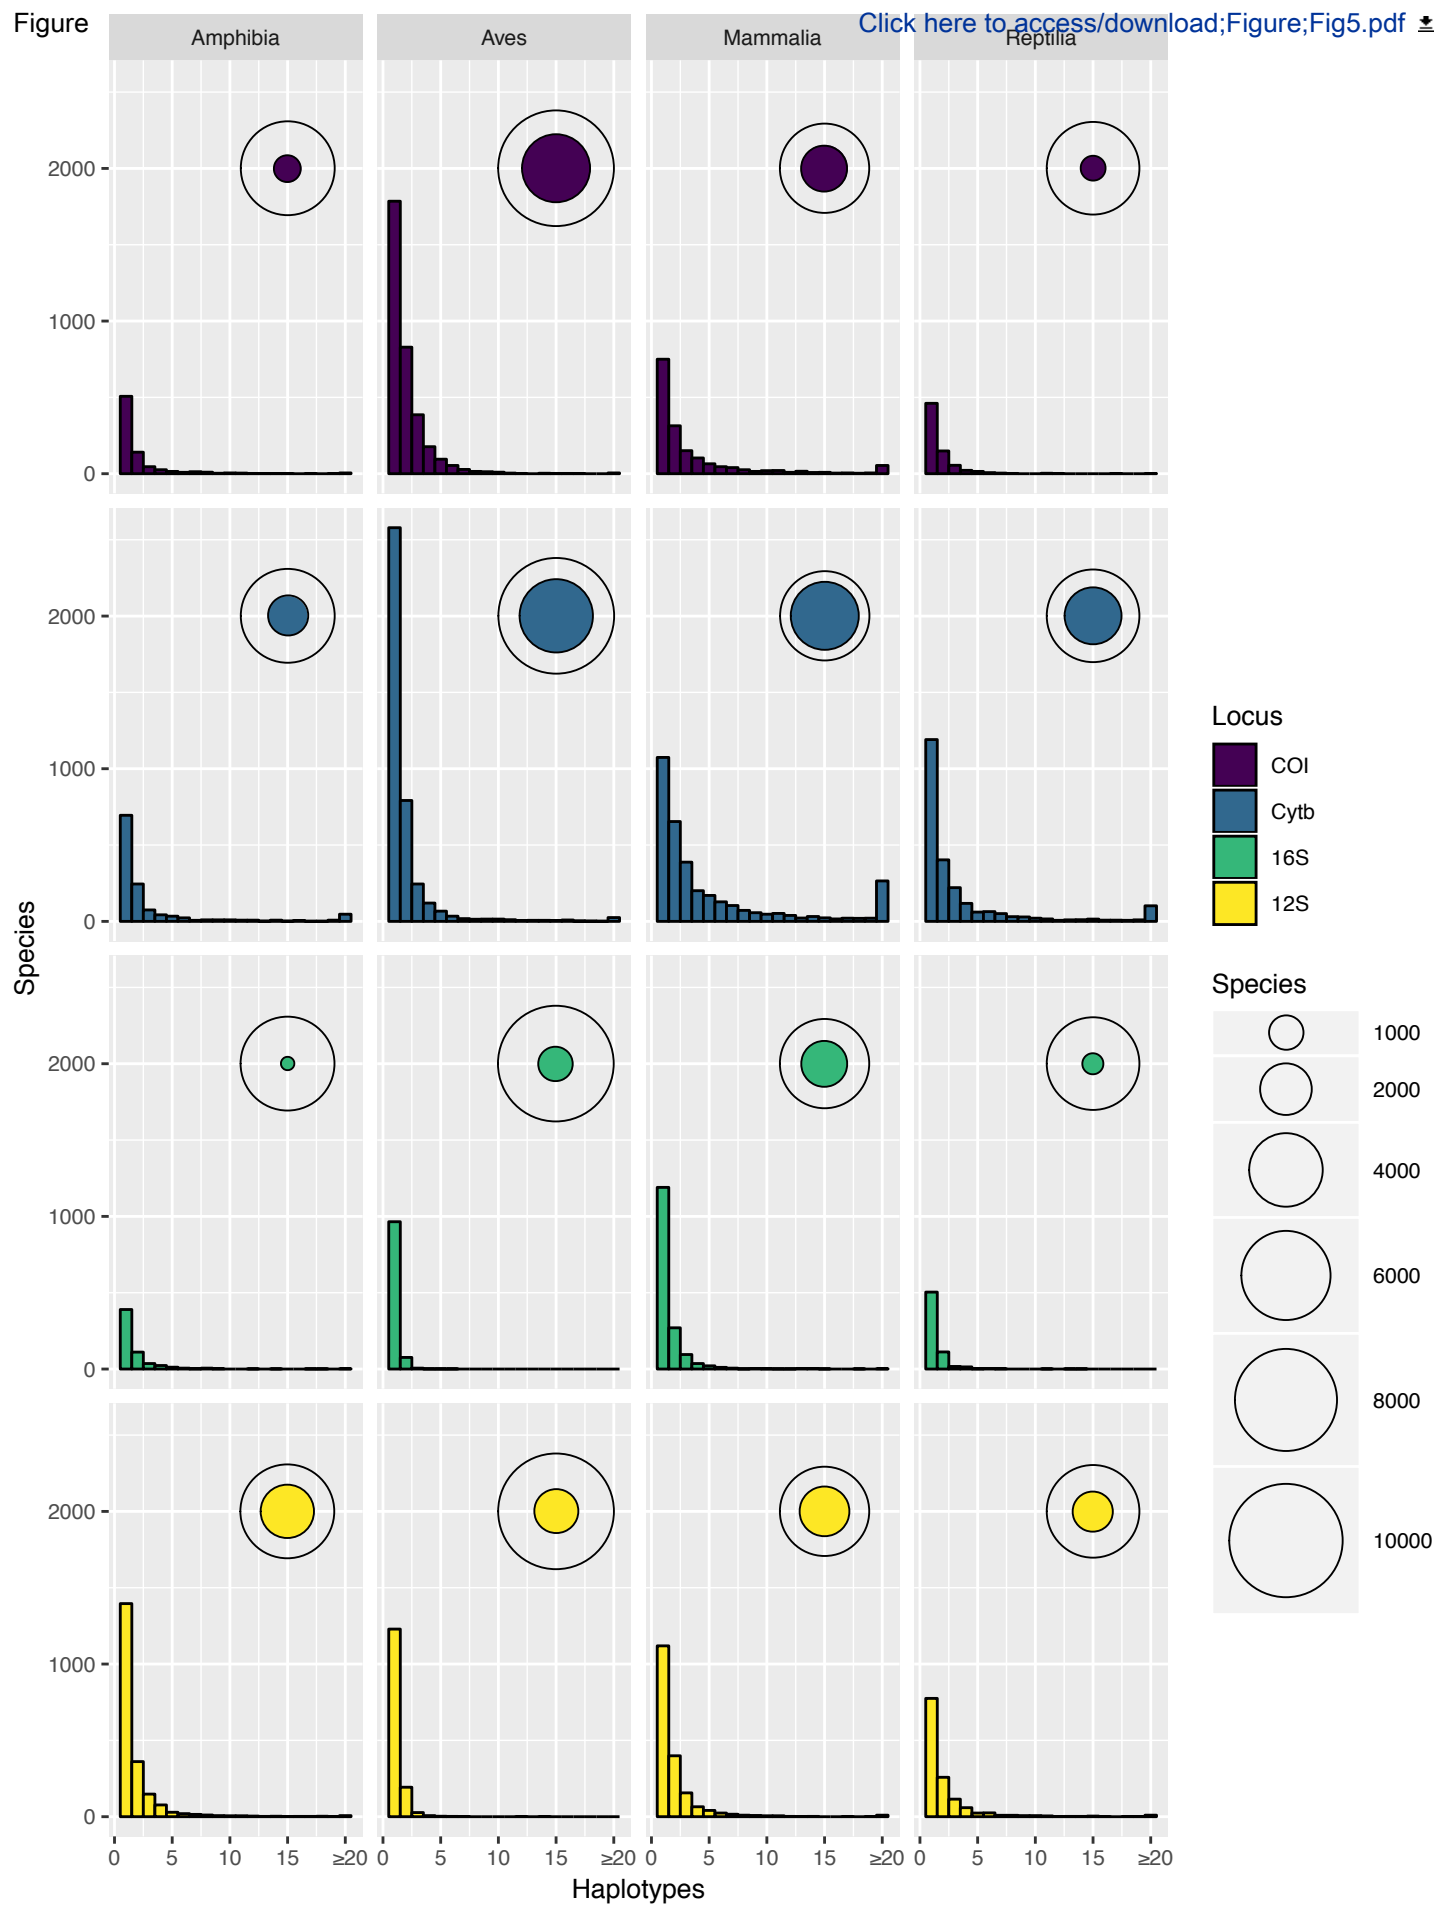

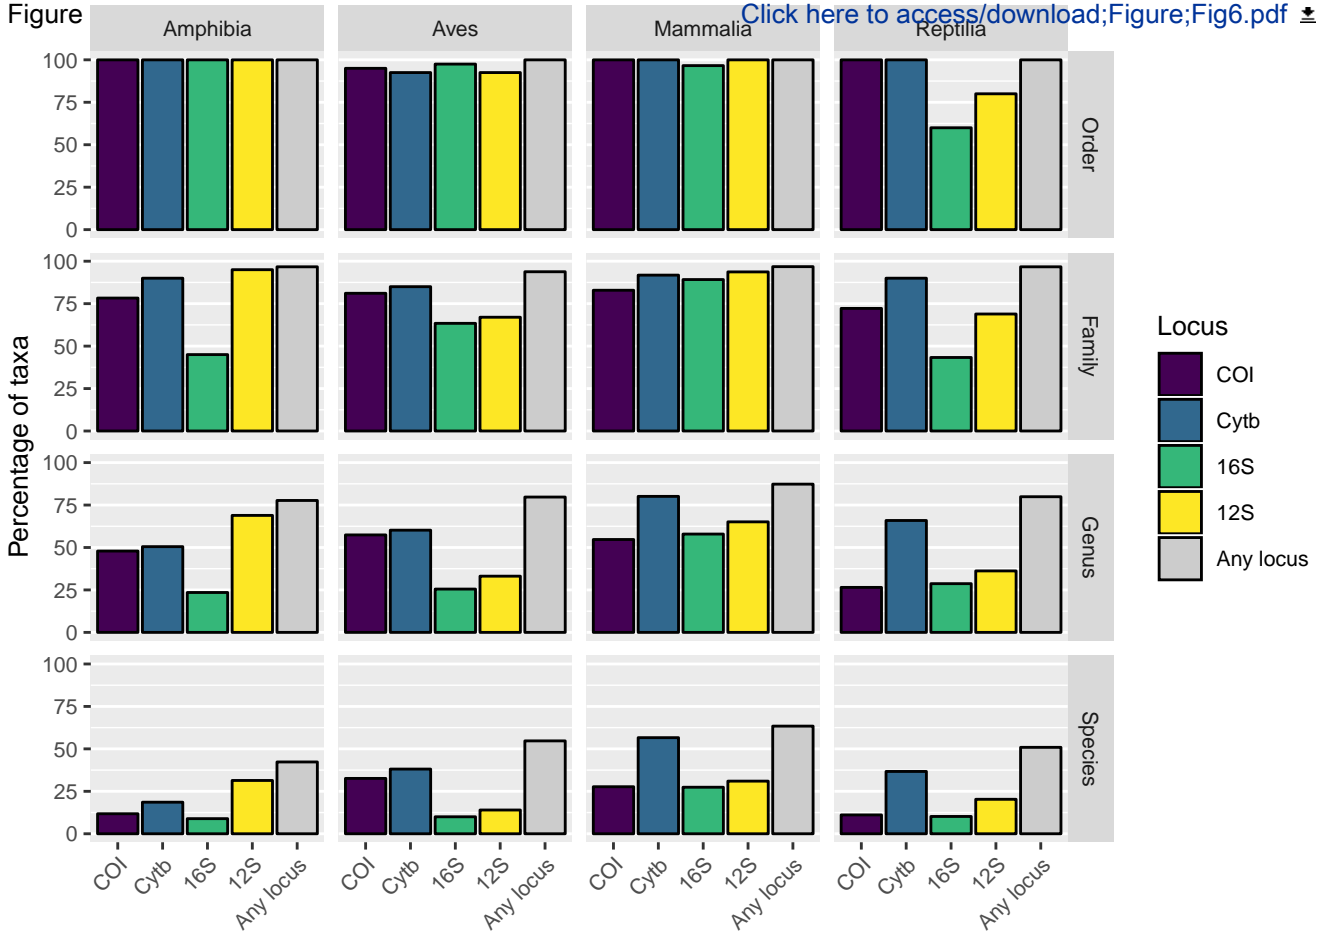

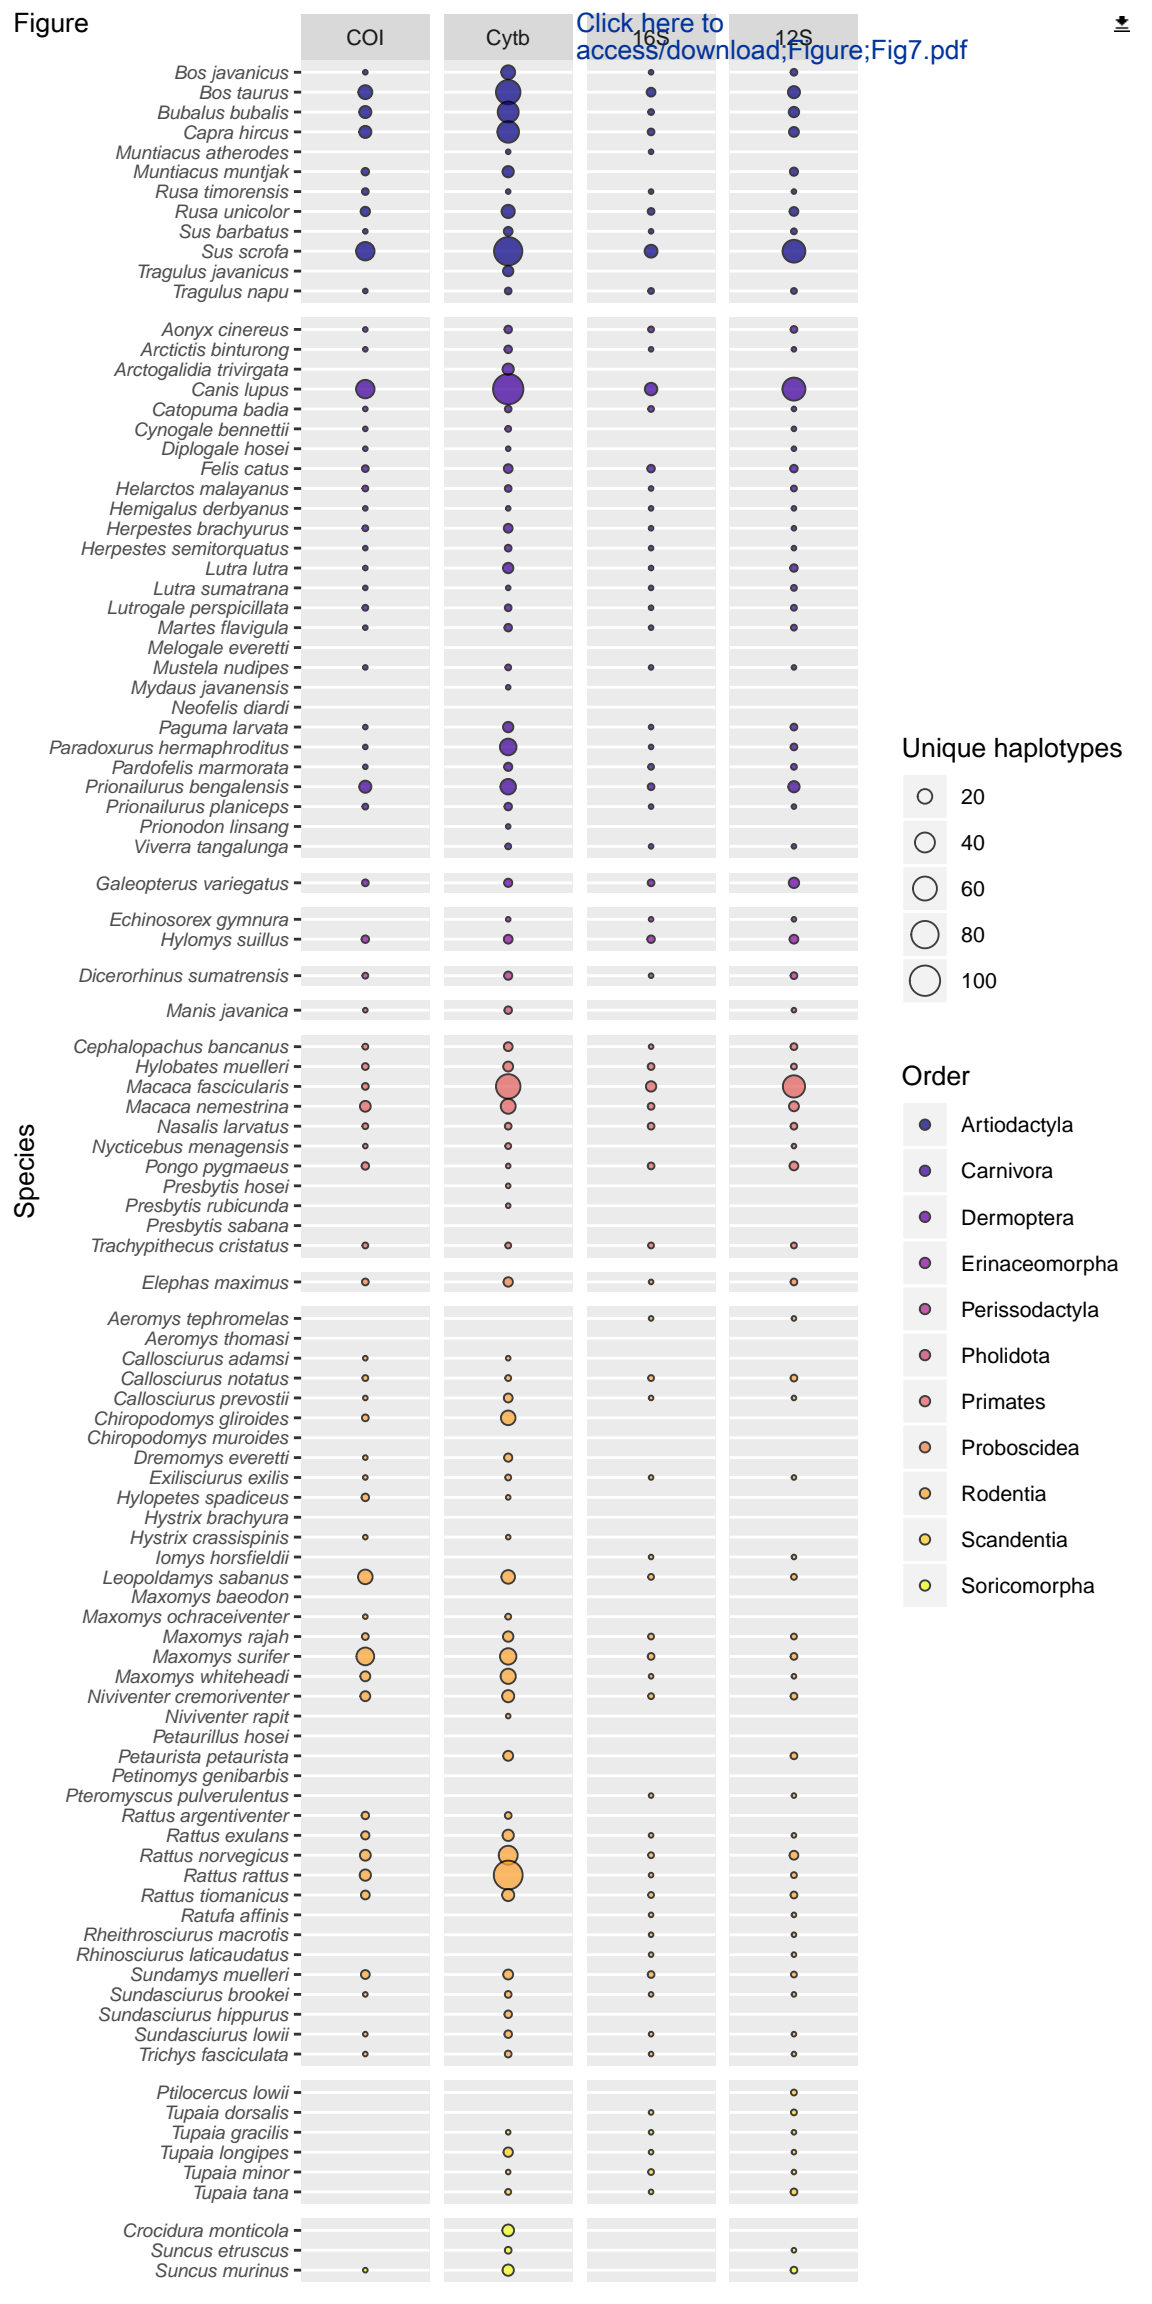



Click here to access/download  
**Supplementary Material**  
Suppl\_Fig1.jpg



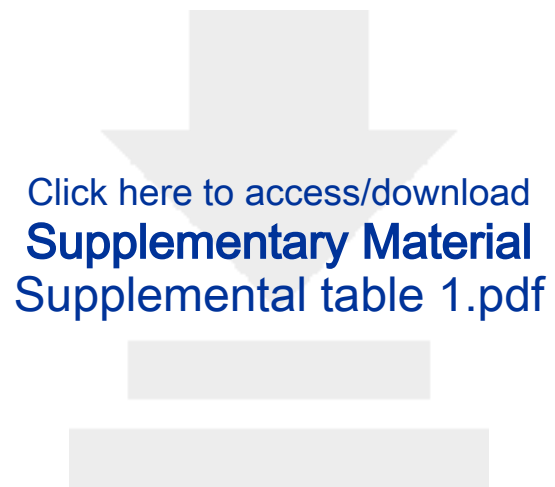



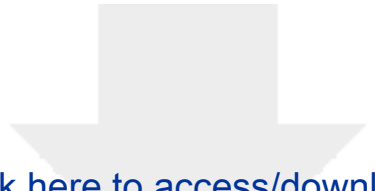

Click here to access/download  
**Supplementary Material**  
Supplemental table 2.pdf

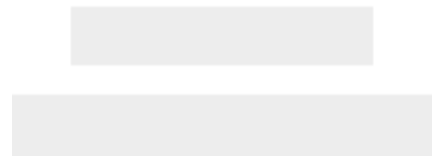



Click here to access/download  
**Supplementary Material**  
Supplemental table 3.pdf





Click here to access/download  
**Supplementary Material**  
Supplemental table 4.pdf



Dear Hongling Zhou,

First we would like to thank both reviewers for their positive feedback and the editor for the potential interest to publish our paper in GigaScience. Below we provide a detailed response to the remaining comments and suggestions by the reviewers. These certainly helped to improve the manuscript further and we thank the reviewers for their valuable comments.

On behalf of our co-authors,

Jan Axtner & Andreas Wilting

Reviewer reports:

Reviewer #1: Thank you for taking the time to address all comments in detail. The corrections I think have improved the clarity of the piece, and I feel convinced where you explained where I misunderstood. One possible reference to consider (given a comment about the availability of models to account for errors at multiple levels):

Guillera-Arroita. 2017. Dealing with false-positive and false-negative errors about species occurrence at multiple levels. *Methods in Ecology and Evolution*. <https://doi.org/10.1111/2041-210X.12743>

→ Thank you for the positive feedback and the interesting article. So far we were not aware of it, but as it fit's so perfectly to our topic, thus we now refer to it in line 561.

Reviewer #2: I am overall satisfied with the responses provided by the authors. In general, it is quite unlikely nowadays that there will be a consensus for the "right/best" way forward. It is always subject to practicality/funding. If i were to conduct my own amplicon seq project, will I follow this protocol to the dots - no. However, the bioinformatics scripts and data generated will be useful for better experimental design in the future. Furthermore, even if a method is robust, lab competency / human error (mislabeling, mixing the wrong index etc) is still going to be an issue.

-----

Reviewer 1 raised the concern of similar tag1 being used repeatedly for multiple samples. I wonder if instead of using "Twin" tag, having a different tag1 combination (non-Twin tag?!) will be helpful (obviously for discussion). In other words, the forward and reverse primer combination in the 1st PCR round can be Tag1a for forward Tag1b for reverse. This is somewhat similar to dual indexing in Illumina but you're doing it at the initial stage and should will expand the 24 sample limitation for the tag1 based on my current understanding the twin-tag but happy to be proven wrong. With the increasing problem of index hopping particularly with the patterned flowcell for the Novaseq and Iseq (relevant to amplicon seq) , this should be useful and worth looking into.

See <https://www.biorxiv.org/content/early/2017/10/19/205799>

→ We agree that are other factors like lab skills or human errors that are an important issue and in fact our whole laboratory procedure is designed to minimize human-related errors. The whole workflow is designed to allow a high-throughput of samples in a maximum standardized way, i.e. sample aliquots are arranged already in eight-well stripes for the use of eight-channel pipets in order to minimize the risk of pipetting the wrong sample into the wrong well between the different replicates. That is also one of the reasons why we do not start mixing the tag1 combinations and re-use the 24 tags for each PCR plate. Our forward and reverse primers are already pre-mixed in an eight-well stripe and we use the same pipetting scheme with an eight-channel pipet for every 96-well PCR plate. If we would start using different tag combinations for each PCR plate we would have a much higher risk of pipetting errors mixing the wrong indices (handling 48 tubes is much more error prone than handling just three 8-well stripes).

In addition to this rather practical lab-work related reason we highlighted (Line: 602 to 605) that it is still very unlikely that the repeated use of tags for multiple samples causes accepted false positives in the end, as the final acceptance is not based on single occurrence but on repeated occurrence in independent replicates. We fully agree that the use of non-matching tags (e.g. A/B) would increase the number of samples that could be analysed in one sequencing run. But at the same time it would make it much harder to identify contaminations or tag jumps as we discuss in line 575 to 599. Contaminations of a PCR with another differently labelled PCR product would increase the number of chimeras in your PCR which would remain undetected if you would also use non-matching tag combination. The same holds true for tag-jumps, which are an issue in Illumina sequencing (see Schnell et al. 2015) and where we could demonstrate that our PCR libraries reduce the read-losses compared to adapter-ligation techniques (lines 585-594). Particular for the last reasons we favoured to use only twin-tag combinations.

→ We also thank the reviewer for the interesting paper, which also used quadruple-indexed libraries. We do however not see the application of RAD sequencing to identify invertebrate-derived DNA of unknown origin. Generally RAD sequencing requires high molecular weight genomic DNA. Our samples have a mixed pools of genomic and mitochondrial DNA from different organisms and our target DNA is often highly degraded, of poor quality and of low quantities. In addition we have the presence of high amounts of leech DNA. Therefore we currently do not see an application of this sequencing method.

-----  
"Also the read losses due to trimming and quality filtering were significantly lower for the 16S sequencing runs (1.3% and 5.3% in average, Supplemental Table 3) compared to the sequencing runs for the longer fragments of 12S and CytB (65.3% and 44.3% in average, Supplemental Table 3)."

The Usearch read overlapping pipeline is sensitive to number of mismatches in alignment. The Read2 in MiSeq 600 cycles run is particularly notoriously for being low quality towards the end of the run. Try trimming both R1 and R2 to 250 bp (length trimming) and redo the overlap and read loss calculation.

→ Thank you, for this valuable advice. We tested it for one of our 12S runs and compared results. As you suggested we trimmed the reads to 250 base pairs adjusted the -fastq\_minovlen parameter for usearch from 50bp to just 25bp as we would expect to have a smaller overlap of the trimmed reads. In fact we obtained more read after merging (13,129,505 vs. 13,388,933). However, most of those reads were lost again after filtering so that our original settings produced in fact the most reads I the end (4,694,624 vs. 4,227,346). Thus we think it is reasonable to stick to the current settings in the pipeline.

Results original pipeline:  
raw reads: 13,766,169  
merging: 13,129,505  
clipping: 6,498,738  
filtering: 4,694,624

Trimmed reads (trimm 250bp, overlap 25bp):  
raw reads: 13,766,169  
merging: 13,388,933  
clipping: 6,684,766  
filtering: 4,227,346

-----  
"All three markers were amplified simultaneously for each batch of samples in a single PCR plate".

In different individual well?

→ Sorry for the misunderstanding, we did not do multiplex-PCR and amplified in individual wells. We added this to the sentence in lines 324-325:

"... All three markers were amplified simultaneously in individual wells for each batch of samples in a single PCR plate. ..."

-----  
Because of different amplicon lengths and therefore different binding affinities to the flow cell  
Also due to clustering efficiency . smaller fragment = easier to amplify

→ We agree, also due to DNA degradation we had higher amplification success for the shortest fragment (see lines 562 – 566). As we say in lines 337-340 "...Because of different amplicon lengths and therefore different binding affinities to the flow cell, 12S and CytB products were combined in a single library, whereas positive 16S products were always combined in a separate library. ..." and these libraries were sequenced independently. To make this clearer we added a second sentence (line 340): "... 12S/CytB libraries were sequenced independently from 16S libraries..."
